# Supplementary material for: Plasma-Derived Exosomal ALIX as a Novel Biomarker for Diagnosis and Classification of Pancreatic Cancer
Source: Front Oncol. 2021 May 5;11:628346. doi: 10.3389/fonc.2021.628346 (PMC8131866; doi:10.3389/fonc.2021.628346)
Supplement: Supplementary Table 1 — A list of total proteins identified in the plasma-derived exosomes. [file Table_1.xlsx]

## Sheet: Proteins
Checked	Protein FDR Confidence: Combined	Master	Accession	Description	Exp. q-value: Combined	Sum PEP Score	Coverage [%]	# Peptides	# PSMs	# Unique Peptides	# Protein Groups	# AAs	MW [kDa]	calc. pI	Score Sequest HT: Sequest HT	# Peptides (by Search Engine): Sequest HT	Abundance Ratio: (F1, 114) / (F1, 113)	Abundance Ratio: (F1, 115) / (F1, 113)	Abundance Ratio: (F1, 116) / (F1, 113)	Abundance Ratio: (F1, 117) / (F1, 113)	Abundance Ratio: (F1, 118) / (F1, 113)	Abundance Ratio: (F1, 119) / (F1, 113)	Abundances (Scaled): F1: 113, Control	Abundances (Scaled): F1: 114, Sample	Abundances (Scaled): F1: 115, Sample	Abundances (Scaled): F1: 116, Sample	Abundances (Scaled): F1: 117, Sample	Abundances (Scaled): F1: 118, Sample	Abundances (Scaled): F1: 119, Sample	Abundances Count: F1: 113, Control	Abundances Count: F1: 114, Sample	Abundances Count: F1: 115, Sample	Abundances Count: F1: 116, Sample	Abundances Count: F1: 117, Sample	Abundances Count: F1: 118, Sample	Abundances Count: F1: 119, Sample	Found in Sample: [S1] F1: 113, Control	Found in Sample: [S2] F1: 114, Sample	Found in Sample: [S3] F1: 115, Sample	Found in Sample: [S4] F1: 116, Sample	Found in Sample: [S5] F1: 117, Sample	Found in Sample: [S6] F1: 118, Sample	Found in Sample: [S7] F1: 119, Sample	Modifications
FALSE	High	Master Protein	P01023	Alpha-2-macroglobulin OS=Homo sapiens OX=9606 GN=A2M PE=1 SV=3	0	1644.54	69	99	3766	89	1	1474	163.2	6.46	14310.6	99	0.635	0.96	0.922	0.888	0.592	0.436	128.8	81.8	123.7	118.7	114.4	76.3	56.2	145	145	145	145	145	145	103	High	High	High	High	High	High	High
FALSE	High	Master Protein	P04114	Apolipoprotein B-100 OS=Homo sapiens OX=9606 GN=APOB PE=1 SV=2	0	835.406	39	162	347	162	1	4563	515.3	7.05	1220.75	162	0.902	1.498	1.083	0.967	0.836	0.528	102.7	92.7	153.9	111.2	99.4	85.9	54.3	164	164	164	164	164	164	56	High	High	High	High	High	High	High
FALSE	High	Master Protein	P02751	Fibronectin OS=Homo sapiens OX=9606 GN=FN1 PE=1 SV=4	0	754.777	45	75	402	75	1	2386	262.5	5.71	1590.53	75	1.691	2.284	1.684	1.049	2.855	3.492	49.8	84.2	113.7	83.9	52.3	142.2	173.9	105	105	105	105	104	105	82	High	High	High	High	High	High	High
FALSE	High	Master Protein	P01024	Complement C3 OS=Homo sapiens OX=9606 GN=C3 PE=1 SV=2	0	696.411	62	91	404	91	1	1663	187	6.4	1447.73	91	0.986	0.951	1.32	0.95	0.648	0.524	109.7	108.2	104.4	144.8	104.3	71.1	57.5	103	103	103	103	103	103	53	High	High	High	High	High	High	High
FALSE	High	Master Protein	P02768	Serum albumin OS=Homo sapiens OX=9606 GN=ALB PE=1 SV=2	0	605.709	81	58	587	58	1	609	69.3	6.28	2288.06	58	0.799	0.671	1.686	0.948	0.658	0.473	112.3	89.7	75.3	189.2	106.5	73.9	53.1	75	75	75	75	75	75	48	High	High	High	High	High	High	High
FALSE	High	Master Protein	P01871	Immunoglobulin heavy constant mu OS=Homo sapiens OX=9606 GN=IGHM PE=1 SV=4	0	594.707	70	44	1733	44	1	453	49.4	6.77	6536.8	44	0.959	1.058	0.877	1.232	1.254	1.779	85.8	82.3	90.8	75.3	105.7	107.6	152.6	63	63	63	63	63	63	48	High	High	High	High	High	High	High
FALSE	High	Master Protein	Q9Y6R7	IgGFc-binding protein OS=Homo sapiens OX=9606 GN=FCGBP PE=1 SV=3	0	540.422	34	82	215	82	1	5405	571.6	5.34	853.17	82	0.991	1.306	1.002	0.996	0.86	0.684	102.3	101.5	133.6	102.5	101.9	88.1	70	88	88	88	88	88	86	37	High	High	High	High	High	High	High
FALSE	High	Master Protein	P0C0L4	Complement C4-A OS=Homo sapiens OX=9606 GN=C4A PE=1 SV=2	0	429.604	45	65	219	1	1	1744	192.7	7.08	809.32	65	1.064	1.757	1	0.661	0.674	1.494	91.5	97.3	160.7	91.5	60.5	61.7	136.7	1	1	1	1	1	1	1	High	High	High	High	High	High	High
FALSE	High	Master Protein	A0A0G2JPR0	Complement C4-A OS=Homo sapiens OX=9606 GN=C4A PE=1 SV=1	0	424.368	45	65	215	1	1	1744	192.8	7.03	786.88	65	1.746	1.056	0.807	1.125	0.896	0.01	105.6	184.4	111.5	85.2	118.8	94.6		1	1	1	1	1	1		High	High	High	High	High	High	Not Found
FALSE	High	Master Protein	A0A140TA29	Complement C4-B OS=Homo sapiens OX=9606 GN=C4B PE=1 SV=1	0	418.556	44	62	216	1	1	1698	187.5	7.33	804.39	62	0.999	0.985	1.154	1.124	0.997	0.01	111.8	111.7	110.2	129.1	125.7	111.5		1	1	1	1	1	1		High	High	High	High	High	High	Not Found
FALSE	High	Master Protein	P04275	von Willebrand factor OS=Homo sapiens OX=9606 GN=VWF PE=1 SV=4	0	348.467	30	68	145	68	1	2813	309.1	5.48	525.51	68	2.314	1.512	1.12	0.858	1.306	1.049	76.4	176.8	115.5	85.6	65.6	99.8	80.2	67	67	67	67	67	67	33	High	High	High	High	High	High	High
FALSE	High	Master Protein	P00738	Haptoglobin OS=Homo sapiens OX=9606 GN=HP PE=1 SV=1	0	335.395	61	29	321	14	1	406	45.2	6.58	1204.8	29	1.217	1.114	1.832	1.693	1.336	1.275	73.9	90	82.4	135.5	125.2	98.8	94.2	23	23	23	23	23	23	19	High	High	High	High	High	High	High
FALSE	High	Master Protein	P02675	Fibrinogen beta chain OS=Homo sapiens OX=9606 GN=FGB PE=1 SV=2	0	334.531	67	27	208	27	1	491	55.9	8.27	849.87	27	1.326	0.976	0.956	0.726	0.76	0.47	112.7	149.4	109.9	107.7	81.8	85.6	52.9	39	39	39	39	39	39	23	High	High	High	High	High	High	High
FALSE	High	Master Protein	P00739	Haptoglobin-related protein OS=Homo sapiens OX=9606 GN=HPR PE=2 SV=2	0	314.453	66	23	248	8	1	348	39	7.09	924.52	23	1.001	0.993	1.182	1.254	1.256	1.66	83.9	83.9	83.3	99.1	105.2	105.4	139.3	14	14	14	14	14	14	12	High	High	High	High	High	High	High
FALSE	High	Master Protein	P04264	Keratin, type II cytoskeletal 1 OS=Homo sapiens OX=9606 GN=KRT1 PE=1 SV=6	0	301.151	48	36	164	29	1	644	66	8.12	621.79	36	1.239	0.649	0.625	0.695	2.026	2.387	81.2	100.6	52.7	50.7	56.4	164.5	193.8	35	36	35	36	36	36	32	High	High	High	High	High	High	High
FALSE	High	Master Protein	B4DPQ0	Complement C1r subcomponent OS=Homo sapiens OX=9606 GN=C1R PE=1 SV=1	0	288.129	52	28	166	28	1	719	81.8	6.37	644.85	28	1.118	0.923	1.33	0.883	1.24	1.293	89.9	100.5	83	119.6	79.4	111.5	116.3	42	42	42	42	42	42	27	High	High	High	High	High	High	High
FALSE	High	Master Protein	P02671	Fibrinogen alpha chain OS=Homo sapiens OX=9606 GN=FGA PE=1 SV=2	0	287.068	36	31	224	31	1	866	94.9	6.01	798.89	31	1.402	1.001	0.961	0.728	0.791	0.756	105.5	147.9	105.6	101.3	76.7	83.4	79.7	42	42	42	42	42	42	29	High	High	High	High	High	High	High
FALSE	High	Master Protein	P02679	Fibrinogen gamma chain OS=Homo sapiens OX=9606 GN=FGG PE=1 SV=3	0	275.568	64	25	176	16	1	453	51.5	5.62	629.77	25	1.357	0.976	0.969	0.746	0.779	0.516	110.3	149.7	107.7	107	82.4	86	56.9	24	24	24	24	24	24	11	High	High	High	High	High	High	High
FALSE	High	Master Protein	O43866	CD5 antigen-like OS=Homo sapiens OX=9606 GN=CD5L PE=1 SV=1	0	265.983	66	24	404	24	1	347	38.1	5.47	1602.53	24	0.927	1.001	0.828	1.142	1.142	1.152	97.3	90.3	97.4	80.6	111.1	111.2	112.1	28	28	28	28	28	28	21	High	High	High	High	High	High	High
FALSE	High	Master Protein	P04003	C4b-binding protein alpha chain OS=Homo sapiens OX=9606 GN=C4BPA PE=1 SV=2	0	264.806	61	28	210	28	1	597	67	7.3	774.99	28	0.956	0.897	0.864	0.885	0.984	0.964	106.9	102.2	95.9	92.4	94.5	105.1	103	39	39	39	39	39	39	29	High	High	High	High	High	High	High
FALSE	High	Master Protein	Q08380	Galectin-3-binding protein OS=Homo sapiens OX=9606 GN=LGALS3BP PE=1 SV=1	0	256.455	42	22	219	22	1	585	65.3	5.27	898.54	22	0.831	1.157	0.746	0.913	0.694	0.491	120	99.8	138.9	89.6	109.5	83.3	58.9	28	28	28	28	28	28	17	High	High	High	High	High	High	High
FALSE	High	Master Protein	P02787	Serotransferrin OS=Homo sapiens OX=9606 GN=TF PE=1 SV=3	0	256.036	57	40	115	40	1	698	77	7.12	405.61	40	1.044	0.73	1.389	1.025	0.859	0.757	102.9	107.4	75.1	142.9	105.5	88.3	77.9	44	44	44	44	44	44	26	High	High	High	High	High	High	High
FALSE	High	Master Protein	P15144	Aminopeptidase N OS=Homo sapiens OX=9606 GN=ANPEP PE=1 SV=4	0	253.86	36	36	137	36	1	967	109.5	5.48	491.63	36	4.156	1.332	0.856	0.788	0.704	0.344	76.3	316.9	101.6	65.3	60.1	53.7	26.2	42	42	42	42	42	42	14	High	High	High	High	High	High	High
FALSE	High	Master Protein	P35527	Keratin, type I cytoskeletal 9 OS=Homo sapiens OX=9606 GN=KRT9 PE=1 SV=3	0	235.281	67	31	104	30	1	623	62	5.24	382.38	31	1.719	0.786	0.85	0.911	3.376	4.516	53.2	91.4	41.8	45.2	48.5	179.6	240.2	37	37	37	37	37	37	30	High	High	High	High	High	High	High
FALSE	High	Master Protein	P01857	Immunoglobulin heavy constant gamma 1 OS=Homo sapiens OX=9606 GN=IGHG1 PE=1 SV=1	0	232.112	65	16	302	7	1	330	36.1	8.19	1239.49	16	0.948	0.994	1.295	1.164	1.04	0.817	96.4	91.5	95.9	124.9	112.3	100.3	78.8	9	9	9	9	9	9	8	High	High	High	High	High	High	High
FALSE	High	Master Protein	P02647	Apolipoprotein A-I OS=Homo sapiens OX=9606 GN=APOA1 PE=1 SV=1	0	215.495	66	18	177	18	1	267	30.8	5.76	651.94	18	0.865	0.893	1.149	1.114	1.188	1.335	92.8	80.2	82.8	106.7	103.4	110.2	123.8	26	26	26	26	26	25	22	High	High	High	High	High	High	High
FALSE	High	Master Protein	P01876	Immunoglobulin heavy constant alpha 1 OS=Homo sapiens OX=9606 GN=IGHA1 PE=1 SV=2	0	214.069	63	17	316	6	1	353	37.6	6.51	1501.42	17	1.158	1.097	0.949	1.033	1.093	0.762	98.7	114.3	108.3	93.7	102	107.9	75.2	9	9	9	9	9	9	8	High	High	High	High	High	High	High
FALSE	High	Master Protein	P13645	Keratin, type I cytoskeletal 10 OS=Homo sapiens OX=9606 GN=KRT10 PE=1 SV=6	0	199.435	49	28	103	25	1	584	58.8	5.21	394.72	28	0.89	0.465	0.435	0.546	0.776	0.58	149.1	132.8	69.4	64.9	81.5	115.8	86.5	28	28	28	28	28	28	20	High	High	High	High	High	High	High
FALSE	High	Master Protein	O75636	Ficolin-3 OS=Homo sapiens OX=9606 GN=FCN3 PE=1 SV=2	0	199.372	54	14	240	14	1	299	32.9	6.67	944.93	14	1.92	0.766	1.423	1.508	2.22	3.177	58.3	111.9	44.6	82.9	87.9	129.3	185.1	20	20	20	20	20	20	18	High	High	High	High	High	High	High
FALSE	High	Master Protein	P01833	Polymeric immunoglobulin receptor OS=Homo sapiens OX=9606 GN=PIGR PE=1 SV=4	0	198.338	42	23	91	23	1	764	83.2	5.74	371.52	23	1.486	2.223	0.683	0.75	0.751	0.561	93.9	139.6	208.8	64.1	70.4	70.5	52.7	25	25	25	25	25	25	9	High	High	High	High	High	High	High
FALSE	High	Master Protein	P35908	Keratin, type II cytoskeletal 2 epidermal OS=Homo sapiens OX=9606 GN=KRT2 PE=1 SV=2	0	195.085	56	33	90	24	1	639	65.4	8	315.35	33	0.687	0.439	0.372	0.476	0.483	0.457	178.9	123	78.4	66.5	85.1	86.4	81.8	25	25	25	25	25	25	15	High	High	High	High	High	High	High
FALSE	High	Master Protein	P01834	Immunoglobulin kappa constant OS=Homo sapiens OX=9606 GN=IGKC PE=1 SV=2	0	181.272	93	11	795	11	1	107	11.8	6.52	3143.67	11	0.969	1.146	0.946	1.242	1.276	1.272	89.2	86.4	102.2	84.4	110.7	113.7	113.4	14	14	14	14	14	14	11	High	High	High	High	High	High	High
FALSE	High	Master Protein	A0A0A0MRJ7	Coagulation factor V OS=Homo sapiens OX=9606 GN=F5 PE=1 SV=1	0	175.174	19	39	68	39	1	2229	252.1	6.05	226.89	39	1.583	0.977	0.955	1.119	0.766	0.631	99.6	157.6	97.3	95.1	111.4	76.3	62.8	41	41	41	41	41	41	13	High	High	High	High	High	High	High
FALSE	High	Master Protein	P07996	Thrombospondin-1 OS=Homo sapiens OX=9606 GN=THBS1 PE=1 SV=2	0	172.55	36	33	58	33	1	1170	129.3	4.94	227.52	33	1.485	0.996	0.586	0.747	0.665	0.388	119.3	177.2	118.9	69.9	89.1	79.4	46.3	30	30	30	30	30	30	8	High	High	High	High	High	High	High
FALSE	High	Master Protein	A0A0G2JMB2	Immunoglobulin heavy constant alpha 2 (Fragment) OS=Homo sapiens OX=9606 GN=IGHA2 PE=1 SV=1	0	170.024	70	15	210	1	1	340	36.5	6.1	942.76	15	1.114	1.266	0.915	1.034	1.247	0.638	97	108.1	122.8	88.8	100.3	121	61.9	2	2	2	2	2	2	1	High	High	High	High	High	High	High
FALSE	High	Master Protein	P01859	Immunoglobulin heavy constant gamma 2 OS=Homo sapiens OX=9606 GN=IGHG2 PE=1 SV=2	0	167.933	49	15	211	6	1	326	35.9	7.59	806	15	0.801	0.738	0.833	1.565	1.715	1.897	81.9	65.6	60.4	68.2	128.1	140.5	155.3	8	8	8	8	8	8	7	High	High	High	High	High	High	High
FALSE	High	Master Protein	P20742	Pregnancy zone protein OS=Homo sapiens OX=9606 GN=PZP PE=1 SV=4	0	163.619	16	21	577	11	1	1482	163.8	6.38	2276.62	21	0.793	0.867	0.968	0.736	0.826	0.832	116.3	92.2	100.8	112.5	85.5	96	96.7	11	11	11	11	11	11	6	High	High	High	High	High	High	High
FALSE	High	Master Protein	P01877	Immunoglobulin heavy constant alpha 2 OS=Homo sapiens OX=9606 GN=IGHA2 PE=1 SV=4	0	159.913	70	16	194	6	1	340	36.6	6.27	834.03	16	1.036	1.194	0.914	0.92	1.251	0.998	95.7	99.2	114.3	87.5	88	119.8	95.5	10	10	10	10	10	10	7	High	High	High	High	High	High	High
FALSE	High	Master Protein	P02786	Transferrin receptor protein 1 OS=Homo sapiens OX=9606 GN=TFRC PE=1 SV=2	0	152.139	40	27	51	27	1	760	84.8	6.61	197.13	27	1.731	0.9	0.84	1.115	1.334	1.337	84.8	146.7	76.3	71.2	94.5	113.1	113.4	28	28	28	28	28	28	20	High	High	High	High	High	High	High
FALSE	High	Master Protein	P0DOY2	Immunoglobulin lambda constant 2 OS=Homo sapiens OX=9606 GN=IGLC2 PE=1 SV=1	0	146.181	96	11	401	4	1	106	11.3	7.24	1607.9	11	1.203	1.046	1.06	1.301	1.412	1.687	80.4	96.7	84.1	85.2	104.6	113.5	135.6	4	4	4	4	4	4	3	High	High	High	High	High	High	High
FALSE	High	Master Protein	P08603	Complement factor H OS=Homo sapiens OX=9606 GN=CFH PE=1 SV=4	0	145.163	34	33	47	29	1	1231	139	6.61	184.34	33	1.051	1.026	1.421	1.033	0.929	0.562	99.7	104.8	102.3	141.7	103	92.6	56.1	29	29	29	29	29	29	9	High	High	High	High	High	High	High
FALSE	High	Master Protein	P02538	Keratin, type II cytoskeletal 6A OS=Homo sapiens OX=9606 GN=KRT6A PE=1 SV=3	0	142.131	50	30	66	3	1	564	60	8	229.81	30	1.361	1.556	4.478	1.473	5.391	6.11	32.8	44.6	51	146.7	48.3	176.6	200.1	3	3	3	3	3	3	3	High	High	High	High	High	High	High
FALSE	High	Master Protein	P00450	Ceruloplasmin OS=Homo sapiens OX=9606 GN=CP PE=1 SV=1	0	140.36	28	24	56	24	1	1065	122.1	5.72	206.69	24	1.065	0.78	1.3	0.86	0.664	0.377	115.8	123.3	90.3	150.6	99.5	76.8	43.7	24	24	24	24	24	24	9	High	High	High	High	High	High	High
FALSE	High	Master Protein	P13647	Keratin, type II cytoskeletal 5 OS=Homo sapiens OX=9606 GN=KRT5 PE=1 SV=3	0	139.331	48	31	64	18	1	590	62.3	7.74	216.71	31	1.408	0.938	2.27	0.952	2.053	2.858	61	85.9	57.2	138.4	58.1	125.2	174.3	20	20	20	20	20	20	16	High	High	High	High	High	High	High
FALSE	High	Master Protein	P04259	Keratin, type II cytoskeletal 6B OS=Homo sapiens OX=9606 GN=KRT6B PE=1 SV=5	0	137.742	48	29	63	2	1	564	60	8	221.85	29	1.153	1.107	3.741	1.123	4.282	5.94	38.2	44	42.2	142.7	42.9	163.4	226.6	2	2	2	2	2	2	2	High	High	High	High	High	High	High
FALSE	High	Master Protein	A0A0B4J231	Immunoglobulin lambda-like polypeptide 5 OS=Homo sapiens OX=9606 GN=IGLL5 PE=1 SV=1	0	137.314	51	10	315	3	1	215	23.1	8.84	1255.12	10	1.124	1.076	0.974	1.288	1.268	1.408	86	96.7	92.5	83.8	110.8	109.1	121.1	3	3	3	3	3	3	3	High	High	High	High	High	High	High
FALSE	High	Master Protein	J3KQ66	Reelin OS=Homo sapiens OX=9606 GN=RELN PE=1 SV=1	0	136.421	13	33	51	33	1	3460	388.2	5.88	168.79	33	1.274	0.928	0.798	0.83	0.791	0.414	116	147.8	107.6	92.5	96.3	91.7	48	31	31	31	31	31	31	8	High	High	High	High	High	High	High
FALSE	High	Master Protein	P68871	Hemoglobin subunit beta OS=Homo sapiens OX=9606 GN=HBB PE=1 SV=2	0	133.46	78	10	121	5	1	147	16	7.28	473.99	10	0.966	1.048	1.443	1.306	1.513	1.648	78.4	75.8	82.2	113.1	102.5	118.7	129.3	7	7	7	7	7	7	6	High	High	High	High	High	High	High
FALSE	High	Master Protein	P00747	Plasminogen OS=Homo sapiens OX=9606 GN=PLG PE=1 SV=2	0	133.104	46	28	51	28	1	810	90.5	7.24	177.9	28	0.797	0.866	1.053	0.772	0.602	0.441	126.6	100.8	109.6	133.2	97.7	76.2	55.9	29	29	29	29	29	29	7	High	High	High	High	High	High	High
FALSE	High	Master Protein	P01591	Immunoglobulin J chain OS=Homo sapiens OX=9606 GN=JCHAIN PE=1 SV=4	0	132.365	71	9	210	9	1	159	18.1	5.24	684.6	9	1.016	1.128	0.864	1.142	1.169	1.223	92.8	94.3	104.7	80.2	105.9	108.5	113.5	14	14	14	14	14	14	8	High	High	High	High	High	High	High
FALSE	High	Master Protein	A0A0S2Z4L3	Protein S isoform 2 (Fragment) OS=Homo sapiens OX=9606 GN=PROS1 PE=2 SV=1	0	127.546	33	19	55	19	1	708	78.8	5.74	209.05	19	1.009	0.94	0.996	1.007	1.027	0.883	102	102.9	95.9	101.6	102.7	104.8	90.1	17	17	17	17	17	17	9	High	High	High	High	High	High	High
FALSE	High	Master Protein	P01860	Immunoglobulin heavy constant gamma 3 OS=Homo sapiens OX=9606 GN=IGHG3 PE=1 SV=2	0	126.87	55	16	169	6	1	377	41.3	7.9	615.74	16	0.6	0.494	0.58	0.712	0.83	0.309	154.7	92.8	76.4	89.7	110.2	128.4	47.8	7	7	7	7	7	7	4	High	High	High	High	High	High	High
FALSE	High	Master Protein	A0A0A0MSD0	Sushi, von Willebrand factor type A, EGF and pentraxin domain-containing protein 1 OS=Homo sapiens OX=9606 GN=SVEP1 PE=1 SV=1	0	123.288	11	33	47	33	1	3574	390.2	5.5	145.22	33	1.139	0.778	0.723	0.744	0.778	0.651	120.4	137.1	93.7	87.1	89.6	93.7	78.4	32	32	32	32	32	32	14	High	High	High	High	High	High	High
FALSE	High	Master Protein	P69905	Hemoglobin subunit alpha OS=Homo sapiens OX=9606 GN=HBA1 PE=1 SV=2	0	123.199	82	8	101	8	1	142	15.2	8.68	372.47	8	1.043	1.136	1.58	1.455	1.61	1.926	71.8	74.9	81.5	113.5	104.5	115.6	138.3	12	12	12	12	12	12	10	High	High	High	High	High	High	High
FALSE	High	Master Protein	P10909	Clusterin OS=Homo sapiens OX=9606 GN=CLU PE=1 SV=1	0	118.671	34	15	68	15	1	449	52.5	6.27	250.42	15	0.861	0.887	0.898	0.714	0.778	0.714	119.6	102.9	106.1	107.4	85.5	93.1	85.4	16	16	16	16	16	15	11	High	High	High	High	High	High	High
FALSE	High	Master Protein	P02649	Apolipoprotein E OS=Homo sapiens OX=9606 GN=APOE PE=1 SV=1	0	118.027	65	21	59	21	1	317	36.1	5.73	211.23	21	1.794	1.687	0.982	0.778	0.635	0.455	95.5	171.3	161.1	93.7	74.3	60.6	43.5	22	22	22	22	22	22	10	High	High	High	High	High	High	High
FALSE	High	Master Protein	P01009	Alpha-1-antitrypsin OS=Homo sapiens OX=9606 GN=SERPINA1 PE=1 SV=3	0	117.239	40	18	60	1	1	418	46.7	5.59	209.06	18	1.101	0.956	1.29	0.899	0.773	0.01	116.3	128	111.1	150	104.6	89.9		1	1	1	1	1	1		High	High	High	High	High	High	Not Found
FALSE	High	Master Protein	P48740	Mannan-binding lectin serine protease 1 OS=Homo sapiens OX=9606 GN=MASP1 PE=1 SV=3	0	116.649	32	19	56	7	1	699	79.2	5.49	195.86	19	1.491	1.205	1.229	1.384	2.037	2.05	67.3	100.4	81.2	82.8	93.2	137.1	138	7	7	7	7	7	7	6	High	High	High	High	High	High	High
FALSE	High	Master Protein	P01031	Complement C5 OS=Homo sapiens OX=9606 GN=C5 PE=1 SV=4	0	114.409	21	33	48	33	1	1676	188.2	6.52	153.98	33	1.006	1.025	1.082	0.844	0.744	0.59	111.3	111.9	114	120.4	93.9	82.8	65.6	33	33	33	33	33	33	12	High	High	High	High	High	High	High
FALSE	High	Master Protein	A0A024R6I7	Alpha-1-antitrypsin OS=Homo sapiens OX=9606 GN=SERPINA1 PE=1 SV=1	0	111.765	40	18	55	1	1	418	46.7	5.59	187	18	1.017	0.897	1.337	10.069	1.006	0.01	45.7	46.5	40.9	61.1	459.9	46		1	1	1	1	1	1		High	High	High	High	High	High	Not Found
FALSE	High	Master Protein	P55072	Transitional endoplasmic reticulum ATPase OS=Homo sapiens OX=9606 GN=VCP PE=1 SV=4	0	111.552	39	24	37	24	1	806	89.3	5.26	137.37	24	1.577	0.646	0.53	0.521	0.941	0.773	116.9	184.3	75.5	62	60.9	110	90.4	23	23	23	23	23	23	10	High	High	High	High	High	High	High
FALSE	High	Master Protein	C9JU00	Fibrinogen gamma chain (Fragment) OS=Homo sapiens OX=9606 GN=FGG PE=1 SV=1	0	107.484	86	10	62	1	1	123	14	7.2	238.66	10	1.372	0.942	0.794	0.574	0.612	0.23	126.7	173.9	119.3	100.6	72.7	77.6	29.2	2	2	2	2	2	2	1	High	High	High	High	High	High	High
FALSE	High	Master Protein	Q13201	Multimerin-1 OS=Homo sapiens OX=9606 GN=MMRN1 PE=1 SV=3	0	105.515	25	25	41	25	1	1228	138	7.93	148.07	25	1.799	1.058	0.862	1.172	0.627	0.365	101.7	183	107.6	87.7	119.2	63.7	37.1	25	25	25	25	25	25	8	High	High	High	High	High	High	High
FALSE	High	Master Protein	P02533	Keratin, type I cytoskeletal 14 OS=Homo sapiens OX=9606 GN=KRT14 PE=1 SV=4	0	104.743	48	23	50	8	1	472	51.5	5.16	175	23	1.362	1.061	2.713	1.12	3.615	4.522	45.5	61.9	48.3	123.4	50.9	164.4	205.6	8	8	8	8	8	8	7	High	High	High	High	High	High	High
FALSE	High	Master Protein	P08514	Integrin alpha-IIb OS=Homo sapiens OX=9606 GN=ITGA2B PE=1 SV=3	0	104.285	27	21	38	21	1	1039	113.3	5.38	128.96	21	0.745	0.537	0.777	0.703	0.747	0.718	133.9	99.7	71.9	104.1	94.2	100	96.2	20	20	20	20	20	20	7	High	High	High	High	High	High	High
FALSE	High	Master Protein	P49747	Cartilage oligomeric matrix protein OS=Homo sapiens OX=9606 GN=COMP PE=1 SV=2	0	101.462	45	22	38	20	1	757	82.8	4.6	135.59	22	1.236	0.99	1.095	1.11	6.263	7.845	35.8	44.3	35.5	39.2	39.8	224.4	281.1	18	18	18	18	18	18	13	High	High	High	High	High	High	High
FALSE	High	Master Protein	P08779	Keratin, type I cytoskeletal 16 OS=Homo sapiens OX=9606 GN=KRT16 PE=1 SV=4	0	99.758	50	21	46	10	1	473	51.2	5.05	160.34	21	0.943	1.194	2.504	0.931	2.466	2.139	62.6	59	74.8	156.8	58.3	154.5	134	11	11	11	11	11	11	6	High	High	High	High	High	High	High
FALSE	High	Master Protein	P08519	Apolipoprotein(a) OS=Homo sapiens OX=9606 GN=LPA PE=1 SV=1	0	99.55	33	23	41	23	1	4548	501	5.88	147.07	23	0.79	2.574	0.917	0.883	0.906	0.664	90.5	71.5	233	83	79.9	82	60.1	24	24	24	24	24	23	10	High	High	High	High	High	High	High
FALSE	High	Master Protein	O14791	Apolipoprotein L1 OS=Homo sapiens OX=9606 GN=APOL1 PE=1 SV=5	0	96.735	30	16	56	16	1	398	43.9	5.81	200.43	16	0.645	0.71	0.938	0.856	0.88	0.996	116.2	74.9	82.5	109	99.5	102.2	115.7	16	16	16	16	16	16	14	High	High	High	High	High	High	High
FALSE	High	Master Protein	P05106	Integrin beta-3 OS=Homo sapiens OX=9606 GN=ITGB3 PE=1 SV=2	0	95.922	34	21	35	21	1	788	87	5.24	126.23	21	0.703	0.522	0.752	0.674	0.705	0.577	141.9	99.8	74.1	106.7	95.7	100	81.9	20	20	20	20	20	20	8	High	High	High	High	High	High	High
FALSE	High	Master Protein	P02042	Hemoglobin subunit delta OS=Homo sapiens OX=9606 GN=HBD PE=1 SV=2	0	93.469	78	10	75	5	1	147	16	8.05	282.29	10	0.837	0.96	1.353	1.285	1.178	1.592	85.3	71.4	81.9	115.4	109.6	100.5	135.8	6	6	6	6	6	6	5	High	High	High	High	High	High	High
FALSE	High	Master Protein	A0A286YFJ8	Immunoglobulin heavy constant gamma 4 (Fragment) OS=Homo sapiens OX=9606 GN=IGHG4 PE=1 SV=1	0	93.381	48	12	78	6	1	396	43.8	6.24	284.17	12	1.021	0.875	1.092	1.193	1.058	0.558	103	105.2	90.1	112.5	122.8	109	57.5	9	9	9	9	9	9	4	High	High	High	High	High	High	High
FALSE	High	Master Protein	A0M8Q6	Immunoglobulin lambda constant 7 OS=Homo sapiens OX=9606 GN=IGLC7 PE=1 SV=3	0	92.366	65	7	246	2	1	106	11.2	8.29	1068.73	7	1.255	0.736	0.924	0.922	0.969	0.657	108.3	135.9	79.7	100.1	99.9	105	71.2	2	2	2	2	2	2	2	High	High	High	High	High	High	High
FALSE	High	Master Protein	P02790	Hemopexin OS=Homo sapiens OX=9606 GN=HPX PE=1 SV=2	0	84.182	32	13	32	13	1	462	51.6	7.02	137.99	13	1.047	0.772	1.593	0.929	0.747	0.362	108.5	113.7	83.8	172.9	100.8	81.1	39.2	13	13	13	13	13	13	5	High	High	High	High	High	High	High
FALSE	High	Master Protein	P19827	Inter-alpha-trypsin inhibitor heavy chain H1 OS=Homo sapiens OX=9606 GN=ITIH1 PE=1 SV=3	0	82.911	22	15	24	15	1	911	101.3	6.79	94.37	15	0.884	0.838	1.194	0.976	0.799	0.441	114.1	100.9	95.7	136.3	111.4	91.3	50.3	15	15	15	15	15	15	5	High	High	High	High	High	High	High
FALSE	High	Master Protein	F8W876	Mannan-binding lectin serine protease 1 OS=Homo sapiens OX=9606 GN=MASP1 PE=1 SV=1	0	79.533	43	13	38	1	1	354	40.6	4.63	138.27	13	1.934	1.022	1.568	1.671	2.314	0.01	73.6	142.4	75.2	115.4	123	170.4		1	1	1	1	1	1		High	High	High	High	High	High	Not Found
FALSE	High	Master Protein	P60709	Actin, cytoplasmic 1 OS=Homo sapiens OX=9606 GN=ACTB PE=1 SV=1	0	79.529	38	11	33	4	1	375	41.7	5.48	113.92	11	0.882	0.822	0.82	0.765	0.926	0.742	117.5	103.6	96.6	96.4	89.9	108.8	87.2	5	5	5	5	5	5	4	High	High	High	High	High	High	High
FALSE	High	Master Protein	P19823	Inter-alpha-trypsin inhibitor heavy chain H2 OS=Homo sapiens OX=9606 GN=ITIH2 PE=1 SV=2	0	75.366	24	19	33	19	1	946	106.4	6.86	107.9	19	0.839	0.762	1.019	0.849	0.752	0.399	124.6	104.4	94.9	127	105.7	93.7	49.7	18	18	18	18	18	18	4	High	High	High	High	High	High	High
FALSE	High	Master Protein	P01042	Kininogen-1 OS=Homo sapiens OX=9606 GN=KNG1 PE=1 SV=2	0	74.383	31	18	26	18	1	644	71.9	6.81	97.3	18	0.954	0.881	0.999	0.861	0.66	0.413	121.3	115.8	106.9	121.2	104.4	80.1	50.2	18	18	18	18	18	18	5	High	High	High	High	High	High	High
FALSE	High	Master Protein	Q04695	Keratin, type I cytoskeletal 17 OS=Homo sapiens OX=9606 GN=KRT17 PE=1 SV=2	0	74.12	45	20	34	12	1	432	48.1	5.02	115.6	20	1.356	1.645	6.095	1.374	4	4.747	34.6	47	56.9	211	47.6	138.5	164.4	12	12	12	12	12	12	9	High	High	High	High	High	High	High
FALSE	High	Master Protein	Q15485	Ficolin-2 OS=Homo sapiens OX=9606 GN=FCN2 PE=1 SV=2	0	73.558	34	9	37	8	1	313	34	6.77	128.8	9	1.545	1.399	1.169	1.611	2.814	3.775	52.6	81.2	73.5	61.5	84.7	148	198.5	11	11	11	11	11	11	9	High	High	High	High	High	High	High
FALSE	High	Master Protein	A0A0C4DH38	Immunoglobulin heavy variable 5-51 OS=Homo sapiens OX=9606 GN=IGHV5-51 PE=3 SV=1	0	73.168	53	5	76	5	1	117	12.7	8.27	289.36	5	1.095	1.011	0.868	1.102	1.035	1.113	96.9	106.1	98	84.1	106.7	100.3	107.9	9	9	9	9	9	9	7	High	High	High	High	High	High	High
FALSE	High	Master Protein	P06727	Apolipoprotein A-IV OS=Homo sapiens OX=9606 GN=APOA4 PE=1 SV=3	0	72.742	58	19	26	19	1	396	45.4	5.38	93.84	19	1.091	1.131	1.257	1.455	0.875	0.744	92.7	101.1	104.8	116.5	134.8	81.1	69	18	18	18	18	18	18	5	High	High	High	High	High	High	High
FALSE	High	Master Protein	P02746	Complement C1q subcomponent subunit B OS=Homo sapiens OX=9606 GN=C1QB PE=1 SV=3	0	71.046	31	6	50	6	1	253	26.7	8.63	160.24	6	0.631	0.585	0.695	0.844	1.441	2.23	94.2	59.5	55.2	65.5	79.6	135.8	210.2	11	11	11	11	11	11	8	High	High	High	High	High	High	High
FALSE	High	Master Protein	P26038	Moesin OS=Homo sapiens OX=9606 GN=MSN PE=1 SV=3	0	70.902	29	19	33	12	1	577	67.8	6.4	99.22	19	1.166	0.85	1.018	1.1	1.099	1.078	95.7	111.6	81.4	97.4	105.3	105.2	103.3	12	12	12	12	12	12	8	High	High	High	High	High	High	High
FALSE	High	Master Protein	P27487	Dipeptidyl peptidase 4 OS=Homo sapiens OX=9606 GN=DPP4 PE=1 SV=2	0	70.681	22	17	32	17	1	766	88.2	6.04	106.3	17	3.342	1.132	0.85	0.871	0.739	0.503	83	277.3	93.9	70.5	72.3	61.3	41.7	16	16	16	16	16	16	7	High	High	High	High	High	High	High
FALSE	High	Master Protein	P19440	Glutathione hydrolase 1 proenzyme OS=Homo sapiens OX=9606 GN=GGT1 PE=1 SV=2	0	70.182	26	14	29	14	1	569	61.4	7.12	105.32	14	3.447	1.572	0.839	0.861	0.786	0.953	74	255.1	116.4	62.1	63.7	58.2	70.5	14	14	14	14	13	13	6	High	High	High	High	High	High	High
FALSE	High	Master Protein	P02748	Complement component C9 OS=Homo sapiens OX=9606 GN=C9 PE=1 SV=2	0	68.178	28	15	26	15	1	559	63.1	5.59	84.87	15	0.799	0.767	0.706	0.681	0.566	0.248	146.8	117.4	112.6	103.7	100	83.1	36.5	14	14	14	14	14	14	6	High	High	High	High	High	High	High
FALSE	High	Master Protein	Q14624	Inter-alpha-trypsin inhibitor heavy chain H4 OS=Homo sapiens OX=9606 GN=ITIH4 PE=1 SV=4	0	64.558	23	16	23	16	1	930	103.3	6.98	78.98	16	1.02	0.925	1.084	0.892	0.896	0.671	107.9	110.1	99.8	116.9	96.2	96.7	72.4	15	15	15	15	15	15	8	High	High	High	High	High	High	High
FALSE	High	Master Protein	P01763	Immunoglobulin heavy variable 3-48 OS=Homo sapiens OX=9606 GN=IGHV3-48 PE=1 SV=2	0	63.994	35	3	75	1	1	117	12.8	5.36	243.35	3	0.851	1.12	0.609	0.929	0.927	0.243	123.3	104.9	138	75.1	114.5	114.3	29.9	3	3	3	3	3	3	1	High	High	High	High	High	High	High
FALSE	High	Master Protein	P0DP03	Immunoglobulin heavy variable 3-30-5 OS=Homo sapiens OX=9606 GN=IGHV3-30-5 PE=3 SV=1	0	63.442	54	5	71	1	1	117	12.9	8.92	228.8	5	0.703	0.678	0.621	0.765	0.859	0.223	144.3	101.4	97.8	89.7	110.4	124	32.2	1	1	1	1	1	1	1	High	High	High	High	High	High	High
FALSE	High	Master Protein	P11142	Heat shock cognate 71 kDa protein OS=Homo sapiens OX=9606 GN=HSPA8 PE=1 SV=1	0	63.356	31	18	23	14	1	646	70.9	5.52	77.75	18	1.146	0.98	0.871	0.989	1.057	0.93	100.4	115	98.4	87.5	99.3	106.1	93.4	14	14	14	14	14	14	7	High	High	High	High	High	High	High
FALSE	High	Master Protein	P01764	Immunoglobulin heavy variable 3-23 OS=Homo sapiens OX=9606 GN=IGHV3-23 PE=1 SV=2	0	61.533	54	4	61	2	1	117	12.6	8.28	223.67	4	0.625	0.648	0.57	0.908	0.775	0.499	139.3	87	90.3	79.4	126.5	108	69.6	2	2	2	2	2	2	2	High	High	High	High	High	High	High
FALSE	High	Master Protein	P68032	Actin, alpha cardiac muscle 1 OS=Homo sapiens OX=9606 GN=ACTC1 PE=1 SV=1	0	60.331	25	8	27	1	1	377	42	5.39	83.11	8	0.891	0.721	0.788	0.702	1.069	0.523	122.9	109.6	88.6	96.9	86.3	131.4	64.3	1	1	1	1	1	1	1	High	High	High	High	High	High	High
FALSE	High	Master Protein	A0A0B4J1V1	Immunoglobulin heavy variable 3-21 OS=Homo sapiens OX=9606 GN=IGHV3-21 PE=1 SV=1	0	60.28	54	4	71	2	1	117	12.8	8.28	225.05	4	0.855	0.842	0.927	1.183	1.009	0.482	111.2	95	93.6	103	131.5	112.2	53.6	6	6	6	6	6	6	1	High	High	High	High	High	High	High
FALSE	High	Master Protein	P02760	Protein AMBP OS=Homo sapiens OX=9606 GN=AMBP PE=1 SV=1	0	60.115	36	11	23	11	1	352	39	6.25	85.23	11	0.97	0.842	1.158	1.014	0.892	0.656	107.2	103.9	90.2	124.1	108.7	95.6	70.3	12	12	12	12	12	12	4	High	High	High	High	High	High	High
FALSE	High	Master Protein	P01619	Immunoglobulin kappa variable 3-20 OS=Homo sapiens OX=9606 GN=IGKV3-20 PE=1 SV=2	0	60.06	47	5	56	3	1	116	12.5	4.96	224.37	5	0.884	0.781	0.736	0.998	0.818	0.956	113.4	100.2	88.6	83.4	113.2	92.8	108.4	6	6	6	6	6	6	6	High	High	High	High	High	High	High
FALSE	High	Master Protein	A0A075B6S5	Immunoglobulin kappa variable 1-27 OS=Homo sapiens OX=9606 GN=IGKV1-27 PE=3 SV=1	0	59.713	54	3	68	2	1	117	12.7	8.29	208.47	3	1.117	0.976	0.833	1.147	1.261	1.501	89.4	99.8	87.2	74.4	102.5	112.6	134.1	3	3	3	3	3	3	3	High	High	High	High	High	High	High
FALSE	High	Master Protein	O95810	Caveolae-associated protein 2 OS=Homo sapiens OX=9606 GN=CAVIN2 PE=1 SV=3	0	57.591	37	11	20	11	1	425	47.1	5.21	74.61	11	0.941	1.041	0.943	0.788	2.349	3.197	68.2	64.2	71	64.3	53.8	160.3	218.2	11	11	11	11	11	11	9	High	High	High	High	High	High	High
FALSE	High	Master Protein	Q5VZU9	Tripeptidyl-peptidase 2 OS=Homo sapiens OX=9606 GN=TPP2 PE=1 SV=1	0	57.53	17	18	22	18	1	1262	139.7	6.52	65.88	18	0.764	0.715	0.669	0.657	0.62	0.817	133.5	102	95.5	89.3	87.8	82.7	109.1	18	18	18	18	17	17	10	High	High	High	High	High	High	High
FALSE	High	Master Protein	P01772	Immunoglobulin heavy variable 3-33 OS=Homo sapiens OX=9606 GN=IGHV3-33 PE=1 SV=2	0	57.111	54	5	75	1	1	117	13.1	8.94	232.8	5	0.922	1.041	0.792	0.958	3.592	1.779	69.4	64	72.2	55	66.5	249.4	123.5	1	1	1	1	1	1	1	High	High	High	High	High	High	High
FALSE	High	Master Protein	P04004	Vitronectin OS=Homo sapiens OX=9606 GN=VTN PE=1 SV=1	0	55.024	27	10	26	10	1	478	54.3	5.8	98.5	10	0.861	0.819	0.853	0.801	0.755	0.213	132	113.7	108.1	112.7	105.7	99.6	28.1	10	10	10	10	9	9	2	High	High	High	High	High	High	High
FALSE	High	Master Protein	A0A0J9YY99	Uncharacterized protein (Fragment) OS=Homo sapiens OX=9606 PE=1 SV=1	0	54.154	49	5	68	1	1	117	13	8.92	209.27	5	0.911	0.887	0.776	0.858	0.752	0.312	127.4	116.1	112.9	98.8	109.3	95.8	39.8	1	1	1	1	1	1	1	High	High	High	High	High	High	High
FALSE	High	Master Protein	P02792	Ferritin light chain OS=Homo sapiens OX=9606 GN=FTL PE=1 SV=2	0	54.097	62	10	21	10	1	175	20	5.78	76.61	10	1.016	1.443	0.638	0.596	0.927	0.823	108.6	110.4	156.8	69.3	64.8	100.7	89.4	10	10	10	10	10	9	6	High	High	High	High	High	High	High
FALSE	High	Master Protein	P19652	Alpha-1-acid glycoprotein 2 OS=Homo sapiens OX=9606 GN=ORM2 PE=1 SV=2	0	53.361	39	9	23	6	1	201	23.6	5.11	83.52	9	1.226	1.003	1.255	1.373	1.034	0.861	90.3	110.7	90.5	113.3	124	93.4	77.7	5	5	5	5	5	5	2	High	High	High	High	High	High	High
FALSE	High	Master Protein	P01743	Immunoglobulin heavy variable 1-46 OS=Homo sapiens OX=9606 GN=IGHV1-46 PE=1 SV=2	0	53.322	62	5	42	3	1	117	12.9	8.92	108.43	5	0.917	0.958	0.887	1.398	0.943	0.586	104.6	96	100.2	92.8	146.3	98.6	61.4	7	7	7	7	7	7	2	High	High	High	High	High	High	High
FALSE	High	Master Protein	P06331	Immunoglobulin heavy variable 4-34 OS=Homo sapiens OX=9606 GN=IGHV4-34 PE=1 SV=2	0	53.272	42	4	46	1	1	123	13.8	9.33	194.41	4	0.742	0.682	0.64	0.983	0.617	1.047	122.6	91	83.5	78.5	120.4	75.7	128.4	2	2	2	2	2	2	2	High	High	High	High	High	High	High
FALSE	High	Master Protein	P20851	C4b-binding protein beta chain OS=Homo sapiens OX=9606 GN=C4BPB PE=1 SV=1	0	53.043	46	9	23	9	1	252	28.3	5.14	78.14	9	0.953	0.919	0.976	1.069	0.975	1.076	100.5	95.8	92.3	98	107.4	97.9	108.1	9	9	9	9	9	9	6	High	High	High	High	High	High	High
FALSE	High	Master Protein	P02730	Band 3 anion transport protein OS=Homo sapiens OX=9606 GN=SLC4A1 PE=1 SV=3	0	52.521	18	13	22	13	1	911	101.7	5.19	70.58	13	0.688	0.58	0.519	0.578	0.57	0.32	164.5	113.2	95.4	85.4	95.1	93.8	52.6	12	12	12	12	12	12	3	High	High	High	High	High	High	High
FALSE	High	Master Protein	P21589	5'-nucleotidase OS=Homo sapiens OX=9606 GN=NT5E PE=1 SV=1	0	52.193	26	12	19	12	1	574	63.3	7.03	66.29	12	4.312	1.364	0.873	0.834	0.708	0.474	73.2	315.6	99.8	63.9	61.1	51.8	34.7	12	12	12	12	12	12	5	High	High	High	High	High	High	High
FALSE	High	Master Protein	D6RF35	Vitamin D-binding protein OS=Homo sapiens OX=9606 GN=GC PE=1 SV=1	0	51.749	30	11	19	11	1	476	53	5.52	62.91	11	0.864	0.718	1.352	0.785	0.677	0.557	117.6	101.6	84.4	159	92.3	79.6	65.5	12	12	12	12	12	12	5	High	High	High	High	High	High	High
FALSE	High	Master Protein	P01780	Immunoglobulin heavy variable 3-7 OS=Homo sapiens OX=9606 GN=IGHV3-7 PE=1 SV=2	0	51.727	32	4	83	2	1	117	12.9	6.57	247.2	4	1.117	0.976	1.033	1.662	1.647	2.647	69.4	77.6	67.8	71.7	115.4	114.3	183.8	3	3	3	3	3	3	3	High	High	High	High	High	High	High
FALSE	High	Master Protein	P02749	Beta-2-glycoprotein 1 OS=Homo sapiens OX=9606 GN=APOH PE=1 SV=3	0	51.323	29	8	19	8	1	345	38.3	7.97	76.99	8	0.999	0.608	1.038	0.709	0.899	0.854	114.6	114.5	69.7	119	81.3	103	97.9	8	8	8	8	8	8	4	High	High	High	High	High	High	High
FALSE	High	Master Protein	P11226	Mannose-binding protein C OS=Homo sapiens OX=9606 GN=MBL2 PE=1 SV=2	0	51.038	43	9	24	9	1	248	26.1	5.49	86.19	9	1.579	1.919	1.329	1.196	2.192	2.541	59.6	94	114.3	79.1	71.2	130.5	151.3	9	9	9	9	9	9	7	High	High	High	High	High	High	High
FALSE	High	Master Protein	P01782	Immunoglobulin heavy variable 3-9 OS=Homo sapiens OX=9606 GN=IGHV3-9 PE=1 SV=2	0	50.846	53	4	48	3	1	118	12.9	7.08	173.05	4	0.967	1.046	0.886	1.142	1.155	0.902	98.6	95.4	103.1	87.4	112.6	113.9	88.9	5	5	5	5	5	5	4	High	High	High	High	High	High	High
FALSE	High	Master Protein	A0A0C4DH41	Immunoglobulin heavy variable 4-61 OS=Homo sapiens OX=9606 GN=IGHV4-61 PE=3 SV=1	0	50.279	46	5	64	2	1	118	13.1	9.29	204.36	5	0.925	0.972	0.929	1.447	1.224	0.343	102.3	94.7	99.5	95.1	148.1	125.3	35.1	3	3	3	3	3	3	1	High	High	High	High	High	High	High
FALSE	High	Master Protein	Q8NI99	Angiopoietin-related protein 6 OS=Homo sapiens OX=9606 GN=ANGPTL6 PE=1 SV=1	0	50.03	36	11	14	11	1	470	51.7	8.53	61.76	11	1.025	1.017	0.9	0.984	1.354	0.576	102.1	104.7	103.8	91.9	100.5	138.3	58.8	10	10	10	10	10	10	3	High	High	High	High	High	High	High
FALSE	High	Master Protein	P08473	Neprilysin OS=Homo sapiens OX=9606 GN=MME PE=1 SV=2	0	49.894	18	12	17	12	1	750	85.5	5.73	59.29	12	3.254	1.135	0.991	1.092	0.797	0.114	83.5	271.7	94.8	82.8	91.2	66.6	9.5	11	11	11	11	11	11	1	High	High	High	High	High	High	High
FALSE	High	Master Protein	P02747	Complement C1q subcomponent subunit C OS=Homo sapiens OX=9606 GN=C1QC PE=1 SV=3	0	49.792	25	5	26	5	1	245	25.8	8.41	95.18	5	0.755	0.779	0.814	0.887	1.25	1.25	103.9	78.5	81	84.6	92.2	129.9	129.9	6	6	6	6	6	6	6	High	High	High	High	High	High	High
FALSE	High	Master Protein	P04432	Immunoglobulin kappa variable 1D-39 OS=Homo sapiens OX=9606 GN=IGKV1D-39 PE=3 SV=2	0	49.192	29	2	104	1	1	117	12.7	8.66	304.78	2	0.639	0.737	0.763	1.012	0.857	1.423	108.9	69.5	80.3	83	110.1	93.3	154.9	2	2	2	2	2	2	2	High	High	High	High	High	High	High
FALSE	High	Master Protein	A0A0C4DH42	Immunoglobulin heavy variable 3-66 OS=Homo sapiens OX=9606 GN=IGHV3-66 PE=3 SV=1	0	49.16	35	3	68	1	1	116	12.7	8.16	221.39	3	0.91	0.995	0.892	1.306	1.031	0.01	114.1	103.9	113.5	101.8	149	117.7		3	3	3	3	3	3		High	High	High	High	High	High	Not Found
FALSE	High	Master Protein	F5H5D3	Tubulin alpha chain OS=Homo sapiens OX=9606 GN=TUBA1C PE=1 SV=1	0	48.632	25	10	16	3	1	519	57.7	5.07	57.59	10	0.463	0.419	0.83	0.291	0.45	0.01	202.6	93.9	85	168.3	59.1	91.2		3	3	3	3	3	3		High	High	High	High	High	High	Not Found
FALSE	High	Master Protein	P06396	Gelsolin OS=Homo sapiens OX=9606 GN=GSN PE=1 SV=1	0	48.5	19	13	18	13	1	782	85.6	6.28	61.21	13	1.138	0.901	1.122	1.078	0.906	1.098	96.6	110	87.1	108.4	104.2	87.5	106.1	13	13	13	13	13	13	6	High	High	High	High	High	High	High
FALSE	High	Master Protein	P23229	Integrin alpha-6 OS=Homo sapiens OX=9606 GN=ITGA6 PE=1 SV=5	0	48.146	18	15	17	15	1	1130	126.5	6.61	52.26	15	0.594	0.48	0.772	0.629	0.711	0.487	149.8	89	71.9	115.6	94.2	106.6	73	14	14	14	14	14	14	4	High	High	High	High	High	High	High
FALSE	High	Master Protein	P32119	Peroxiredoxin-2 OS=Homo sapiens OX=9606 GN=PRDX2 PE=1 SV=5	0	47.995	40	8	21	8	1	198	21.9	5.97	78.52	8	0.541	0.516	0.307	0.63	0.591	0.793	159.9	86.5	82.5	49.1	100.7	94.5	126.7	7	7	7	7	7	7	7	High	High	High	High	High	High	High
FALSE	High	Master Protein	P01824	Immunoglobulin heavy variable 4-39 OS=Homo sapiens OX=9606 GN=IGHV4-39 PE=1 SV=2	0	47.888	42	4	73	1	1	125	13.9	9.26	203.74	4	0.951	1.08	0.869	1.187	1.177	0.23	107.8	102.5	116.4	93.6	128	126.9	24.7	2	2	2	2	2	2	1	High	High	High	High	High	High	High
FALSE	High	Master Protein	P04430	Immunoglobulin kappa variable 1-16 OS=Homo sapiens OX=9606 GN=IGKV1-16 PE=1 SV=2	0	47.855	29	2	23	2	1	117	12.6	8.16	102.72	2	0.949	0.93	0.77	1.201	1.11	0.92	101.8	96.5	94.6	78.4	122.2	113	93.6	4	4	4	4	4	4	4	High	High	High	High	High	High	High
FALSE	High	Master Protein	P18428	Lipopolysaccharide-binding protein OS=Homo sapiens OX=9606 GN=LBP PE=1 SV=3	0	47.743	19	9	20	9	1	481	53.4	6.7	66.93	9	0.612	0.557	0.57	0.628	0.41	0.19	176.4	107.9	98.3	100.5	110.9	72.4	33.6	10	10	10	10	10	10	2	High	High	High	High	High	High	High
FALSE	High	Master Protein	B1AHL2	Fibulin-1 OS=Homo sapiens OX=9606 GN=FBLN1 PE=1 SV=1	0	46.942	20	9	16	2	1	721	78.3	5.39	56.05	9	0.976	1.165	1.171	1.235	1.204	1.457	85.3	83.3	99.4	99.8	105.3	102.7	124.3	2	2	2	2	2	2	1	High	High	High	High	High	High	High
FALSE	High	Master Protein	S4R460	Immunoglobulin heavy variable 3/OR16-9 (non-functional) OS=Homo sapiens OX=9606 GN=IGHV3OR16-9 PE=1 SV=2	0	46.697	60	4	77	3	1	96	10.4	7.97	367.29	4	1.033	1.153	0.892	1.116	1.049	0.561	102.9	106.3	118.6	91.7	114.8	107.9	57.8	3	3	3	3	3	3	2	High	High	High	High	High	High	High
FALSE	High	Master Protein	P02763	Alpha-1-acid glycoprotein 1 OS=Homo sapiens OX=9606 GN=ORM1 PE=1 SV=1	0	46.423	40	8	23	5	1	201	23.5	5.02	78.32	8	1.314	1.107	1.482	0.912	0.826	0.279	101.2	133	112	149.9	92.2	83.6	28.2	5	5	5	5	5	5	2	High	High	High	High	High	High	High
FALSE	High	Master Protein	P23142	Fibulin-1 OS=Homo sapiens OX=9606 GN=FBLN1 PE=1 SV=4	0	46.024	18	8	14	1	1	703	77.2	5.22	54.81	8	0.979	0.972	0.821	0.948	0.778	0.01	127.3	124.6	123.7	104.5	120.7	99.1		1	1	1	1	1	1		High	High	High	High	High	High	Not Found
FALSE	High	Master Protein	P01008	Antithrombin-III OS=Homo sapiens OX=9606 GN=SERPINC1 PE=1 SV=1	0	45.682	29	11	16	11	1	464	52.6	6.71	55.79	11	0.967	0.887	1.348	0.936	0.796	1.247	97.5	94.2	86.5	131.4	91.2	77.6	121.6	11	11	11	11	11	11	5	High	High	High	High	High	High	High
FALSE	High	Master Protein	A0A0C4DH67	Immunoglobulin kappa variable 1-8 OS=Homo sapiens OX=9606 GN=IGKV1-8 PE=3 SV=1	0	45.262	43	3	67	2	1	115	12.5	9.01	193.74	3	0.925	1.087	0.845	1.266	1.109	1.047	96.2	89	104.6	81.3	121.8	106.6	100.7	3	3	3	3	3	3	2	High	High	High	High	High	High	High
FALSE	High	Master Protein	A0A087WT59	Transthyretin OS=Homo sapiens OX=9606 GN=TTR PE=1 SV=1	0	44.887	42	7	17	7	1	185	20.1	5.33	54.82	7	0.871	0.727	1.512	0.928	0.766	0.65	108.5	94.5	78.8	163.9	100.6	83.1	70.5	6	6	6	6	6	6	2	High	High	High	High	High	High	High
FALSE	High	Master Protein	P12111	Collagen alpha-3(VI) chain OS=Homo sapiens OX=9606 GN=COL6A3 PE=1 SV=5	0	44.81	6	17	19	17	1	3177	343.5	6.68	53.06	17	1.1	1.194	0.959	1.055	0.835	0.656	103	113.2	122.9	98.8	108.6	86	67.5	16	16	16	16	16	16	6	High	High	High	High	High	High	High
FALSE	High	Master Protein	P06312	Immunoglobulin kappa variable 4-1 OS=Homo sapiens OX=9606 GN=IGKV4-1 PE=1 SV=1	0	44.72	35	4	84	4	1	121	13.4	5.25	248.91	4	0.969	0.996	0.916	1.25	0.981	0.842	100.7	97.6	100.2	92.2	125.8	98.8	84.7	7	7	7	7	7	7	7	High	High	High	High	High	High	High
FALSE	High	Master Protein	B4E1Z4	cDNA FLJ55673, highly similar to Complement factor B OS=Homo sapiens OX=9606 PE=1 SV=1	0	44.679	12	13	21	13	1	1266	140.9	7.18	66.62	13	1.145	1.075	1.221	1.003	0.616	0.387	108.6	124.3	116.8	132.6	108.9	66.9	42	13	13	13	13	13	13	4	High	High	High	High	High	High	High
FALSE	High	Master Protein	P01011	Alpha-1-antichymotrypsin OS=Homo sapiens OX=9606 GN=SERPINA3 PE=1 SV=2	0	44.621	23	9	17	9	1	423	47.6	5.52	58.03	9	0.869	0.82	0.884	0.638	0.634	0.468	131.8	114.5	108.1	116.4	84.1	83.5	61.6	8	8	8	8	8	8	4	High	High	High	High	High	High	High
FALSE	High	Master Protein	P07437	Tubulin beta chain OS=Homo sapiens OX=9606 GN=TUBB PE=1 SV=2	0	44.425	42	13	18	11	1	444	49.6	4.89	57.5	13	0.692	0.676	0.901	0.626	0.707	0.236	144.7	100.1	97.8	130.3	90.6	102.3	34.2	10	10	10	10	10	10	1	High	High	High	High	High	High	High
FALSE	High	Master Protein	P21333	Filamin-A OS=Homo sapiens OX=9606 GN=FLNA PE=1 SV=4	0	43.972	9	15	16	15	1	2647	280.6	6.06	51.76	15	0.879	0.976	0.959	1.08	1.252	0.742	101.6	89.3	99.2	97.4	109.8	127.2	75.4	14	14	14	14	14	14	4	High	High	High	High	High	High	High
FALSE	High	Master Protein	A0A0C4DH31	Immunoglobulin heavy variable 1-18 OS=Homo sapiens OX=9606 GN=IGHV1-18 PE=3 SV=1	0	43.885	64	5	34	3	1	117	12.8	8.84	98.85	5	0.92	0.947	0.821	1.011	0.94	0.132	121.3	111.6	114.9	99.6	122.6	114	16	5	5	5	5	5	5	1	High	High	High	High	High	High	High
FALSE	High	Master Protein	P04196	Histidine-rich glycoprotein OS=Homo sapiens OX=9606 GN=HRG PE=1 SV=1	0	43.872	25	11	16	11	1	525	59.5	7.5	52.84	11	0.923	0.811	0.953	0.886	0.666	0.391	124.3	114.8	100.8	118.5	110.2	82.8	48.6	11	11	11	11	11	11	4	High	High	High	High	High	High	High
FALSE	High	Master Protein	A0A2Q2TTZ9	Immunoglobulin kappa variable 1-33 OS=Homo sapiens OX=9606 GN=IGKV1D-33 PE=1 SV=1	0	43.463	54	3	48	3	1	108	11.8	5.34	207.23	3	0.886	0.914	0.806	1.044	1.064	0.557	111.6	98.9	102	90	116.6	118.8	62.1	4	4	4	4	4	4	3	High	High	High	High	High	High	High
FALSE	High	Master Protein	A0A0B4J1X5	Immunoglobulin heavy variable 3-74 OS=Homo sapiens OX=9606 GN=IGHV3-74 PE=3 SV=1	0	43.041	42	5	64	1	1	117	12.8	8.66	210.92	5	0.976	1.18	0.843	1.134	1.123	0.616	101.9	99.4	120.2	85.9	115.5	114.4	62.7	1	1	1	1	1	1	1	High	High	High	High	High	High	High
FALSE	High	Master Protein	P01762	Immunoglobulin heavy variable 3-11 OS=Homo sapiens OX=9606 GN=IGHV3-11 PE=1 SV=2	0	43.029	35	3	73	1	1	117	12.9	8.6	207.11	3	0.945	1.008	1.219	1.287	1.364	0.458	96.1	90.9	97	117.2	123.7	131.1	44	2	2	2	2	2	2	1	High	High	High	High	High	High	High
FALSE	High	Master Protein	P68366	Tubulin alpha-4A chain OS=Homo sapiens OX=9606 GN=TUBA4A PE=1 SV=1	0	42.966	25	9	16	2	1	448	49.9	5.06	50.98	9	0.506	0.504	0.729	0.297	0.426	0.38	182.2	92.2	91.9	132.8	54.1	77.6	69.2	2	2	2	2	2	2	1	High	High	High	High	High	High	High
FALSE	High	Master Protein	A0A0C4DH73	Immunoglobulin kappa variable 1-12 OS=Homo sapiens OX=9606 GN=IGKV1-12 PE=3 SV=1	0	41.947	29	2	99	1	1	117	12.6	8.31	290.1	2	0.781	0.948	0.803	1.062	1.429	1.2	96.9	75.7	91.9	77.8	102.9	138.5	116.3	2	2	2	2	2	2	2	High	High	High	High	High	High	High
FALSE	High	Master Protein	P00488	Coagulation factor XIII A chain OS=Homo sapiens OX=9606 GN=F13A1 PE=1 SV=4	0	41.845	23	13	17	13	1	732	83.2	6.09	53.17	13	0.835	1.168	0.965	1.19	0.909	0.978	99.4	83	116.1	95.9	118.3	90.3	97.2	13	13	13	13	13	13	6	High	High	High	High	High	High	High
FALSE	High	Master Protein	P02745	Complement C1q subcomponent subunit A OS=Homo sapiens OX=9606 GN=C1QA PE=1 SV=2	0	41.1	24	5	22	5	1	245	26	9.11	86.33	5	0.806	0.882	0.986	1.114	1.73	0.961	93.6	75.4	82.5	92.3	104.3	161.9	90	6	6	6	6	6	6	1	High	High	High	High	High	High	High
FALSE	High	Master Protein	Q9H4B7	Tubulin beta-1 chain OS=Homo sapiens OX=9606 GN=TUBB1 PE=1 SV=1	0	41.083	20	8	15	6	1	451	50.3	5.17	47.42	8	0.555	0.568	0.82	0.438	0.522	0.621	154.7	85.8	87.9	126.9	67.8	80.7	96	6	6	6	6	6	6	2	High	High	High	High	High	High	High
FALSE	High	Master Protein	P0DP08	Immunoglobulin heavy variable 4-38-2 OS=Homo sapiens OX=9606 GN=IGHV4-38-2 PE=3 SV=1	0	40.515	44	4	45	1	1	117	13	9.29	175.54	4	0.943	1.174	0.872	1.468	1.097	0.01	106.8	100.7	125.4	93.2	156.7	117.2		2	2	2	2	2	2		High	High	High	High	High	High	Not Found
FALSE	High	Master Protein	Q9Y490	Talin-1 OS=Homo sapiens OX=9606 GN=TLN1 PE=1 SV=3	0	40.51	7	12	15	12	1	2541	269.6	6.07	45.5	12	0.954	0.91	0.916	0.831	1.058	1.212	101.7	97	92.6	93.2	84.5	107.7	123.3	10	10	10	10	10	10	4	High	High	High	High	High	High	High
FALSE	High	Master Protein	Q8WWZ8	Oncoprotein-induced transcript 3 protein OS=Homo sapiens OX=9606 GN=OIT3 PE=1 SV=2	0	40.284	21	12	16	12	1	545	60	5.58	51.27	12	2.232	1.049	1.064	0.958	1.095	0.672	86.7	193.6	91	92.3	83.1	95	58.3	12	12	12	12	12	12	4	High	High	High	High	High	High	High
FALSE	High	Master Protein	A0A0J9YVY3	Immunoglobulin heavy variable 7-4-1 OS=Homo sapiens OX=9606 GN=IGHV7-4-1 PE=3 SV=1	0	40.123	40	3	65	1	1	117	12.8	8.63	197.13	3	0.754	0.867	0.76	0.903	0.96	0.01	133.5	100.6	115.7	101.5	120.5	128.2		1	1	1	1	1	1		High	High	High	High	High	High	Not Found
FALSE	High	Master Protein	Q14766	Latent-transforming growth factor beta-binding protein 1 OS=Homo sapiens OX=9606 GN=LTBP1 PE=1 SV=4	0	39.785	10	13	18	13	1	1721	186.7	5.96	48.59	13	1.27	1.201	0.871	1.118	0.756	0.567	103.2	131	124	89.8	115.4	78	58.5	12	12	12	12	12	12	2	High	High	High	High	High	High	High
FALSE	High	Master Protein	A0A0C4DH29	Immunoglobulin heavy variable 1-3 OS=Homo sapiens OX=9606 GN=IGHV1-3 PE=3 SV=1	0	39.349	54	5	36	3	1	117	13	9.55	100.53	5	1.214	1.04	0.975	1.069	0.962	1.404	91.3	110.9	95	89	97.7	87.8	128.2	4	4	4	4	4	4	2	High	High	High	High	High	High	High
FALSE	High	Master Protein	P00734	Prothrombin OS=Homo sapiens OX=9606 GN=F2 PE=1 SV=2	0	39.164	24	10	11	10	1	622	70	5.9	48.33	10	0.956	0.745	1.047	0.857	0.688	0.659	117.6	112.5	87.7	123.2	100.8	80.9	77.5	9	9	9	9	9	9	4	High	High	High	High	High	High	High
FALSE	High	Master Protein	P04433	Immunoglobulin kappa variable 3-11 OS=Homo sapiens OX=9606 GN=IGKV3-11 PE=1 SV=1	0	39.049	58	4	30	3	1	115	12.6	4.96	103.71	4	1.038	1.197	0.878	1.113	1.048	1.041	95.7	99.3	114.5	84.1	106.5	100.3	99.6	5	5	5	5	5	5	4	High	High	High	High	High	High	High
FALSE	High	Master Protein	P27169	Serum paraoxonase/arylesterase 1 OS=Homo sapiens OX=9606 GN=PON1 PE=1 SV=3	0	38.517	27	8	16	8	1	355	39.7	5.22	53.93	8	0.866	0.852	0.943	0.794	0.718	0.545	122.4	106.1	104.3	115.5	97.1	87.9	66.7	8	8	8	8	8	8	3	High	High	High	High	High	High	High
FALSE	High	Master Protein	P01701	Immunoglobulin lambda variable 1-51 OS=Homo sapiens OX=9606 GN=IGLV1-51 PE=1 SV=2	0	37.902	38	3	28	3	1	117	12.2	7.03	98.55	3	0.784	0.662	0.669	0.853	0.847	0.657	127.9	100.3	84.7	85.6	109.1	108.3	84.1	6	6	6	6	6	6	2	High	High	High	High	High	High	High
FALSE	High	Master Protein	P01602	Immunoglobulin kappa variable 1-5 OS=Homo sapiens OX=9606 GN=IGKV1-5 PE=1 SV=2	0	37.88	27	3	32	3	1	117	12.8	8.28	132.99	3	0.895	0.807	0.834	1.236	1.43	2.049	84.9	75.9	68.4	70.8	104.9	121.3	173.8	4	4	4	4	4	4	4	High	High	High	High	High	High	High
FALSE	High	Master Protein	H0YAC1	Plasma kallikrein (Fragment) OS=Homo sapiens OX=9606 GN=KLKB1 PE=1 SV=1	0	37.402	19	10	14	10	1	686	76.8	8.06	46.28	10	0.803	0.723	1.148	0.989	0.714	0.444	120.2	96.6	86.9	138	118.9	85.9	53.4	9	9	9	9	9	9	3	High	High	High	High	High	High	High
FALSE	High	Master Protein	P63104	14-3-3 protein zeta/delta OS=Homo sapiens OX=9606 GN=YWHAZ PE=1 SV=1	0	37.103	32	7	14	4	1	245	27.7	4.79	50.25	7	0.896	0.752	0.917	0.924	1.269	1.521	96.2	86.2	72.3	88.2	88.9	122	146.3	4	4	4	4	4	4	3	High	High	High	High	High	High	High
FALSE	High	Master Protein	P55259	Pancreatic secretory granule membrane major glycoprotein GP2 OS=Homo sapiens OX=9606 GN=GP2 PE=2 SV=3	0	36.932	16	7	15	4	1	537	59.4	5.24	50.66	7	4.636	1.174	1.135	1.124	4.228	4.485	39.4	182.5	46.2	44.7	44.3	166.4	176.6	4	4	4	4	4	4	3	High	High	High	High	High	High	High
FALSE	High	Master Protein	P01019	Angiotensinogen OS=Homo sapiens OX=9606 GN=AGT PE=1 SV=1	0	36.872	16	7	20	7	1	485	53.1	6.32	65.95	7	1.066	1.03	1.177	1.205	1.087	0.571	98.1	104.6	101.1	115.5	118.2	106.6	56	7	7	7	7	7	7	3	High	High	High	High	High	High	High
FALSE	High	Master Protein	A0A0A0MS15	Immunoglobulin heavy variable 3-49 OS=Homo sapiens OX=9606 GN=IGHV3-49 PE=3 SV=1	0	36.412	53	5	18	4	1	119	13	8.62	62.08	5	0.767	0.756	0.678	0.951	1.017	2.969	86	65.9	65	58.3	81.8	87.5	255.4	3	3	3	3	3	3	2	High	High	High	High	High	High	High
FALSE	High	Master Protein	A0A0B4J1Y9	Immunoglobulin heavy variable 3-72 OS=Homo sapiens OX=9606 GN=IGHV3-72 PE=3 SV=1	0	36.402	55	6	19	3	1	119	13.2	7.85	74.6	6	0.94	1.037	0.851	1.105	1.12	1.013	99	93.1	102.7	84.3	109.5	110.9	100.3	4	4	4	4	4	4	3	High	High	High	High	High	High	High
FALSE	High	Master Protein	Q9Y315	Deoxyribose-phosphate aldolase OS=Homo sapiens OX=9606 GN=DERA PE=1 SV=2	0	36.221	43	10	10	10	1	318	35.2	8.94	37.87	10	1.535	1.023	0.872	0.906	0.897	0.308	107	164.3	109.5	93.3	97	96	32.9	10	10	10	10	10	10	2	High	High	High	High	High	High	High
FALSE	High	Master Protein	A0A0C4DH32	Immunoglobulin heavy variable 3-20 OS=Homo sapiens OX=9606 GN=IGHV3-20 PE=3 SV=2	0	35.187	54	4	20	3	1	117	12.7	7.87	62.88	4	0.96	1.126	0.975	0.961	0.987	0.01	116.5	111.8	131.1	113.6	111.9	115		4	4	4	4	4	4		High	High	High	High	High	High	Not Found
FALSE	High	Master Protein	C9JV77	Alpha-2-HS-glycoprotein OS=Homo sapiens OX=9606 GN=AHSG PE=1 SV=1	0	35.124	29	8	15	8	1	368	39.4	5.72	57.37	8	0.878	0.699	0.91	0.72	0.649	0.083	141.7	124.4	99.1	128.9	102.1	92	11.7	8	8	8	8	8	8	1	High	High	High	High	High	High	High
FALSE	High	Master Protein	A0A075B6Q5	Immunoglobulin heavy variable 3-64 OS=Homo sapiens OX=9606 GN=IGHV3-64 PE=3 SV=1	0	35.005	35	3	21	3	1	118	12.9	7.85	61	3	1.125	1.051	0.924	1.241	1.191	0.8	95.5	107.4	100.3	88.2	118.5	113.7	76.4	7	7	7	7	7	7	3	High	High	High	High	High	High	High
FALSE	High	Master Protein	P23083	Immunoglobulin heavy variable 1-2 OS=Homo sapiens OX=9606 GN=IGHV1-2 PE=1 SV=2	0	34.295	39	4	29	2	1	117	13.1	9.13	75.67	4	1.13	1.184	1.001	1.785	1.384	0.345	89.4	101	105.8	89.5	159.6	123.8	30.8	3	3	3	3	3	3	1	High	High	High	High	High	High	High
FALSE	High	Master Protein	P05160	Coagulation factor XIII B chain OS=Homo sapiens OX=9606 GN=F13B PE=1 SV=3	0	34.106	17	8	10	8	1	661	75.5	6.39	38.7	8	0.841	1.289	1.087	1.378	1.037	0.75	94.8	79.7	122.3	103.1	130.7	98.3	71.1	8	8	8	8	8	8	1	High	High	High	High	High	High	High
FALSE	High	Master Protein	O43895	Xaa-Pro aminopeptidase 2 OS=Homo sapiens OX=9606 GN=XPNPEP2 PE=1 SV=3	0	34.067	17	10	15	10	1	674	75.6	6.04	48.17	10	5.481	1.707	0.855	0.897	0.868	0.01	64.8	355	110.6	55.4	58.1	56.2		9	9	9	9	9	9		High	High	High	High	High	High	Not Found
FALSE	High	Master Protein	Q8NBJ4	Golgi membrane protein 1 OS=Homo sapiens OX=9606 GN=GOLM1 PE=1 SV=1	0	33.864	26	9	15	9	1	401	45.3	4.97	49.75	9	0.574	0.873	0.857	1.159	0.878	0.498	119.9	68.8	104.7	102.8	138.9	105.2	59.7	9	9	9	9	9	9	2	High	High	High	High	High	High	High
FALSE	High	Master Protein	P16284	Platelet endothelial cell adhesion molecule OS=Homo sapiens OX=9606 GN=PECAM1 PE=1 SV=2	0	33.781	18	9	9	9	1	738	82.5	6.99	32.03	9	0.753	0.682	0.754	0.71	0.668	0.429	140.1	105.5	95.6	105.7	99.5	93.6	60.1	8	8	8	8	8	8	2	High	High	High	High	High	High	High
FALSE	High	Master Protein	P35443	Thrombospondin-4 OS=Homo sapiens OX=9606 GN=THBS4 PE=1 SV=2	0	33.424	13	7	12	5	1	961	105.8	4.68	38.23	7	0.909	0.954	1.32	1.126	1.41	0.525	104.2	94.7	99.4	137.5	117.3	146.9	54.7	4	4	4	4	4	4		High	High	High	High	High	High	Not Found
FALSE	High	Master Protein	Q9BWP8	Collectin-11 OS=Homo sapiens OX=9606 GN=COLEC11 PE=1 SV=1	0	33.402	22	5	16	5	1	271	28.6	5.41	61.55	5	1.21	1.152	0.933	1.11	1.794	1.486	80.6	97.5	92.8	75.2	89.5	144.6	119.8	5	5	5	5	5	5	4	High	High	High	High	High	High	High
FALSE	High	Master Protein	Q9HC84	Mucin-5B OS=Homo sapiens OX=9606 GN=MUC5B PE=1 SV=3	0	33.379	4	10	13	9	1	5762	596	6.64	42.89	10	1.222	1.355	0.964	1.128	2.979	2.678	61.8	75.5	83.7	59.6	69.7	184.1	165.5	9	9	9	9	9	9	6	High	High	High	High	High	High	High
FALSE	High	Master Protein	P05556	Integrin beta-1 OS=Homo sapiens OX=9606 GN=ITGB1 PE=1 SV=2	0	32.884	11	9	14	9	1	798	88.4	5.39	41.55	9	0.968	0.759	0.763	0.686	0.758	0.884	120.3	116.5	91.3	91.8	82.5	91.2	106.4	9	9	9	9	9	9	6	High	High	High	High	High	High	High
FALSE	High	Master Protein	P01766	Immunoglobulin heavy variable 3-13 OS=Homo sapiens OX=9606 GN=IGHV3-13 PE=1 SV=2	0	32.796	35	3	20	2	1	116	12.5	7.08	62.72	3	1.15	1.097	1.128	1.92	1.263	0.54	86.5	99.4	94.8	97.5	166	109.2	46.6	2	2	2	2	2	2	1	High	High	High	High	High	High	High
FALSE	High	Master Protein	P16671	Platelet glycoprotein 4 OS=Homo sapiens OX=9606 GN=CD36 PE=1 SV=2	0	32.777	13	5	15	5	1	472	53	7.96	54.41	5	1.001	0.789	0.983	1.165	1.271	1.145	95.2	95.3	75.1	93.6	110.9	120.9	109	5	5	5	5	5	5	4	High	High	High	High	High	High	High
FALSE	High	Master Protein	G3V5Z7	Proteasome subunit alpha type OS=Homo sapiens OX=9606 GN=PSMA6 PE=1 SV=1	0	32.557	31	8	11	8	1	252	28.1	6.76	34.74	8	0.752	0.637	0.672	0.584	0.58	0.431	150.3	113.1	95.8	101.1	87.8	87.2	64.8	8	8	8	8	8	8	4	High	High	High	High	High	High	High
FALSE	High	Master Protein	P61224	Ras-related protein Rap-1b OS=Homo sapiens OX=9606 GN=RAP1B PE=1 SV=1	0	32.541	43	7	11	7	1	184	20.8	5.78	42.72	7	0.886	0.53	0.894	0.797	0.774	0.859	122	108	64.6	109	97.2	94.4	104.7	7	7	7	7	7	7	5	High	High	High	High	High	High	High
FALSE	High	Master Protein	A0A0B4J1X8	Immunoglobulin heavy variable 3-43 OS=Homo sapiens OX=9606 GN=IGHV3-43 PE=3 SV=1	0	32.26	37	3	28	2	1	118	13.1	5.41	86.63	3	0.562	0.559	0.445	0.645	0.533	0.28	174	97.8	97.3	77.4	112.1	92.7	48.6	2	2	2	2	2	2	1	High	High	High	High	High	High	High
FALSE	High	Master Protein	P05546	Heparin cofactor 2 OS=Homo sapiens OX=9606 GN=SERPIND1 PE=1 SV=3	0	32.212	21	10	11	10	1	499	57	6.9	36.48	10	0.772	0.808	1.02	0.901	0.707	0.381	125.2	96.7	101.1	127.7	112.9	88.6	47.8	10	10	10	10	10	10	3	High	High	High	High	High	High	High
FALSE	High	Master Protein	A0A075B6R2	Immunoglobulin heavy variable 4-4 OS=Homo sapiens OX=9606 GN=IGHV4-4 PE=3 SV=2	0	32.035	38	3	27	1	1	117	12.8	9.6	121.58	3	0.932	1.253	0.987	0.945	0.933	0.01	115.7	107.8	145	114.2	109.4	108		1	1	1	1	1	1		High	High	High	High	High	High	Not Found
FALSE	High	Master Protein	P30479	HLA class I histocompatibility antigen, B-41 alpha chain OS=Homo sapiens OX=9606 GN=HLA-B PE=1 SV=1	0	31.809	23	7	12	1	1	362	40.5	6.54	40.86	7	1.933	15.322	3.45	2.336	1.177	0.01	27.8	53.7	425.3	95.8	64.8	32.7		1	1	1	1	1	1		High	High	High	High	High	High	Not Found
FALSE	High	Master Protein	P27105	Erythrocyte band 7 integral membrane protein OS=Homo sapiens OX=9606 GN=STOM PE=1 SV=3	0	31.769	37	8	12	8	1	288	31.7	7.88	47.56	8	0.904	0.736	0.786	0.806	0.794	0.474	127.3	115.1	93.6	100	102.6	101.1	60.3	8	8	8	8	8	8	4	High	High	High	High	High	High	High
FALSE	High	Master Protein	P04899	Guanine nucleotide-binding protein G(i) subunit alpha-2 OS=Homo sapiens OX=9606 GN=GNAI2 PE=1 SV=3	0	31.638	24	7	10	4	1	355	40.4	5.54	34.7	7	1.01	0.831	0.986	0.999	0.92	0.01	121.8	123.1	101.2	120.1	121.7	112.1		4	4	4	4	4	4		High	High	High	High	High	High	Not Found
FALSE	High	Master Protein	P01742	Immunoglobulin heavy variable 1-69 OS=Homo sapiens OX=9606 GN=IGHV1-69 PE=1 SV=2	0	31.33	45	5	27	2	1	117	12.7	9.17	81.9	5	1.166	1.635	1.323	1.626	1.749	2.611	63	73.5	103	83.3	102.5	110.2	164.5	2	2	2	2	2	2	2	High	High	High	High	High	High	High
FALSE	High	Master Protein	A0A024R571	EH domain-containing protein 1 OS=Homo sapiens OX=9606 GN=EHD1 PE=1 SV=1	0	31.253	23	12	14	10	1	548	61.9	6.71	40.64	12	1.465	0.899	0.872	1.015	0.849	0.663	103.5	151.6	93	90.3	105	87.9	68.6	10	10	10	10	10	10	4	High	High	High	High	High	High	High
FALSE	High	Master Protein	P02776	Platelet factor 4 OS=Homo sapiens OX=9606 GN=PF4 PE=1 SV=2	0	30.355	44	5	13	2	1	101	10.8	8.62	46.57	5	1.072	0.84	0.693	0.73	0.638	0.646	124.6	133.6	104.7	86.4	91	79.4	80.4	2	2	2	2	2	2	1	High	High	High	High	High	High	High
FALSE	High	Master Protein	P01699	Immunoglobulin lambda variable 1-44 OS=Homo sapiens OX=9606 GN=IGLV1-44 PE=1 SV=2	0	30.167	38	2	15	1	1	117	12.2	5.17	51.54	2	0.815	0.877	0.753	0.922	0.97	0.01	131.2	106.9	115.1	98.7	120.9	127.3		2	2	2	2	2	2		High	High	High	High	High	High	Not Found
FALSE	High	Master Protein	P07355	Annexin A2 OS=Homo sapiens OX=9606 GN=ANXA2 PE=1 SV=2	0	30.09	26	8	9	8	1	339	38.6	7.75	30.08	8	1.123	0.938	1.138	1.108	1.404	1.215	88.3	99.1	82.9	100.5	97.9	124	107.3	8	8	8	8	8	8	4	High	High	High	High	High	High	High
FALSE	High	Master Protein	Q03591	Complement factor H-related protein 1 OS=Homo sapiens OX=9606 GN=CFHR1 PE=1 SV=2	0	29.788	25	8	13	3	1	330	37.6	7.39	41.93	8	1.777	1.794	1.428	1.45	1.75	1.27	66.9	118.8	120	95.5	97	117	84.9	3	3	3	3	3	3	2	High	High	High	High	High	High	High
FALSE	High	Master Protein	A0A2R8Y5S7	Radixin OS=Homo sapiens OX=9606 GN=RDX PE=1 SV=1	0	29.742	15	9	13	2	1	590	69.3	6.27	37.92	9	1.046	0.964	1.095	1.084	1.153	0.01	110.4	115.5	106.4	120.9	119.6	127.3		2	2	2	2	2	2		High	High	High	High	High	High	Not Found
FALSE	High	Master Protein	P01599	Immunoglobulin kappa variable 1-17 OS=Homo sapiens OX=9606 GN=IGKV1-17 PE=1 SV=2	0	29.533	23	2	33	2	1	117	12.8	8.68	106.81	2	0.919	0.903	0.741	0.898	0.656	0.305	129.1	118.7	116.6	95.6	115.9	84.7	39.4	3	3	3	3	3	3	3	High	High	High	High	High	High	High
FALSE	High	Master Protein	P07358	Complement component C8 beta chain OS=Homo sapiens OX=9606 GN=C8B PE=1 SV=3	0	29.444	17	9	11	9	1	591	67	8.13	36.29	9	0.961	0.941	0.987	0.872	0.851	0.779	109.5	105.3	103.1	108.1	95.5	93.2	85.3	9	9	9	9	9	9	4	High	High	High	High	High	High	High
FALSE	High	Master Protein	A0A0B4J2H0	Immunoglobulin heavy variable 1-69D OS=Homo sapiens OX=9606 GN=IGHV1-69D PE=1 SV=1	0	29.291	45	4	24	1	1	117	12.7	8.47	75.18	4	0.935	1.031	1.031	0.953	0.9	0.01	119.7	111.8	123.4	123.4	114	107.7		1	1	1	1	1	1		High	High	High	High	High	High	Not Found
FALSE	High	Master Protein	P0DP01	Immunoglobulin heavy variable 1-8 OS=Homo sapiens OX=9606 GN=IGHV1-8 PE=3 SV=1	0	29.256	28	3	33	1	1	117	13	9.17	84.39	3	0.747	0.891	0.754	1.108	0.867	0.409	121.2	90.6	108	91.4	134.2	105	49.6	1	1	1	1	1	1	1	High	High	High	High	High	High	High
FALSE	High	Master Protein	Q8IZ83	Aldehyde dehydrogenase family 16 member A1 OS=Homo sapiens OX=9606 GN=ALDH16A1 PE=1 SV=2	0	28.701	11	7	9	7	1	802	85.1	6.79	30.7	7	1.388	1.186	0.999	1.087	1.111	1.2	87.8	121.9	104.1	87.8	95.5	97.6	105.4	7	7	7	7	7	7	3	High	High	High	High	High	High	High
FALSE	High	Master Protein	A0A087WSY6	Immunoglobulin kappa variable 3D-15 OS=Homo sapiens OX=9606 GN=IGKV3D-15 PE=3 SV=6	0	28.482	32	3	20	2	1	115	12.5	5.19	62.59	3	0.898	0.891	0.807	0.978	1.001	1.211	103.2	92.7	91.9	83.2	100.9	103.2	124.9	3	3	3	3	3	3	3	High	High	High	High	High	High	High
FALSE	High	Master Protein	P10316	HLA class I histocompatibility antigen, A-69 alpha chain OS=Homo sapiens OX=9606 GN=HLA-A PE=1 SV=2	0	28.416	22	7	11	2	1	365	41	6.9	36.38	7	0.786	0.78	0.838	0.746	0.894	0.646	123	96.7	95.9	103	91.8	110	79.5	2	2	2	2	2	2	1	High	High	High	High	High	High	High
FALSE	High	Master Protein	Q9H223	EH domain-containing protein 4 OS=Homo sapiens OX=9606 GN=EHD4 PE=1 SV=1	0	28.038	18	8	10	6	1	541	61.1	6.76	21.49	8	1.876	1.082	0.797	1.119	0.908	0.01	103.2	193.7	111.7	82.3	115.5	93.7		4	4	4	4	4	4		High	High	High	High	High	High	Not Found
FALSE	High	Master Protein	P13746	HLA class I histocompatibility antigen, A-11 alpha chain OS=Homo sapiens OX=9606 GN=HLA-A PE=1 SV=1	0	27.961	22	7	9	2	1	365	40.9	6.15	33.79	7	1.249	0.901	0.806	0.838	0.877	0.877	106.9	133.6	96.3	86.1	89.6	93.7	93.8	2	2	2	2	2	2	1	High	High	High	High	High	High	High
FALSE	High	Master Protein	A0A087WSY4	Immunoglobulin heavy variable 4-30-2 OS=Homo sapiens OX=9606 GN=IGHV4-30-2 PE=3 SV=1	0	27.637	37	3	27	2	1	118	13	9.67	117.78	3	1.033	0.857	0.841	1.027	1.442	2.073	84.6	87.4	72.5	71.1	86.9	122	175.4	2	2	2	2	2	2	2	High	High	High	High	High	High	High
FALSE	High	Master Protein	A0A0C4DH33	Immunoglobulin heavy variable 1-24 OS=Homo sapiens OX=9606 GN=IGHV1-24 PE=3 SV=1	0	27.34	53	4	20	3	1	117	12.8	5.16	49.74	4	0.44	0.467	0.401	0.455	0.434	0.01	218.9	96.4	102.2	87.8	99.6	95.1		5	5	5	5	5	5		High	High	High	High	High	High	Not Found
FALSE	High	Master Protein	P01700	Immunoglobulin lambda variable 1-47 OS=Homo sapiens OX=9606 GN=IGLV1-47 PE=1 SV=2	0	27.308	50	3	16	2	1	117	12.3	5.91	58.54	3	2.107	1.191	1.085	1.39	1.491	1.668	70.5	148.5	83.9	76.5	98	105.1	117.6	4	4	4	4	4	4	1	High	High	High	High	High	High	High
FALSE	High	Master Protein	O00602	Ficolin-1 OS=Homo sapiens OX=9606 GN=FCN1 PE=1 SV=2	0	27.099	23	7	11	6	1	326	35.1	6.86	35.42	7	0.932	1.371	0.963	0.876	0.776	0.124	115.9	108	158.9	111.5	101.5	89.9	14.3	6	6	6	6	6	6	1	High	High	High	High	High	High	High
FALSE	High	Master Protein	Q92734	Protein TFG OS=Homo sapiens OX=9606 GN=TFG PE=1 SV=2	0	27.023	20	5	9	5	1	400	43.4	5.1	33.38	5	1.777	1.207	0.818	0.953	1.224	1.646	81.2	144.2	97.9	66.4	77.4	99.4	133.6	5	5	5	5	5	5	3	High	High	High	High	High	High	High
FALSE	High	Master Protein	Q7Z794	Keratin, type II cytoskeletal 1b OS=Homo sapiens OX=9606 GN=KRT77 PE=2 SV=3	0	26.97	7	5	16	1	1	578	61.9	5.99	58.7	5	0.575	0.538	0.632	0.647	0.415	0.01	183.9	105.8	98.9	116.1	118.9	76.3		1	1	1	1	1	1		High	High	High	High	High	High	Not Found
FALSE	High	Master Protein	A0A075B6K4	Immunoglobulin lambda variable 3-10 OS=Homo sapiens OX=9606 GN=IGLV3-10 PE=3 SV=2	0	26.652	35	4	18	3	1	115	12.4	4.83	64.34	4	0.829	1.037	0.709	0.893	0.743	0.826	116	96.1	120.2	82.2	103.5	86.2	95.8	4	4	4	4	4	4	4	High	High	High	High	High	High	High
FALSE	High	Master Protein	A0A075B7B8	Immunoglobulin heavy variable 3/OR16-12 (non-functional) (Fragment) OS=Homo sapiens OX=9606 GN=IGHV3OR16-12 PE=1 SV=1	0	26.273	19	2	28	1	1	117	12.9	6.51	97.95	2	1.232	1.249	0.917	1.111	1.023	1.079	92	113.3	114.9	84.3	102.2	94.1	99.2	2	2	2	2	2	2	2	High	High	High	High	High	High	High
FALSE	High	Master Protein	P16190	HLA class I histocompatibility antigen, A-33 alpha chain OS=Homo sapiens OX=9606 GN=HLA-A PE=1 SV=3	0	26.058	21	7	10	1	1	365	40.9	6.7	32.99	7	0.878	1.518	1.329	1.644	1.234	1.344	78.2	68.7	118.8	103.9	128.6	96.6	105.2	1	1	1	1	1	1	1	High	High	High	High	High	High	High
FALSE	High	Master Protein	A0A2R8Y7X9	Uncharacterized protein OS=Homo sapiens OX=9606 PE=3 SV=1	0	25.814	30	4	34	3	1	168	18.4	6.96	89.63	4	1.281	1.208	1.263	1.713	2.272	1.421	68.9	88.3	83.2	87.1	118.1	156.6	97.9	3	3	3	3	3	3	1	High	High	High	High	High	High	High
FALSE	High	Master Protein	B0YIW2	Apolipoprotein C-III variant 1 OS=Homo sapiens OX=9606 GN=APOC3 PE=1 SV=1	0	25.601	29	3	7	3	1	117	12.8	8.18	31.73	3	1.124	0.985	1.226	1.132	1.013	0.921	94.6	106.3	93.2	116	107	95.8	87.1	3	3	3	3	3	3	2	High	High	High	High	High	High	High
FALSE	High	Master Protein	P22792	Carboxypeptidase N subunit 2 OS=Homo sapiens OX=9606 GN=CPN2 PE=1 SV=3	0	25.585	16	6	8	6	1	545	60.5	5.99	32.31	6	1.198	2.524	1.384	1.161	0.962	0.405	81.1	97.2	204.6	112.2	94.1	78	32.9	6	6	6	6	6	6	1	High	High	High	High	High	High	High
FALSE	High	Master Protein	A0A087X0Q4	Immunoglobulin kappa variable 2-40 OS=Homo sapiens OX=9606 GN=IGKV2-40 PE=1 SV=1	0	25.49	50	3	22	2	1	104	11.4	4.49	87.03	3	0.892	1.555	1.115	1.112	1.024	0.01	104.5	93.3	162.6	116.5	116.2	107		2	2	2	2	2	2		High	High	High	High	High	High	Not Found
FALSE	High	Master Protein	O00187	Mannan-binding lectin serine protease 2 OS=Homo sapiens OX=9606 GN=MASP2 PE=1 SV=4	0	25.455	11	5	12	5	1	686	75.7	5.63	43.61	5	1.56	1.089	1.312	1.423	1.502	2.063	70.4	109.7	76.6	92.3	100.1	105.7	145.1	5	5	5	5	5	5	4	High	High	High	High	High	High	High
FALSE	High	Master Protein	P62979	Ubiquitin-40S ribosomal protein S27a OS=Homo sapiens OX=9606 GN=RPS27A PE=1 SV=2	0	25.287	31	5	18	5	1	156	18	9.64	49.95	5	1.209	1.043	0.778	0.996	0.791	0.558	109.8	132.8	114.6	85.4	109.3	86.8	61.3	5	5	5	5	5	5	3	High	High	High	High	High	High	High
FALSE	High	Master Protein	A0A075B6S2	Immunoglobulin kappa variable 2D-29 OS=Homo sapiens OX=9606 GN=IGKV2D-29 PE=3 SV=1	0	24.811	40	3	24	1	1	120	13.1	7.12	90.34	3	0.644	0.625	0.644	1.804	0.818	0.01	126.4	81.4	79.1	81.5	228.1	103.5		1	1	1	1	1	1		High	High	High	High	High	High	Not Found
FALSE	High	Master Protein	P01601	Immunoglobulin kappa variable 1D-16 OS=Homo sapiens OX=9606 GN=IGKV1D-16 PE=3 SV=2	0	24.623	29	2	12	2	1	117	12.7	7.74	48.5	2	0.923	0.873	0.907	1.186	1.185	0.784	102.1	94.2	89.1	92.6	121	121	80	3	3	3	3	3	3	2	High	High	High	High	High	High	High
FALSE	High	Master Protein	A2NJV5	Immunoglobulin kappa variable 2-29 OS=Homo sapiens OX=9606 GN=IGKV2-29 PE=3 SV=2	0	24.271	40	3	23	1	1	120	13.1	7.28	88.4	3	1.103	0.881	0.326	1.29	1.539	2.957	77	84.9	67.8	25.1	99.3	118.4	227.6	1	1	1	1	1	1	1	High	High	High	High	High	High	High
FALSE	High	Master Protein	P02743	Serum amyloid P-component OS=Homo sapiens OX=9606 GN=APCS PE=1 SV=2	0	24.163	24	5	10	5	1	223	25.4	6.54	33.22	5	1.175	1.308	1.424	1.474	1.823	1.528	71.9	84.5	94.1	102.4	106	131.1	109.9	5	5	5	5	5	5	3	High	High	High	High	High	High	High
FALSE	High	Master Protein	P04040	Catalase OS=Homo sapiens OX=9606 GN=CAT PE=1 SV=3	0	24.093	17	6	9	6	1	527	59.7	7.39	31.01	6	0.974	1.06	0.898	0.905	1.153	0.385	109.8	106.9	116.4	98.6	99.4	126.6	42.3	6	6	6	6	6	6	1	High	High	High	High	High	High	High
FALSE	High	Master Protein	A0A075B6H7	Immunoglobulin kappa variable 3-7 (non-functional) (Fragment) OS=Homo sapiens OX=9606 GN=IGKV3-7 PE=1 SV=1	0	24.02	42	3	21	2	1	116	12.8	5.25	61.33	3	1.041	1.578	0.84	1.111	1.209	0.951	90.6	94.2	142.9	76.1	100.6	109.5	86.1	3	3	3	3	3	3	1	High	High	High	High	High	High	High
FALSE	High	Master Protein	Q95365	HLA class I histocompatibility antigen, B-38 alpha chain OS=Homo sapiens OX=9606 GN=HLA-B PE=1 SV=1	0	23.97	18	5	10	1	1	362	40.4	6.3	34.71	5	0.592	0.784	1.279	1.035	1.067	0.01	121.6	72	95.4	155.5	125.8	129.7		1	1	1	1	1	1		High	High	High	High	High	High	Not Found
FALSE	High	Master Protein	A0A087WVQ6	Clathrin heavy chain OS=Homo sapiens OX=9606 GN=CLTC PE=1 SV=1	0	23.812	5	7	9	7	1	1679	191.9	5.69	25.97	7	0.744	0.7	0.581	0.622	0.739	0.44	145	108	101.6	84.3	90.2	107.1	63.8	7	7	7	7	7	7	1	High	High	High	High	High	High	High
FALSE	High	Master Protein	P09172	Dopamine beta-hydroxylase OS=Homo sapiens OX=9606 GN=DBH PE=1 SV=3	0	23.733	13	6	7	6	1	617	69	6.42	21.81	6	0.768	0.955	0.94	1.635	0.908	0.749	100.7	77.3	96.2	94.6	164.5	91.3	75.4	6	6	6	6	6	6	3	High	High	High	High	High	High	High
FALSE	High	Master Protein	P00748	Coagulation factor XII OS=Homo sapiens OX=9606 GN=F12 PE=1 SV=3	0	23.683	18	10	10	10	1	615	67.7	7.74	33.22	10	0.364	0.303	0.304	0.245	0.248	0.276	255.5	93	77.4	77.6	62.6	63.4	70.6	9	9	9	9	9	9	4	High	High	High	High	High	High	High
FALSE	High	Master Protein	P27701	CD82 antigen OS=Homo sapiens OX=9606 GN=CD82 PE=1 SV=1	0	23.55	28	6	10	6	1	267	29.6	5.24	27.42	6	1.002	0.882	0.926	1.076	1.066	0.445	109.4	109.7	96.6	101.3	117.7	116.6	48.7	6	6	6	6	6	6	2	High	High	High	High	High	High	High
FALSE	High	Master Protein	Q15848	Adiponectin OS=Homo sapiens OX=9606 GN=ADIPOQ PE=1 SV=1	0	23.139	32	5	11	5	1	244	26.4	5.74	34.9	5	3.272	1.233	0.99	1.103	2.805	2.711	53.4	174.7	65.8	52.8	58.9	149.7	144.7	5	5	5	5	5	5	3	High	High	High	High	High	High	High
FALSE	High	Master Protein	A8K7I4	Calcium-activated chloride channel regulator 1 OS=Homo sapiens OX=9606 GN=CLCA1 PE=1 SV=3	0	23.128	10	6	8	6	1	914	100.2	6.37	27.61	6	0.837	0.829	0.717	1.467	1.399	2.159	83.3	69.7	69	59.7	122.1	116.5	179.8	5	5	5	5	5	5	4	High	High	High	High	High	High	High
FALSE	High	Master Protein	A0A075B6J9	Immunoglobulin lambda variable 2-18 OS=Homo sapiens OX=9606 GN=IGLV2-18 PE=3 SV=2	0	23.01	25	2	12	2	1	118	12.4	4.82	45.17	2	0.966	1.119	1.105	1.489	1.35	2.117	76.5	73.9	85.7	84.6	114	103.3	162	3	3	3	3	3	3	2	High	High	High	High	High	High	High
FALSE	High	Master Protein	P01703	Immunoglobulin lambda variable 1-40 OS=Homo sapiens OX=9606 GN=IGLV1-40 PE=1 SV=2	0	22.915	39	2	13	2	1	118	12.3	5.74	29.84	2	0.881	0.884	0.737	0.978	0.931	0.228	124.1	109.3	109.8	91.4	121.4	115.6	28.4	5	5	5	5	5	5	1	High	High	High	High	High	High	High
FALSE	High	Master Protein	P09871	Complement C1s subcomponent OS=Homo sapiens OX=9606 GN=C1S PE=1 SV=1	0	22.881	13	6	8	5	1	688	76.6	4.96	26.62	6	1.02	0.988	1.063	0.992	1.049	1.035	97.9	99.9	96.7	104.1	97.2	102.8	101.4	4	4	4	4	4	4	2	High	High	High	High	High	High	High
FALSE	High	Master Protein	A0A0B4J1U7	Immunoglobulin heavy variable 6-1 OS=Homo sapiens OX=9606 GN=IGHV6-1 PE=3 SV=1	0	22.546	40	4	17	4	1	121	13.5	9.2	57.5	4	1.228	1.223	0.966	1.294	1.176	1.031	88.4	108.6	108.1	85.4	114.4	103.9	91.1	4	4	4	4	4	4	3	High	High	High	High	High	High	High
FALSE	High	Master Protein	P25788	Proteasome subunit alpha type-3 OS=Homo sapiens OX=9606 GN=PSMA3 PE=1 SV=2	0	22.488	24	6	8	6	1	255	28.4	5.33	27.85	6	0.755	0.668	0.645	0.552	0.466	0.278	160.4	121.1	107.1	103.4	88.6	74.7	44.6	6	6	6	6	6	5	1	High	High	High	High	High	High	High
FALSE	High	Master Protein	O14672	Disintegrin and metalloproteinase domain-containing protein 10 OS=Homo sapiens OX=9606 GN=ADAM10 PE=1 SV=1	0	22.451	14	7	8	7	1	748	84.1	7.77	27.06	7	0.75	0.683	0.746	0.718	0.756	0.94	125.2	93.9	85.5	93.3	89.8	94.6	117.7	7	7	7	7	7	7	2	High	High	High	High	High	High	High
FALSE	High	Master Protein	A0A075B6K5	Immunoglobulin lambda variable 3-9 OS=Homo sapiens OX=9606 GN=IGLV3-9 PE=3 SV=1	0	22.282	50	4	11	4	1	115	12.3	7.39	43.14	4	1.003	1.019	0.82	1.014	1.061	0.164	115.1	115.4	117.3	94.4	116.8	122.1	18.9	4	4	4	4	4	4	1	High	High	High	High	High	High	High
FALSE	High	Master Protein	P04217	Alpha-1B-glycoprotein OS=Homo sapiens OX=9606 GN=A1BG PE=1 SV=4	0	22.131	20	7	7	7	1	495	54.2	5.86	27.38	7	1.043	0.931	1.297	0.917	0.796	0.446	108.9	113.5	101.4	141.2	99.9	86.6	48.6	7	7	7	7	7	7	1	High	High	High	High	High	High	High
FALSE	High	Master Protein	Q09327	Beta-1,4-mannosyl-glycoprotein 4-beta-N-acetylglucosaminyltransferase OS=Homo sapiens OX=9606 GN=MGAT3 PE=2 SV=3	0	22.11	13	5	7	5	1	533	61.3	8.28	25.13	5	0.643	0.806	0.686	1.328	1.116	1.125	104.4	67.2	84.1	71.6	138.6	116.5	117.5	5	5	5	5	5	5	3	High	High	High	High	High	High	High
FALSE	High	Master Protein	P98088	Mucin-5AC OS=Homo sapiens OX=9606 GN=MUC5AC PE=1 SV=4	0	22.052	3	8	9	7	1	5654	585.2	7.02	27.18	8	2.021	0.954	0.793	0.849	1.452	1.715	79.7	161.1	76	63.2	67.6	115.7	136.7	7	7	7	7	7	7	3	High	High	High	High	High	High	High
FALSE	High	Master Protein	P01706	Immunoglobulin lambda variable 2-11 OS=Homo sapiens OX=9606 GN=IGLV2-11 PE=1 SV=2	0	21.857	44	3	20	2	1	119	12.6	7.24	59.03	3	1.247	0.96	1.005	0.915	0.807	0.697	105.6	131.6	101.4	106.1	96.6	85.2	73.6	5	5	5	5	5	5	3	High	High	High	High	High	High	High
FALSE	High	Master Protein	A0A0C4DH25	Immunoglobulin kappa variable 3D-20 OS=Homo sapiens OX=9606 GN=IGKV3D-20 PE=3 SV=1	0	21.798	28	3	27	1	1	116	12.5	4.59	121.4	3	0.779	0.853	0.627	0.899	0.813	1.109	115.2	89.7	98.2	72.2	103.5	93.6	127.7	1	1	1	1	1	1	1	High	High	High	High	High	High	High
FALSE	High	Master Protein	P05186	Alkaline phosphatase, tissue-nonspecific isozyme OS=Homo sapiens OX=9606 GN=ALPL PE=1 SV=4	0	21.186	11	6	9	6	1	524	57.3	6.67	22.64	6	4.081	1.619	0.925	0.892	0.967	1.136	65.9	269	106.7	61	58.8	63.7	74.9	6	6	6	6	6	6	2	High	High	High	High	High	High	High
FALSE	High	Master Protein	P25789	Proteasome subunit alpha type-4 OS=Homo sapiens OX=9606 GN=PSMA4 PE=1 SV=1	0	20.884	24	6	7	6	1	261	29.5	7.72	24.19	6	0.715	0.764	0.622	0.586	0.507	0.756	141.4	101.1	108	88	82.9	71.7	106.9	5	5	5	5	5	5	2	High	High	High	High	High	High	High
FALSE	High	Master Protein	Q14697	Neutral alpha-glucosidase AB OS=Homo sapiens OX=9606 GN=GANAB PE=1 SV=3	0	20.869	11	8	8	8	1	944	106.8	6.14	22.66	8	0.808	1.076	0.875	0.834	0.735	0.647	117.2	94.7	126.1	102.5	97.7	86.1	75.8	8	8	8	8	8	8	3	High	High	High	High	High	High	High
FALSE	High	Master Protein	P25786	Proteasome subunit alpha type-1 OS=Homo sapiens OX=9606 GN=PSMA1 PE=1 SV=1	0	20.71	37	8	11	8	1	263	29.5	6.61	28.15	8	0.635	0.518	0.506	0.413	0.385	0.276	187.5	119.2	97.1	95	77.4	72.1	51.7	8	8	8	8	8	8	2	High	High	High	High	High	High	High
FALSE	High	Master Protein	E7ETH0	Complement factor I OS=Homo sapiens OX=9606 GN=CFI PE=1 SV=1	0	20.642	13	5	5	5	1	591	66.6	7.59	20.7	5	1.207	1.378	1.277	1.056	1.999	3.348	62.1	75	85.6	79.3	65.6	124.2	208	5	5	5	5	5	5	4	High	High	High	High	High	High	High
FALSE	High	Master Protein	P07360	Complement component C8 gamma chain OS=Homo sapiens OX=9606 GN=C8G PE=1 SV=3	0	20.514	36	5	5	5	1	202	22.3	8.31	22.45	5	0.999	1.146	1.093	1.004	0.877	0.583	104.5	104.4	119.7	114.1	104.9	91.6	60.9	5	5	5	5	5	5	1	High	High	High	High	High	High	High
FALSE	High	Master Protein	I3L486	Pancreatic secretory granule membrane major glycoprotein GP2 (Fragment) OS=Homo sapiens OX=9606 GN=GP2 PE=1 SV=1	0	20.442	25	4	10	1	1	163	18	6.16	31.88	4	3.874	1.043	1.078	1.171	3.715	2.709	48	185.9	50	51.7	56.2	178.2	130	1	1	1	1	1	1	1	High	High	High	High	High	High	High
FALSE	High	Master Protein	Q6UX06	Olfactomedin-4 OS=Homo sapiens OX=9606 GN=OLFM4 PE=1 SV=1	0	20.319	11	5	8	5	1	510	57.2	5.69	26.07	5	1.039	1.311	0.844	1.404	1.201	2.114	78.5	81.6	103	66.3	110.3	94.3	166	5	5	5	5	5	5	4	High	High	High	High	High	High	High
FALSE	High	Master Protein	A0A0G2JIW1	Heat shock 70 kDa protein 1B OS=Homo sapiens OX=9606 GN=HSPA1B PE=1 SV=1	0	19.976	8	5	8	1	1	642	70.1	5.66	26.76	5	1.452	1.303	0.758	0.893	0.902	0.01	111	161.1	144.5	84.2	99.1	100		1	1	1	1	1	1		High	High	High	High	High	High	Not Found
FALSE	High	Master Protein	P14618	Pyruvate kinase PKM OS=Homo sapiens OX=9606 GN=PKM PE=1 SV=4	0	19.908	19	5	8	5	1	531	57.9	7.84	22.17	5	0.557	0.614	0.638	0.618	0.612	0.01	173.3	96.6	106.4	110.6	107.1	106		3	3	3	3	3	3		High	High	High	High	High	High	Not Found
FALSE	High	Master Protein	Q96CX2	BTB/POZ domain-containing protein KCTD12 OS=Homo sapiens OX=9606 GN=KCTD12 PE=1 SV=1	0	19.84	31	7	8	7	1	325	35.7	5.64	23.24	7	1.137	0.751	0.734	1.774	1.109	0.724	96.8	110.1	72.8	71.1	171.8	107.4	70.1	6	6	6	6	6	6	1	High	High	High	High	High	High	High
FALSE	High	Master Protein	A0A0B4J1V6	Immunoglobulin heavy variable 3-73 OS=Homo sapiens OX=9606 GN=IGHV3-73 PE=3 SV=1	0	19.813	40	4	12	2	1	119	12.8	9.17	35.34	4	1.06	1.029	0.899	1.083	1.248	1.243	92.6	98.1	95.2	83.2	100.2	115.6	115	2	2	2	2	2	2	1	High	High	High	High	High	High	High
FALSE	High	Master Protein	E9PK25	Cofilin-1 OS=Homo sapiens OX=9606 GN=CFL1 PE=1 SV=1	0	19.551	23	4	8	4	1	204	22.7	8.34	24.39	4	1.156	0.854	0.908	0.923	1.293	1.941	86.7	100.3	74	78.7	80	112.1	168.2	4	4	4	4	4	4	3	High	High	High	High	High	High	High
FALSE	High	Master Protein	A0A0J9YX35	Immunoglobulin heavy variable 3-64D OS=Homo sapiens OX=9606 GN=IGHV3-64D PE=3 SV=1	0	19.507	22	3	16	3	1	117	12.8	7.85	51.22	3	0.997	1.148	0.996	1.207	1.253	1.371	87.8	87.5	100.8	87.5	106	110	120.4	4	4	4	4	4	4	3	High	High	High	High	High	High	High
FALSE	High	Master Protein	E7EQR4	Ezrin OS=Homo sapiens OX=9606 GN=EZR PE=1 SV=3	0	19.437	10	7	11	2	1	586	69.3	6.16	27.28	7	1.28	0.941	1.031	1.216	1.13	0.01	106.1	135.8	99.9	109.4	129	119.9		2	2	2	2	2	2		High	High	High	High	High	High	Not Found
FALSE	High	Master Protein	P01714	Immunoglobulin lambda variable 3-19 OS=Homo sapiens OX=9606 GN=IGLV3-19 PE=1 SV=2	0	19.317	63	4	14	4	1	112	12	4.96	28.94	4	0.899	0.927	0.88	1.116	0.946	0.529	111.2	99.9	103.1	97.8	124.1	105.2	58.8	3	3	3	3	3	3	1	High	High	High	High	High	High	High
FALSE	High	Master Protein	P15924	Desmoplakin OS=Homo sapiens OX=9606 GN=DSP PE=1 SV=3	0	19.096	3	7	9	7	1	2871	331.6	6.81	22.55	7	0.872	0.878	0.967	0.887	1.425	1.071	98.6	85.9	86.6	95.4	87.5	140.5	105.6	6	6	6	6	6	6	3	High	High	High	High	High	High	High
FALSE	High	Master Protein	P02654	Apolipoprotein C-I OS=Homo sapiens OX=9606 GN=APOC1 PE=1 SV=1	0	19.085	33	4	14	4	1	83	9.3	8.47	45.22	4	1.193	1.147	0.963	0.854	0.651	0.373	113.2	135.1	129.9	109.1	96.7	73.8	42.2	4	4	4	4	4	4	2	High	High	High	High	High	High	High
FALSE	High	Master Protein	A0A0B4J2D9	Immunoglobulin kappa variable 1D-13 OS=Homo sapiens OX=9606 GN=IGKV1D-13 PE=3 SV=1	0	19.059	29	2	4	2	1	117	12.6	7.84	18.49	2	0.772	0.676	0.492	1.263	0.605	0.249	138.4	106.9	93.6	68.1	174.9	83.7	34.4	2	2	2	2	2	2	1	High	High	High	High	High	High	High
FALSE	High	Master Protein	Q86UX7	Fermitin family homolog 3 OS=Homo sapiens OX=9606 GN=FERMT3 PE=1 SV=1	0	18.959	7	4	7	4	1	667	75.9	6.98	22.04	4	0.813	0.642	0.804	0.87	0.728	0.01	144.1	117.2	92.5	115.9	125.4	104.9		4	4	4	4	4	4		High	High	High	High	High	High	Not Found
FALSE	High	Master Protein	V9GYM3	Apolipoprotein A-II OS=Homo sapiens OX=9606 GN=APOA2 PE=1 SV=1	0	18.942	14	3	14	3	1	133	14.9	8.27	46.84	3	0.759	0.931	1.307	1.061	0.689	0.411	113.7	86.3	105.8	148.6	120.6	78.3	46.7	3	3	3	3	3	3	2	High	High	High	High	High	High	High
FALSE	High	Master Protein	P01717	Immunoglobulin lambda variable 3-25 OS=Homo sapiens OX=9606 GN=IGLV3-25 PE=1 SV=2	0	18.924	37	3	11	1	1	112	12	4.5	45.09	3	0.656	0.485	0.683	0.598	0.771	0.01	166.9	109.5	80.9	114.1	99.9	128.7		1	1	1	1	1	1		High	High	High	High	High	High	Not Found
FALSE	High	Master Protein	P08134	Rho-related GTP-binding protein RhoC OS=Homo sapiens OX=9606 GN=RHOC PE=1 SV=1	0	18.803	26	4	6	4	1	193	22	6.58	22.23	4	1.139	0.88	0.871	1.12	0.869	0.535	109.1	124.3	96.1	95	122.2	94.8	58.4	4	4	4	4	4	4	1	High	High	High	High	High	High	High
FALSE	High	Master Protein	P62937	Peptidyl-prolyl cis-trans isomerase A OS=Homo sapiens OX=9606 GN=PPIA PE=1 SV=2	0	18.761	26	4	6	4	1	165	18	7.81	18.63	4	1.219	0.811	0.827	1.026	1.269	0.544	104.5	127.5	84.8	86.5	107.3	132.6	56.8	4	4	4	4	4	4	2	High	High	High	High	High	High	High
FALSE	High	Master Protein	Q8WUM4	Programmed cell death 6-interacting protein OS=Homo sapiens OX=9606 GN=PDCD6IP PE=1 SV=1	0	18.722	6	5	7	5	1	868	96	6.52	22.15	5	0.873	0.75	0.52	0.518	0.385	0.522	153.2	133.7	115	79.7	79.4	58.9	80	5	5	5	5	5	5		High	High	High	High	High	High	Not Found
FALSE	High	Master Protein	P11597	Cholesteryl ester transfer protein OS=Homo sapiens OX=9606 GN=CETP PE=1 SV=2	0	18.721	9	5	8	5	1	493	54.7	6.09	24.99	5	0.782	1.141	1.105	1.071	1.061	1.026	97.4	76.2	111.2	107.6	104.4	103.4	99.9	5	5	5	5	5	5	2	High	High	High	High	High	High	High
FALSE	High	Master Protein	A0A075B7E8	Immunoglobulin heavy variable 3/OR16-13 (non-functional) (Fragment) OS=Homo sapiens OX=9606 GN=IGHV3OR16-13 PE=1 SV=1	0	18.512	26	4	15	1	1	117	12.9	8.31	53.25	4	0.917	1.362	0.887	1.149	0.791	0.354	108.4	99.4	147.6	96.1	124.4	85.8	38.4	1	1	1	1	1	1	1	High	High	High	High	High	High	High
FALSE	High	Master Protein	P35579	Myosin-9 OS=Homo sapiens OX=9606 GN=MYH9 PE=1 SV=4	0	18.507	5	7	7	7	1	1960	226.4	5.6	13.17	7	0.972	0.982	1.042	0.988	1.005	0.01	116.9	113.6	114.8	121.8	115.4	117.4		5	5	5	5	5	5		High	High	High	High	High	High	Not Found
FALSE	High	Master Protein	P10643	Complement component C7 OS=Homo sapiens OX=9606 GN=C7 PE=1 SV=2	0	18.284	9	6	8	6	1	843	93.5	6.48	25.59	6	0.974	0.849	0.927	0.694	0.553	0.3	132.1	128.7	112.2	122.5	91.7	73.1	39.7	5	5	5	5	5	5	2	High	High	High	High	High	High	High
FALSE	High	Master Protein	P13671	Complement component C6 OS=Homo sapiens OX=9606 GN=C6 PE=1 SV=3	0	18.176	6	5	6	5	1	934	104.7	6.76	18.83	5	0.975	1.13	1.046	1.01	1.076	0.834	99	96.5	111.9	103.6	100	106.5	82.5	5	5	5	5	5	5	1	High	High	High	High	High	High	High
FALSE	High	Master Protein	A0A0C4DH35	Immunoglobulin heavy variable 3-35 (non-functional) (Fragment) OS=Homo sapiens OX=9606 GN=IGHV3-35 PE=1 SV=1	0	18.155	16	2	15	2	1	117	12.8	7.88	50.89	2	0.992	1.143	0.889	1.079	1.08	1.176	95.1	94.3	108.7	84.6	102.6	102.8	111.9	3	3	3	3	3	3	3	High	High	High	High	High	High	High
FALSE	High	Master Protein	K7ER74	APOC4-APOC2 readthrough (NMD candidate) OS=Homo sapiens OX=9606 GN=APOC4-APOC2 PE=1 SV=1	0	18.143	16	3	6	3	1	178	20	6.64	23.88	3	1.314	1.354	1.104	0.932	0.756	0.586	99.4	130.6	134.5	109.6	92.6	75.1	58.2	3	3	3	3	3	3	3	High	High	High	High	High	High	High
FALSE	High	Master Protein	E9PGN7	Plasma protease C1 inhibitor OS=Homo sapiens OX=9606 GN=SERPING1 PE=1 SV=1	0	17.949	13	6	7	6	1	543	59.5	6.76	24.59	6	0.92	0.906	1.102	0.725	0.789	1.076	107.4	98.8	97.4	118.3	77.9	84.7	115.5	6	6	6	6	6	5	2	High	High	High	High	High	High	High
FALSE	High	Master Protein	E9PR17	Uncharacterized protein OS=Homo sapiens OX=9606 PE=1 SV=1	0	17.939	23	3	6	3	1	130	14.5	7.77	22.69	3	1.522	1.126	0.934	1.259	1.299	0.921	86.8	132.1	97.8	81.1	109.4	112.8	80	3	3	3	3	3	3	1	High	High	High	High	High	High	High
FALSE	High	Master Protein	P28070	Proteasome subunit beta type-4 OS=Homo sapiens OX=9606 GN=PSMB4 PE=1 SV=4	0	17.927	19	4	6	4	1	264	29.2	5.97	20.57	4	0.657	0.595	0.576	0.508	0.528	0.398	164.3	107.9	97.7	94.6	83.4	86.7	65.4	5	5	5	5	4	4	1	High	High	High	High	High	High	High
FALSE	High	Master Protein	P10720	Platelet factor 4 variant OS=Homo sapiens OX=9606 GN=PF4V1 PE=1 SV=1	0	17.543	45	4	8	1	1	104	11.5	9.1	29.55	4	0.973	1.049	1.278	1.33	0.949	0.01	106.4	103.6	111.6	136	141.5	100.9		1	1	1	1	1	1		High	High	High	High	High	High	Not Found
FALSE	High	Master Protein	P04424	Argininosuccinate lyase OS=Homo sapiens OX=9606 GN=ASL PE=1 SV=4	0	17.526	15	6	6	6	1	464	51.6	6.48	19.4	6	1.012	0.766	0.733	0.647	1.354	1.166	104.8	106.1	80.3	76.9	67.8	142	122.2	6	6	6	6	6	6	3	High	High	High	High	High	High	High
FALSE	High	Master Protein	A0A075B6S6	Immunoglobulin kappa variable 2D-30 OS=Homo sapiens OX=9606 GN=IGKV2D-30 PE=3 SV=1	0	17.252	20	2	21	1	1	120	13.2	7.99	83.04	2	3.001	0.766	0.975	1.362	1.287	1.326	72	216.2	55.2	70.3	98.1	92.7	95.5	1	1	1	1	1	1	1	High	High	High	High	High	High	High
FALSE	High	Master Protein	P15814	Immunoglobulin lambda-like polypeptide 1 OS=Homo sapiens OX=9606 GN=IGLL1 PE=1 SV=1	0	17.15	23	3	8	2	1	213	22.9	10.07	22.04	3	1.046	1.172	1.01	1.146	1.091	1.091	92.6	96.9	108.6	93.5	106.2	101	101.1	3	3	3	3	3	3	2	High	High	High	High	High	High	High
FALSE	High	Master Protein	A0A096LPE2	SAA2-SAA4 readthrough OS=Homo sapiens OX=9606 GN=SAA2-SAA4 PE=4 SV=1	0	17.146	25	6	7	6	1	208	23.3	8.98	21.3	6	1.508	1.533	1.356	0.991	0.883	0.866	86	129.7	131.9	116.6	85.2	76	74.5	6	6	6	6	6	6	4	High	High	High	High	High	High	High
FALSE	High	Master Protein	O15400	Syntaxin-7 OS=Homo sapiens OX=9606 GN=STX7 PE=1 SV=4	0	17.143	29	5	6	5	1	261	29.8	5.55	19.9	5	1.18	1.078	0.808	1.122	1.034	0.439	105.1	124	113.3	84.9	117.9	108.7	46.1	4	4	4	4	4	4	1	High	High	High	High	High	High	High
FALSE	High	Master Protein	P02741	C-reactive protein OS=Homo sapiens OX=9606 GN=CRP PE=1 SV=1	0	17.045	24	5	6	5	1	224	25	5.63	16.87	5	1.26	1.344	0.98	3.094	1.024	0.63	75	94.5	100.8	73.5	232.1	76.8	47.2	5	5	5	5	5	5	1	High	High	High	High	High	High	High
FALSE	High	Master Protein	A0A087WSX0	Immunoglobulin lambda variable 5-45 OS=Homo sapiens OX=9606 GN=IGLV5-45 PE=3 SV=1	0	16.949	21	2	8	2	1	123	13.2	7.2	23.43	2	1.011	1.079	1.006	1.408	0.899	1.421	89.5	90.5	96.5	90	125.9	80.5	127.1	3	3	3	3	3	3	2	High	High	High	High	High	High	High
FALSE	High	Master Protein	E7EQ64	Trypsin-1 OS=Homo sapiens OX=9606 GN=PRSS1 PE=1 SV=1	0	16.926	11	2	8	1	1	261	28.1	7.25	22.48	2	1.072	0.866	0.884	0.787	0.777	0.645	116.1	124.4	100.5	102.6	91.3	90.2	74.8	1	1	1	1	1	1	1	High	High	High	High	High	High	High
FALSE	High	Master Protein	P11166	Solute carrier family 2, facilitated glucose transporter member 1 OS=Homo sapiens OX=9606 GN=SLC2A1 PE=1 SV=2	0	16.9	7	4	8	4	1	492	54	8.72	25.86	4	1.177	0.765	0.697	0.999	0.985	0.81	108.8	128.1	83.2	75.9	108.7	107.2	88.2	4	4	4	4	4	4	2	High	High	High	High	High	High	High
FALSE	High	Master Protein	A0A0B4J1Y8	Immunoglobulin lambda variable 9-49 OS=Homo sapiens OX=9606 GN=IGLV9-49 PE=1 SV=1	0	16.714	30	4	10	3	1	123	13	7.28	35.9	4	1.976	1.071	0.839	1.297	2.858	4.212	52.8	104.3	56.6	44.3	68.5	151	222.5	3	3	3	3	3	3	3	High	High	High	High	High	High	High
FALSE	High	Master Protein	A0A075B7D0	Immunoglobulin heavy variable 1/OR15-1 (non-functional) (Fragment) OS=Homo sapiens OX=9606 GN=IGHV1OR15-1 PE=1 SV=1	0	16.545	40	4	19	3	1	117	13	9.13	42.27	4	0.968	0.994	0.785	1.208	1.417	2.543	78.5	76	78.1	61.6	94.9	111.3	199.6	3	3	3	3	3	3	2	High	High	High	High	High	High	High
FALSE	High	Master Protein	Q9UGM3	Deleted in malignant brain tumors 1 protein OS=Homo sapiens OX=9606 GN=DMBT1 PE=1 SV=2	0	16.497	15	4	4	4	1	2413	260.6	5.44	17.18	4	1.541	1.174	0.903	2.281	1.229	0.01	86.1	132.7	101.1	77.8	196.4	105.8		4	4	4	4	4	4		High	High	High	High	High	High	Not Found
FALSE	High	Master Protein	A0A0B4J1V0	Immunoglobulin heavy variable 3-15 OS=Homo sapiens OX=9606 GN=IGHV3-15 PE=3 SV=1	0	16.482	32	5	11	3	1	119	12.9	8.62	35.85	5	0.914	1.046	0.922	1.333	1.536	1.085	89.3	81.7	93.4	82.4	119.1	137.2	96.9	2	2	2	2	2	2	2	High	High	High	High	High	High	High
FALSE	High	Master Protein	P07357	Complement component C8 alpha chain OS=Homo sapiens OX=9606 GN=C8A PE=1 SV=2	0	16.463	13	4	5	4	1	584	65.1	6.47	19.32	4	0.984	0.884	1.022	1.093	0.794	0.406	113.2	111.4	100.1	115.7	123.7	89.9	46	3	3	3	3	3	3	1	High	High	High	High	High	High	High
FALSE	High	Master Protein	P63000	Ras-related C3 botulinum toxin substrate 1 OS=Homo sapiens OX=9606 GN=RAC1 PE=1 SV=1	0	16.458	21	4	5	3	1	192	21.4	8.5	18.05	4	1.267	0.84	0.819	0.835	0.869	1.569	97.2	123.2	81.7	79.6	81.2	84.5	152.6	3	3	3	3	3	3	2	High	High	High	High	High	High	High
FALSE	High	Master Protein	P12109	Collagen alpha-1(VI) chain OS=Homo sapiens OX=9606 GN=COL6A1 PE=1 SV=3	0	16.373	9	6	6	6	1	1028	108.5	5.43	19.68	6	1.112	1.163	1.211	1.073	0.828	0.434	102.6	114.1	119.3	124.3	110.1	85	44.5	6	6	6	6	6	6	1	High	High	High	High	High	High	High
FALSE	High	Master Protein	O43490	Prominin-1 OS=Homo sapiens OX=9606 GN=PROM1 PE=1 SV=1	0	16.305	9	5	6	5	1	865	97.1	7.27	22.79	5	0.513	0.781	0.484	0.506	0.525	0.26	172.1	88.3	134.4	83.2	87	90.3	44.7	5	5	5	5	5	5	1	High	High	High	High	High	High	High
FALSE	High	Master Protein	P62258	14-3-3 protein epsilon OS=Homo sapiens OX=9606 GN=YWHAE PE=1 SV=1	0	15.98	19	4	6	2	1	255	29.2	4.74	18.61	4	1.094	0.621	0.9	0.791	1.118	0.01	126.7	138.6	78.7	114	100.3	141.6		2	2	2	2	2	2		High	High	High	High	High	High	Not Found
FALSE	High	Master Protein	E7EMB3	Calmodulin-2 OS=Homo sapiens OX=9606 GN=CALM2 PE=1 SV=1	0	15.873	26	4	5	4	1	196	21.7	4.56	19.57	4	1.132	0.645	0.863	0.9	1.483	1.644	91.3	103.4	58.9	78.8	82.1	135.4	150.1	4	4	4	4	4	4	3	High	High	High	High	High	High	High
FALSE	High	Master Protein	Q9Y624	Junctional adhesion molecule A OS=Homo sapiens OX=9606 GN=F11R PE=1 SV=1	0	15.779	21	4	8	4	1	299	32.6	7.9	23.72	4	0.901	0.803	0.837	0.875	0.858	0.996	111.7	100.6	89.7	93.5	97.6	95.8	111.2	3	3	3	3	3	3	2	High	High	High	High	High	High	High
FALSE	High	Master Protein	P31946	14-3-3 protein beta/alpha OS=Homo sapiens OX=9606 GN=YWHAB PE=1 SV=3	0	15.604	17	4	6	1	1	246	28.1	4.83	18.74	4	1.014	1.159	0.92	0.963	0.915	0.01	117.2	118.9	135.8	107.8	112.9	107.3		1	1	1	1	1	1		High	High	High	High	High	High	Not Found
FALSE	High	Master Protein	P62873	Guanine nucleotide-binding protein G(I)/G(S)/G(T) subunit beta-1 OS=Homo sapiens OX=9606 GN=GNB1 PE=1 SV=3	0	15.394	15	4	5	4	1	340	37.4	6	19.34	4	1.161	1.151	0.853	0.924	0.882	0.932	101.4	117.7	116.7	86.5	93.7	89.4	94.5	4	4	4	4	4	4	2	High	High	High	High	High	High	High
FALSE	High	Master Protein	P25311	Zinc-alpha-2-glycoprotein OS=Homo sapiens OX=9606 GN=AZGP1 PE=1 SV=2	0	15.322	19	5	6	5	1	298	34.2	6.05	17.72	5	1.044	1.194	1.426	1.075	1.078	0.308	98.2	102.5	117.3	140.1	105.6	105.9	30.3	5	5	5	5	5	5	1	High	High	High	High	High	High	High
FALSE	High	Master Protein	Q8N699	Myc target protein 1 OS=Homo sapiens OX=9606 GN=MYCT1 PE=1 SV=1	0	15.269	17	3	4	3	1	235	26.6	9.83	15.16	3	0.992	1.05	0.921	1.116	0.945	0.563	106.3	105.4	111.5	97.9	118.6	100.4	59.9	3	3	3	3	3	3	1	High	High	High	High	High	High	High
FALSE	High	Master Protein	A0A0C4DFY5	G-protein-coupled receptor family C group 5 member C OS=Homo sapiens OX=9606 GN=GPRC5C PE=1 SV=1	0	14.851	9	4	5	4	1	486	52.9	8.94	19.42	4	3.402	0.83	0.816	0.717	0.68	0.01	94	319.9	78	76.7	67.4	63.9		4	4	4	4	4	4		High	High	High	High	High	High	Not Found
FALSE	High	Master Protein	A0A075B7D8	Immunoglobulin heavy variable 3/OR15-7 (pseudogene) (Fragment) OS=Homo sapiens OX=9606 GN=IGHV3OR15-7 PE=1 SV=1	0	14.814	29	3	7	2	1	119	13.1	8.28	23.83	3	0.947	1.482	0.686	0.945	1.047	1.332	94.1	89.1	139.4	64.6	88.9	98.5	125.3	1	1	1	1	1	1	1	High	High	High	High	High	High	High
FALSE	High	Master Protein	Q99436	Proteasome subunit beta type-7 OS=Homo sapiens OX=9606 GN=PSMB7 PE=1 SV=1	0	14.804	11	3	5	3	1	277	29.9	7.68	18.18	3	0.67	0.548	0.575	0.435	0.436	0.249	178.9	119.8	98	102.8	77.9	78.1	44.5	3	3	3	3	3	3	1	High	High	High	High	High	High	High
FALSE	High	Master Protein	O14818	Proteasome subunit alpha type-7 OS=Homo sapiens OX=9606 GN=PSMA7 PE=1 SV=1	0	14.784	26	5	6	5	1	248	27.9	8.46	19.17	5	0.743	0.535	0.52	0.4	0.356	0.143	189.3	140.6	101.4	98.5	75.7	67.4	27.1	4	4	4	4	4	4	1	High	High	High	High	High	High	High
FALSE	High	Master Protein	A0A0C4DH34	Immunoglobulin heavy variable 4-28 OS=Homo sapiens OX=9606 GN=IGHV4-28 PE=3 SV=1	0	14.62	21	2	17	2	1	117	13.1	9.29	50.29	2	0.906	0.95	0.726	1.019	0.912	0.641	113.7	103.1	108.1	82.6	115.9	103.8	72.9	3	3	3	3	3	3	2	High	High	High	High	High	High	High
FALSE	High	Master Protein	Q04917	14-3-3 protein eta OS=Homo sapiens OX=9606 GN=YWHAH PE=1 SV=4	0	14.558	13	3	5	1	1	246	28.2	4.84	15.18	3	0.699	1.245	1.12	0.996	1.054	0.01	114.5	80.1	142.6	128.2	114	120.7		1	1	1	1	1	1		High	High	High	High	High	High	Not Found
FALSE	High	Master Protein	P02794	Ferritin heavy chain OS=Homo sapiens OX=9606 GN=FTH1 PE=1 SV=2	0	14.539	15	2	5	2	1	183	21.2	5.55	15.29	2	1.011	1.164	0.848	0.743	1.153	1.009	101.1	102.1	117.7	85.7	75	116.5	101.9	3	3	3	3	3	3	1	High	High	High	High	High	High	High
FALSE	High	Master Protein	P12110	Collagen alpha-2(VI) chain OS=Homo sapiens OX=9606 GN=COL6A2 PE=1 SV=4	0	14.492	7	7	7	7	1	1019	108.5	6.21	17.03	7	1.116	1.619	1.082	1.066	0.907	1.075	89	99.3	144.1	96.3	94.9	80.7	95.7	7	7	7	7	7	7	3	High	High	High	High	High	High	High
FALSE	High	Master Protein	P01704	Immunoglobulin lambda variable 2-14 OS=Homo sapiens OX=9606 GN=IGLV2-14 PE=1 SV=2	0	14.352	13	1	18	1	1	120	12.6	6.49	53.93	1	2.021	1.04	1.161	1.35	1.212	0.856	81	163.7	84.3	94.1	109.4	98.2	69.4	3	3	3	3	3	3	2	High	High	High	High	High	High	High
FALSE	High	Master Protein	Q12805	EGF-containing fibulin-like extracellular matrix protein 1 OS=Homo sapiens OX=9606 GN=EFEMP1 PE=1 SV=2	0	14.346	13	5	5	5	1	493	54.6	5.07	13.82	5	0.988	1.17	0.929	0.893	0.906	0.319	112.8	111.5	131.9	104.8	100.7	102.2	36	5	5	5	5	5	5	1	High	High	High	High	High	High	High
FALSE	High	Master Protein	A6NMH8	Tetraspanin OS=Homo sapiens OX=9606 GN=CD81 PE=1 SV=1	0	14.237	13	2	4	2	1	274	29.8	6.92	18.72	2	0.967	0.764	0.709	0.889	0.694	0.01	139.3	134.8	106.4	98.8	123.9	96.7		2	2	2	2	2	2		High	High	High	High	High	High	Not Found
FALSE	High	Master Protein	A0A0J9YWU9	Uncharacterized protein (Fragment) OS=Homo sapiens OX=9606 PE=1 SV=1	0	14.06	25	3	21	1	1	116	12.9	9.06	70.97	3	0.976	1.196	1.08	1.229	1.027	0.01	107.5	105	128.7	116.2	132.2	110.4		1	1	1	1	1	1		High	High	High	High	High	High	Not Found
FALSE	High	Master Protein	P01709	Immunoglobulin lambda variable 2-8 OS=Homo sapiens OX=9606 GN=IGLV2-8 PE=1 SV=2	0	13.99	14	2	21	1	1	118	12.4	5.91	60.36	2	0.951	0.857	0.863	1.075	1.101	1.057	101.4	96.4	86.9	87.5	109	111.6	107.1	3	3	3	3	3	3	3	High	High	High	High	High	High	High
FALSE	High	Master Protein	Q8NG11	Tetraspanin-14 OS=Homo sapiens OX=9606 GN=TSPAN14 PE=1 SV=1	0	13.933	14	4	5	4	1	270	30.7	6.84	17.01	4	0.836	0.844	0.911	0.883	0.783	0.342	125	104.5	105.6	113.8	110.4	97.9	42.7	4	4	4	4	4	4	1	High	High	High	High	High	High	High
FALSE	High	Master Protein	A0A075B6I9	Immunoglobulin lambda variable 7-46 OS=Homo sapiens OX=9606 GN=IGLV7-46 PE=3 SV=4	0	13.922	15	2	12	1	1	117	12.5	7.2	35.84	2	0.984	0.905	1.022	1.466	1.222	1.591	85.5	84.1	77.4	87.4	125.3	104.4	136	2	2	2	2	2	2	1	High	High	High	High	High	High	High
FALSE	High	Master Protein	Q08431	Lactadherin OS=Homo sapiens OX=9606 GN=MFGE8 PE=1 SV=3	0	13.905	14	4	6	4	1	387	43.1	8.15	20.51	4	1.11	1.174	1.06	1.324	1.028	0.597	96	106.5	112.7	101.7	127.1	98.6	57.3	4	4	4	4	4	4	1	High	High	High	High	High	High	High
FALSE	High	Master Protein	P28066	Proteasome subunit alpha type-5 OS=Homo sapiens OX=9606 GN=PSMA5 PE=1 SV=3	0	13.864	12	3	6	3	1	241	26.4	4.79	13.06	3	0.65	0.702	0.635	0.556	0.565	0.01	170.4	110.8	119.6	108.1	94.8	96.3		2	2	2	2	2	2		High	High	High	High	High	High	Not Found
FALSE	High	Master Protein	P06702	Protein S100-A9 OS=Homo sapiens OX=9606 GN=S100A9 PE=1 SV=1	0	13.856	32	3	10	3	1	114	13.2	6.13	29.56	3	1.338	0.949	1.131	1.062	1.28	1.8	81.8	109.4	77.6	92.5	86.8	104.7	147.2	3	3	3	3	3	3	2	High	High	High	High	High	High	High
FALSE	High	Master Protein	A0A0C4DH55	Immunoglobulin kappa variable 3D-7 OS=Homo sapiens OX=9606 GN=IGKV3D-7 PE=3 SV=5	0	13.851	32	3	23	1	1	119	13.1	5.94	60.6	3	0.874	1.013	0.877	0.992	0.876	1.023	105.2	91.9	106.6	92.2	104.3	92.2	107.6	1	1	1	1	1	1	1	High	High	High	High	High	High	High
FALSE	High	Master Protein	A6XMV9	Protease serine 2 preproprotein OS=Homo sapiens OX=9606 GN=PRSS2 PE=1 SV=1	0	13.838	11	2	5	1	1	261	28	5.14	15.29	2	0.743	0.546	0.338	0.127	0.085	0.01	246.5	183.1	134.7	83.4	31.4	21		1	1	1	1	1	1		High	High	High	High	High	High	Not Found
FALSE	High	Master Protein	P24821	Tenascin OS=Homo sapiens OX=9606 GN=TNC PE=1 SV=3	0	13.797	3	5	5	5	1	2201	240.7	4.89	16.58	5	1.811	1.189	1.104	1.245	1.518	1.337	76.1	137.7	90.4	83.9	94.7	115.4	101.7	4	4	4	4	4	4	1	High	High	High	High	High	High	High
FALSE	High	Master Protein	P60953	Cell division control protein 42 homolog OS=Homo sapiens OX=9606 GN=CDC42 PE=1 SV=2	0	13.725	11	2	4	1	1	191	21.2	6.55	13.64	2	1.655	1.074	1.035	1.135	1.231	1.861	77.8	128.9	83.6	80.6	88.3	95.9	144.9	1	1	1	1	1	1	1	High	High	High	High	High	High	High
FALSE	High	Master Protein	Q8NHM4	Putative trypsin-6 OS=Homo sapiens OX=9606 GN=PRSS3P2 PE=5 SV=2	0	13.57	11	2	5	1	1	247	26.5	6.01	14.2	2	1.082	1.009	0.741	0.863	0.895	1.023	105.8	114.6	106.8	78.4	91.4	94.7	108.3	1	1	1	1	1	1	1	High	High	High	High	High	High	High
FALSE	High	Master Protein	A0A140T9M0	HLA class I histocompatibility antigen, Cw-6 alpha chain OS=Homo sapiens OX=9606 GN=HLA-C PE=1 SV=1	0	13.526	9	3	4	1	1	372	41.5	6.47	15.38	3	1.206	1.069	1.011	1.293	1.557	0.01	98.1	118.3	104.9	99.2	126.8	152.7		1	1	1	1	1	1		High	High	High	High	High	High	Not Found
FALSE	High	Master Protein	Q95604	HLA class I histocompatibility antigen, Cw-17 alpha chain OS=Homo sapiens OX=9606 GN=HLA-C PE=1 SV=1	0	13.508	13	4	4	2	1	372	41.2	6.8	13.47	4	1.067	0.819	0.749	0.84	0.979	0.01	128.3	136.9	105.1	96.1	107.8	125.7		2	2	2	2	2	2		High	High	High	High	High	High	Not Found
FALSE	High	Master Protein	P02788	Lactotransferrin OS=Homo sapiens OX=9606 GN=LTF PE=1 SV=6	0	13.328	10	5	6	5	1	710	78.1	8.12	17.83	5	1.067	1.029	0.927	0.865	1.012	1.163	99.1	105.7	101.9	91.9	85.7	100.3	115.3	5	5	5	5	5	5	2	High	High	High	High	High	High	High
FALSE	High	Master Protein	P56199	Integrin alpha-1 OS=Homo sapiens OX=9606 GN=ITGA1 PE=1 SV=2	0	12.817	5	6	6	6	1	1179	130.8	6.29	16.48	6	1.704	1.189	0.872	0.884	0.813	0.53	100.1	170.6	119	87.3	88.5	81.4	53	6	6	6	6	6	6	2	High	High	High	High	High	High	High
FALSE	High	Master Protein	Q06033	Inter-alpha-trypsin inhibitor heavy chain H3 OS=Homo sapiens OX=9606 GN=ITIH3 PE=1 SV=2	0	12.783	6	4	5	4	1	890	99.8	5.74	18.12	4	1.244	1.086	0.815	0.891	0.918	0.999	100.7	125.2	109.3	82.1	89.7	92.4	100.6	4	4	4	4	4	4	2	High	High	High	High	High	High	High
FALSE	High	Master Protein	Q9ULI3	Protein HEG homolog 1 OS=Homo sapiens OX=9606 GN=HEG1 PE=1 SV=3	0	12.521	3	2	4	2	1	1381	147.4	6.18	14.86	2	0.778	0.808	1.092	1.368	1.126	1.929	86.4	67.2	69.8	94.4	118.2	97.3	166.7	2	2	2	2	2	2	1	High	High	High	High	High	High	High
FALSE	High	Master Protein	P01718	Immunoglobulin lambda variable 3-27 OS=Homo sapiens OX=9606 GN=IGLV3-27 PE=1 SV=2	0	12.473	24	2	9	1	1	113	12.2	5.01	39.48	2	1.171	0.713	0.751	2.254	0.839	0.512	96.7	113.2	68.9	72.6	218	81.1	49.5	1	1	1	1	1	1	1	High	High	High	High	High	High	High
FALSE	High	Master Protein	P29622	Kallistatin OS=Homo sapiens OX=9606 GN=SERPINA4 PE=1 SV=3	0	12.218	12	4	5	4	1	427	48.5	7.75	13.39	4	0.818	0.958	0.882	0.82	0.672	0.01	135.9	111.1	130.2	119.9	111.5	91.4		4	4	4	4	4	4		High	High	High	High	High	High	Not Found
FALSE	High	Master Protein	Q92187	CMP-N-acetylneuraminate-poly-alpha-2,8-sialyltransferase OS=Homo sapiens OX=9606 GN=ST8SIA4 PE=1 SV=1	0	12.132	12	4	4	4	1	359	41.3	9.74	12.44	4	0.915	1.166	1.046	1.377	1.363	1.975	79.2	72.4	92.3	82.8	109	107.9	156.4	4	4	4	4	4	4	3	High	High	High	High	High	High	High
FALSE	High	Master Protein	Q9C0H2	Protein tweety homolog 3 OS=Homo sapiens OX=9606 GN=TTYH3 PE=1 SV=3	0	12.107	7	4	6	4	1	523	57.5	5.39	19.23	4	1.083	1.218	0.981	1.012	0.869	0.668	102.5	111	124.8	100.5	103.7	89.1	68.5	4	4	4	4	4	4	1	High	High	High	High	High	High	High
FALSE	High	Master Protein	P08575	Receptor-type tyrosine-protein phosphatase C OS=Homo sapiens OX=9606 GN=PTPRC PE=1 SV=3	0	12.03	4	5	5	5	1	1306	147.4	6.15	12.83	5	1.15	1.079	1.1	1.212	1.16	0.727	94.2	108.4	101.7	103.7	114.2	109.3	68.6	5	5	5	5	5	5	1	High	High	High	High	High	High	High
FALSE	High	Master Protein	P30273	High affinity immunoglobulin epsilon receptor subunit gamma OS=Homo sapiens OX=9606 GN=FCER1G PE=1 SV=1	0	11.883	33	3	4	3	1	86	9.7	7.12	12.4	3	0.668	0.951	0.784	0.656	0.744	0.622	129	86.2	122.7	101.2	84.7	96	80.3	3	3	3	3	3	3	2	High	High	High	High	High	High	High
FALSE	High	Master Protein	Q01518	Adenylyl cyclase-associated protein 1 OS=Homo sapiens OX=9606 GN=CAP1 PE=1 SV=5	0	11.759	11	3	4	3	1	475	51.9	8.06	11.79	3	0.823	0.827	1.142	0.958	0.927	0.01	123.3	101.5	102	140.8	118.1	114.3		2	2	2	2	2	2		High	High	High	High	High	High	High
FALSE	High	Master Protein	P01817	Immunoglobulin heavy variable 2-5 OS=Homo sapiens OX=9606 GN=IGHV2-5 PE=1 SV=2	0	11.757	19	1	4	1	1	119	13.2	8.29	15.62	1	1.158	1.105	1.301	1.725	1.508	2.523	67.8	78.5	75	88.3	117	102.3	171.1	2	2	2	2	2	2	1	High	High	High	High	High	High	High
FALSE	High	Master Protein	A0A0C4DH36	Immunoglobulin heavy variable 3-38 (non-functional) (Fragment) OS=Homo sapiens OX=9606 GN=IGHV3-38 PE=1 SV=1	0	11.745	19	2	5	2	1	116	12.8	9.25	18.76	2	0.902	0.767	0.719	0.886	0.911	0.556	121.9	110	93.5	87.7	108	111.1	67.7	2	2	2	2	2	2	2	High	High	High	High	High	High	High
FALSE	High	Master Protein	P49721	Proteasome subunit beta type-2 OS=Homo sapiens OX=9606 GN=PSMB2 PE=1 SV=1	0	11.707	19	3	5	3	1	201	22.8	7.02	15.62	3	0.708	0.502	0.555	0.406	0.356	0.208	187.4	132.7	94.1	104	76.1	66.8	38.9	2	2	2	2	2	2	1	High	High	High	High	High	High	High
FALSE	High	Master Protein	A0A0A0MT36	Immunoglobulin kappa variable 6D-21 OS=Homo sapiens OX=9606 GN=IGKV6D-21 PE=3 SV=1	0	11.685	29	2	6	1	1	114	12.3	7.28	21.68	2	1.899	1.449	1.166	1.359	1.422	1.869	68.9	130.8	99.8	80.3	93.6	98	128.7	2	2	2	2	2	2	2	High	High	High	High	High	High	High
FALSE	High	Master Protein	A0A0C4DH39	Immunoglobulin heavy variable 1-58 OS=Homo sapiens OX=9606 GN=IGHV1-58 PE=3 SV=1	0	11.583	13	1	2	1	1	117	13	9.25	9.52	1	1.118	0.988	0.758	1.026	1.401	0.01	111.3	124.4	109.9	84.4	114.2	155.9		1	1	1	1	1	1		High	High	High	High	High	High	Not Found
FALSE	High	Master Protein	P62820	Ras-related protein Rab-1A OS=Homo sapiens OX=9606 GN=RAB1A PE=1 SV=3	0	11.503	20	3	3	2	1	205	22.7	6.21	9.63	3	1.166	0.709	0.736	0.975	0.886	1.067	107	124.8	75.8	78.8	104.4	94.9	114.2	2	2	2	2	2	2	1	High	High	High	High	High	High	High
FALSE	High	Master Protein	P04211	Immunoglobulin lambda variable 7-43 OS=Homo sapiens OX=9606 GN=IGLV7-43 PE=3 SV=2	0	11.264	15	2	10	1	1	117	12.4	7.03	30.78	2	1.088	1.181	1.025	1.055	0.984	0.65	100.2	109.1	118.4	102.8	105.8	98.7	65.1	1	1	1	1	1	1	1	High	High	High	High	High	High	High
FALSE	High	Master Protein	A0A075B6R9	Immunoglobulin kappa variable 2D-24 (non-functional) (Fragment) OS=Homo sapiens OX=9606 GN=IGKV2D-24 PE=4 SV=1	0	11.255	11	1	7	1	1	120	13.1	8.87	27.43	1	0.914	0.632	0.794	0.94	0.613	0.344	133.7	122.2	84.5	106.1	125.7	82	45.9	1	1	1	1	1	1	1	High	High	High	High	High	High	High
FALSE	High	Master Protein	Q9HBI1	Beta-parvin OS=Homo sapiens OX=9606 GN=PARVB PE=1 SV=1	0	11.252	9	3	4	3	1	364	41.7	6.73	11.27	3	0.765	0.633	0.765	0.807	0.753	0.878	125	95.6	79.1	95.6	100.9	94.1	109.7	3	3	3	3	3	3	2	High	High	High	High	High	High	High
FALSE	High	Master Protein	Q96PD5	N-acetylmuramoyl-L-alanine amidase OS=Homo sapiens OX=9606 GN=PGLYRP2 PE=1 SV=1	0	11.235	10	3	3	3	1	576	62.2	7.55	13.63	3	0.928	1.004	1.29	1.182	0.977	0.01	109.7	101.8	110.1	141.5	129.7	107.2		3	3	3	3	3	3		High	High	High	High	High	High	Not Found
FALSE	High	Master Protein	C9JF17	Apolipoprotein D (Fragment) OS=Homo sapiens OX=9606 GN=APOD PE=1 SV=1	0	11.171	13	3	3	3	1	215	24.1	5.6	10.9	3	0.988	1.181	1.303	0.966	0.888	0.01	110.7	109.3	130.7	144.2	106.9	98.3		3	3	3	3	3	3		High	High	High	High	High	High	Not Found
FALSE	High	Master Protein	Q01469	Fatty acid-binding protein 5 OS=Homo sapiens OX=9606 GN=FABP5 PE=1 SV=3	0	11.142	29	4	5	4	1	135	15.2	7.01	11.98	4	1.128	0.96	1.376	1.082	2.926	3.924	56.5	63.7	54.2	77.7	61.1	165.2	221.6	4	4	4	4	4	4	4	High	High	High	High	High	High	High
FALSE	High	Master Protein	Q14CZ8	Hepatocyte cell adhesion molecule OS=Homo sapiens OX=9606 GN=HEPACAM PE=1 SV=1	0	11.137	12	3	4	3	1	416	46	9.11	11.67	3	2.564	0.986	0.779	0.659	0.649	0.01	105.5	270.4	104	82.1	69.6	68.4		2	2	2	2	2	2		High	High	High	High	High	High	Not Found
FALSE	High	Master Protein	Q8WW52	Protein FAM151A OS=Homo sapiens OX=9606 GN=FAM151A PE=2 SV=2	0	11.091	4	3	5	3	1	585	64	6.67	14.52	3	2.878	1.187	0.919	1.214	0.987	0.29	82.6	237.7	98.1	75.9	100.3	81.6	23.9	3	3	3	3	3	3	1	High	High	High	High	High	High	High
FALSE	High	Master Protein	P84095	Rho-related GTP-binding protein RhoG OS=Homo sapiens OX=9606 GN=RHOG PE=1 SV=1	0	10.901	13	2	3	1	1	191	21.3	8.12	9.66	2	1.231	1.129	0.986	0.897	0.987	0.01	112.4	138.3	126.9	110.8	100.8	110.9		1	1	1	1	1	1		High	High	High	High	High	High	Not Found
FALSE	High	Master Protein	P00325	Alcohol dehydrogenase 1B OS=Homo sapiens OX=9606 GN=ADH1B PE=1 SV=2	0	10.692	11	4	5	4	1	375	39.8	8.29	15.89	4	1.47	0.928	0.746	0.832	0.818	0.268	115.5	169.7	107.2	86.1	96.1	94.5	31	4	4	4	4	4	4	1	High	High	High	High	High	High	High
FALSE	High	Master Protein	P49908	Selenoprotein P OS=Homo sapiens OX=9606 GN=SELENOP PE=1 SV=3	0	10.531	10	4	4	4	1	381	43.2	7.87	12.47	4	0.976	1.087	1.101	1.125	1.07	1.098	93.9	91.6	102	103.4	105.6	100.5	103.1	4	4	4	4	4	4	3	High	High	High	High	High	High	High
FALSE	High	Master Protein	P35555	Fibrillin-1 OS=Homo sapiens OX=9606 GN=FBN1 PE=1 SV=3	0	10.479	2	6	6	6	1	2871	312	4.93	11.1	6	1.185	1.216	1.383	1.437	1.328	1.896	74.1	87.8	90.1	102.5	106.5	98.4	140.5	5	5	5	5	5	5	3	High	High	High	High	High	High	High
FALSE	High	Master Protein	P14151	L-selectin OS=Homo sapiens OX=9606 GN=SELL PE=1 SV=2	0	10.476	7	2	3	2	1	372	42.2	6.6	11.03	2	0.905	0.941	1.096	1.101	1.17	0.957	97.6	88.3	91.9	107	107.5	114.2	93.4	2	2	2	2	2	2	1	High	High	High	High	High	High	High
FALSE	High	Master Protein	P80723	Brain acid soluble protein 1 OS=Homo sapiens OX=9606 GN=BASP1 PE=1 SV=2	0	10.471	21	3	3	3	1	227	22.7	4.63	11.6	3	1.012	0.842	0.928	1.007	1.149	0.01	117.9	119.3	99.3	109.4	118.7	135.5		3	3	3	3	3	3		High	High	High	High	High	High	Not Found
FALSE	High	Master Protein	K7N7A8	Uncharacterized protein (Fragment) OS=Homo sapiens OX=9606 PE=3 SV=2	0	10.204	9	3	5	3	1	449	48.8	5.22	17.49	3	0.987	0.887	0.94	1.353	1.074	1.841	86.6	85.5	76.8	81.4	117.2	93	159.4	3	3	3	3	3	3	2	High	High	High	High	High	High	High
FALSE	High	Master Protein	A0A0A0MS09	Immunoglobulin heavy constant delta (Fragment) OS=Homo sapiens OX=9606 GN=IGHD PE=1 SV=1	0.002	10.132	8	2	3	2	1	430	47.5	7.44	10.52	2	0.959	2.112	1.364	1.135	2.909	2.305	59.4	56.9	125.4	81	67.4	172.8	136.9	2	2	2	2	2	2	1	High	High	High	High	High	High	High
FALSE	High	Master Protein	A0A075B6I1	Immunoglobulin lambda variable 4-60 OS=Homo sapiens OX=9606 GN=IGLV4-60 PE=3 SV=1	0.002	10.106	16	2	6	2	1	120	13	6.25	21.81	2	0.913	0.799	0.93	1.037	1.35	2.181	85.3	77.8	68.1	79.3	88.5	115.1	186	2	2	2	2	2	2	2	High	High	High	High	High	High	High
FALSE	High	Master Protein	P21439	Phosphatidylcholine translocator ABCB4 OS=Homo sapiens OX=9606 GN=ABCB4 PE=1 SV=2	0.002	10.049	6	5	5	4	1	1286	141.4	8.48	10.47	5	1.581	1.123	0.924	0.877	0.96	1.566	87.2	137.8	97.9	80.6	76.4	83.6	136.5	2	2	2	2	2	2	1	High	High	High	High	High	High	High
FALSE	High	Master Protein	P61225	Ras-related protein Rap-2b OS=Homo sapiens OX=9606 GN=RAP2B PE=1 SV=1	0.002	10.036	12	2	3	2	1	183	20.5	4.81	9.26	2	1.068	0.789	0.896	1.129	0.966	0.01	119.7	127.8	94.5	107.2	135.2	115.6		2	2	2	2	2	2		High	High	High	High	High	High	Not Found
FALSE	High	Master Protein	A0A075B6K0	Immunoglobulin lambda variable 3-16 OS=Homo sapiens OX=9606 GN=IGLV3-16 PE=3 SV=2	0.002	9.945	18	2	10	1	1	115	12.5	4.65	39.83	2	1.054	0.852	0.84	1.162	0.738	0.01	124	130.7	105.6	104.2	144.1	91.5		1	1	1	1	1	1		High	High	High	High	High	High	Not Found
FALSE	High	Master Protein	Q07075	Glutamyl aminopeptidase OS=Homo sapiens OX=9606 GN=ENPEP PE=1 SV=3	0.002	9.879	3	4	4	4	1	957	109.2	5.47	8.45	4	4.114	1.482	1.048	1.062	1.003	0.532	68.4	281.2	101.3	71.6	72.6	68.6	36.3	4	4	4	4	4	4	1	High	High	High	High	High	High	High
FALSE	High	Master Protein	G8JLH6	Tetraspanin OS=Homo sapiens OX=9606 GN=CD9 PE=1 SV=2	0.002	9.822	7	2	7	2	1	251	28.1	7.2	24.99	2	0.594	0.474	0.668	0.45	0.508	0.184	180.5	107.3	85.5	120.6	81.2	91.6	33.2	2	2	2	2	2	2	1	High	High	High	High	High	High	High
FALSE	High	Master Protein	P08754	Guanine nucleotide-binding protein G(k) subunit alpha OS=Homo sapiens OX=9606 GN=GNAI3 PE=1 SV=3	0.002	9.8	11	4	5	1	1	354	40.5	5.69	14.09	4	1.039	1.049	0.967	0.921	1.119	0.01	114.9	119.3	120.5	111	105.7	128.6		1	1	1	1	1	1		High	High	High	High	High	High	Not Found
FALSE	High	Master Protein	P27918	Properdin OS=Homo sapiens OX=9606 GN=CFP PE=1 SV=2	0.002	9.619	7	3	3	3	1	469	51.2	7.9	8.74	3	1.215	1.458	1.554	1.76	1.161	0.704	79.1	96	115.3	122.9	139.2	91.8	55.7	3	3	3	3	3	3	1	High	High	High	High	High	High	High
FALSE	High	Master Protein	A0A075B6H9	Immunoglobulin lambda variable 4-69 OS=Homo sapiens OX=9606 GN=IGLV4-69 PE=1 SV=1	0.002	9.467	34	3	9	2	1	119	12.8	6.51	27.58	3	1.048	1.034	0.989	1.42	1.627	2.614	71.9	75.4	74.4	71.1	102.1	117	188	2	2	2	2	2	2	2	High	High	High	High	High	High	High
FALSE	High	Master Protein	Q8IWA5	Choline transporter-like protein 2 OS=Homo sapiens OX=9606 GN=SLC44A2 PE=1 SV=3	0.002	9.431	4	3	4	3	1	706	80.1	8.57	12.27	3	0.886	0.771	0.933	1.089	0.91	0.291	119.1	105.4	91.8	111.1	129.7	108.3	34.6	3	3	3	3	3	3	1	High	High	High	High	High	High	High
FALSE	High	Master Protein	Q8TDB8	Solute carrier family 2, facilitated glucose transporter member 14 OS=Homo sapiens OX=9606 GN=SLC2A14 PE=2 SV=1	0.002	9.384	7	3	3	3	1	520	56.3	7.83	9.98	3	0.56	0.594	0.7	0.551	0.598	0.455	157	87.9	93.3	109.9	86.5	93.9	71.4	3	3	3	3	3	3	1	High	High	High	High	High	High	High
FALSE	High	Master Protein	P62805	Histone H4 OS=Homo sapiens OX=9606 GN=HIST1H4A PE=1 SV=2	0.002	9.368	29	3	3	3	1	103	11.4	11.36	10.11	3	1.512	1.279	0.733	0.748	0.81	0.433	107.4	162.5	137.4	78.8	80.4	87	46.5	3	3	3	3	3	3	1	High	High	High	High	High	High	High
FALSE	High	Master Protein	A0A2R8YE63	Epidermal growth factor receptor kinase substrate 8 OS=Homo sapiens OX=9606 GN=EPS8 PE=1 SV=1	0.002	9.351	5	3	3	3	1	839	93.7	8.15	9.46	3	3.177	1.12	1.084	0.864	0.82	0.01	86.8	275.7	97.2	94.1	75	71.2		3	3	3	3	3	3		High	High	High	High	High	High	Not Found
FALSE	High	Master Protein	P07737	Profilin-1 OS=Homo sapiens OX=9606 GN=PFN1 PE=1 SV=2	0.002	9.26	31	4	4	4	1	140	15	8.27	13.37	4	0.979	0.716	0.786	0.745	0.903	0.362	127.5	124.8	91.3	100.1	95	115.1	46.1	4	4	4	4	4	4	1	High	High	High	High	High	High	High
FALSE	High	Master Protein	A0A087WWM1	Mucin-1 OS=Homo sapiens OX=9606 GN=MUC1 PE=1 SV=1	0.002	9.237	2	2	3	2	1	1262	122.9	7.56	9.43	2	1.684	0.86	0.735	0.82	1.165	0.616	101.8	171.4	87.5	74.8	83.4	118.5	62.7	2	2	2	2	2	2	1	High	High	High	High	High	High	High
FALSE	High	Master Protein	Q9Y6C2	EMILIN-1 OS=Homo sapiens OX=9606 GN=EMILIN1 PE=1 SV=3	0.002	9.233	4	3	4	3	1	1016	106.6	5.17	12.88	3	0.93	1.04	0.949	1.054	0.793	0.01	121.4	112.9	126.3	115.2	127.9	96.3		3	3	3	3	3	3		High	High	High	High	High	High	Not Found
FALSE	High	Master Protein	Q13790	Apolipoprotein F OS=Homo sapiens OX=9606 GN=APOF PE=1 SV=2	0.002	9.091	8	2	3	2	1	326	35.4	5.64	10.44	2	1.428	1.524	1.067	1.215	0.778	0.01	99.8	142.6	152.1	106.5	121.3	77.7		2	2	2	2	2	2		High	High	High	High	High	High	Not Found
FALSE	High	Master Protein	Q9Y6Z7	Collectin-10 OS=Homo sapiens OX=9606 GN=COLEC10 PE=1 SV=2	0.002	9.031	14	4	4	4	1	277	30.7	7.33	11.27	4	1.203	1.037	0.947	0.92	1.911	1.198	85.2	102.5	88.4	80.7	78.4	162.8	102	4	4	4	4	4	4	1	High	High	High	High	High	High	High
FALSE	High	Master Protein	Q5JWF2	Guanine nucleotide-binding protein G(s) subunit alpha isoforms XLas OS=Homo sapiens OX=9606 GN=GNAS PE=1 SV=2	0.002	9.026	4	3	4	2	1	1037	111	5.03	12.12	3	1.437	1.013	1.041	1.014	1.343	0.01	102.2	146.9	103.6	106.5	103.6	137.3		1	1	1	1	1	1		High	High	High	High	High	High	Not Found
FALSE	High	Master Protein	P49720	Proteasome subunit beta type-3 OS=Homo sapiens OX=9606 GN=PSMB3 PE=1 SV=2	0.002	8.898	16	3	3	3	1	205	22.9	6.55	10.2	3	0.779	0.605	0.598	0.478	0.453	0.28	166.9	130	100.9	99.9	79.9	75.6	46.7	3	3	3	3	3	3	1	High	High	High	High	High	High	High
FALSE	High	Master Protein	P08697	Alpha-2-antiplasmin OS=Homo sapiens OX=9606 GN=SERPINF2 PE=1 SV=3	0.003	8.886	8	3	3	3	1	491	54.5	6.29	7.17	3	0.822	0.764	0.998	0.932	0.866	0.485	119.3	98	91.2	119	111.3	103.3	57.8	3	3	3	3	3	3	1	High	High	High	High	High	High	High
FALSE	High	Master Protein	A0A0G2JRQ6	Uncharacterized protein (Fragment) OS=Homo sapiens OX=9606 PE=1 SV=4	0.003	8.85	29	3	10	3	1	117	12.7	8.29	30.56	3	0.584	1.043	0.674	0.904	0.535	0.538	132.6	77.5	138.3	89.4	119.8	71	71.4	3	3	3	3	3	3	3	High	High	High	High	High	High	High
FALSE	High	Master Protein	P05109	Protein S100-A8 OS=Homo sapiens OX=9606 GN=S100A8 PE=1 SV=1	0.003	8.81	28	3	5	3	1	93	10.8	7.03	13.85	3	1.231	0.771	0.885	0.776	0.818	0.663	113.9	140.2	87.8	100.8	88.4	93.2	75.5	3	3	3	3	3	3	2	High	High	High	High	High	High	High
FALSE	High	Master Protein	P05023	Sodium/potassium-transporting ATPase subunit alpha-1 OS=Homo sapiens OX=9606 GN=ATP1A1 PE=1 SV=1	0.003	8.805	3	2	2	2	1	1023	112.8	5.49	8.33	2	0.958	0.997	1	1.077	0.995	1.13	97.8	93.7	97.5	97.8	105.3	97.3	110.5	2	2	2	2	2	2	1	High	High	High	High	High	High	High
FALSE	High	Master Protein	Q9NSC7	Alpha-N-acetylgalactosaminide alpha-2,6-sialyltransferase 1 OS=Homo sapiens OX=9606 GN=ST6GALNAC1 PE=2 SV=1	0.003	8.676	7	3	4	3	1	600	68.5	9.92	12.41	3	0.733	0.851	0.821	1.278	1.54	1.604	89.4	65.6	76.1	73.4	114.3	137.7	143.4	3	3	3	3	3	3	1	High	High	High	High	High	High	High
FALSE	High	Master Protein	P16150	Leukosialin OS=Homo sapiens OX=9606 GN=SPN PE=1 SV=1	0.003	8.662	8	3	3	3	1	400	40.3	5.1	9.86	3	1.341	1.176	1.29	1.42	1.243	0.43	88.6	118.8	104.2	114.3	125.8	110.1	38.1	3	3	3	3	3	3	1	High	High	High	High	High	High	High
FALSE	High	Master Protein	P22234	Multifunctional protein ADE2 OS=Homo sapiens OX=9606 GN=PAICS PE=1 SV=3	0.003	8.653	10	3	3	3	1	425	47	7.23	8.95	3	0.912	1.411	0.993	1.151	1.906	0.01	94.9	86.6	134	94.3	109.3	181		2	2	2	2	2	2		High	High	High	High	High	High	Not Found
FALSE	High	Master Protein	P43652	Afamin OS=Homo sapiens OX=9606 GN=AFM PE=1 SV=1	0.003	8.418	7	3	3	3	1	599	69	5.9	10.16	3	0.92	0.922	1.318	0.992	0.837	0.01	116.9	107.5	107.7	154	116	97.9		3	3	3	3	3	3		High	High	High	High	High	High	Not Found
FALSE	High	Master Protein	A0A075B6I0	Immunoglobulin lambda variable 8-61 OS=Homo sapiens OX=9606 GN=IGLV8-61 PE=3 SV=7	0.003	8.396	15	2	5	2	1	122	12.8	4.55	15.26	2	1.075	1.212	0.963	1.173	1.318	3.321	69.6	74.8	84.3	67	81.6	91.7	231	2	2	2	2	2	2	2	High	High	High	High	High	High	High
FALSE	High	Master Protein	Q9H4G4	Golgi-associated plant pathogenesis-related protein 1 OS=Homo sapiens OX=9606 GN=GLIPR2 PE=1 SV=3	0.003	8.376	27	3	4	3	1	154	17.2	9.41	11.08	3	0.882	0.883	0.979	0.887	0.75	1.07	108.5	95.7	95.8	106.2	96.3	81.4	116.1	3	3	3	3	3	3	1	High	High	High	High	High	High	High
FALSE	High	Master Protein	A0A0A0MTH3	Integrin-linked protein kinase OS=Homo sapiens OX=9606 GN=ILK PE=1 SV=1	0.003	8.281	7	3	4	3	1	483	54.6	7.97	13.82	3	0.745	0.653	1.018	0.916	0.967	0.27	125.7	93.6	82.1	128	115.1	121.5	34	3	3	3	3	3	3	1	High	High	High	High	High	High	High
FALSE	High	Master Protein	P52566	Rho GDP-dissociation inhibitor 2 OS=Homo sapiens OX=9606 GN=ARHGDIB PE=1 SV=3	0.003	8.252	15	2	3	2	1	201	23	5.21	7.2	2	1.144	0.734	0.679	0.877	0.963	0.01	129.7	148.4	95.2	88.1	113.7	124.9		2	2	2	2	2	2		High	High	High	High	High	High	Not Found
FALSE	High	Master Protein	Q15582	Transforming growth factor-beta-induced protein ig-h3 OS=Homo sapiens OX=9606 GN=TGFBI PE=1 SV=1	0.003	8.243	4	2	2	2	1	683	74.6	7.71	9.1	2	1.287	1.875	0.892	0.922	0.783	0.01	103.6	133.3	194.2	92.3	95.5	81.1		2	2	2	2	2	2		High	High	High	High	High	High	Not Found
FALSE	High	Master Protein	I3L4C2	Brain-specific angiogenesis inhibitor 1-associated protein 2 OS=Homo sapiens OX=9606 GN=BAIAP2 PE=1 SV=1	0.003	8.203	6	3	3	3	1	553	61.3	8.94	6.74	3	1.816	0.922	0.891	1.063	0.973	1.076	90.4	164.2	83.4	80.6	96.2	88	97.3	3	3	3	3	3	3	2	High	High	High	High	High	High	High
FALSE	High	Master Protein	Q8WWA0	Intelectin-1 OS=Homo sapiens OX=9606 GN=ITLN1 PE=1 SV=1	0.003	8.167	10	2	4	2	1	313	34.9	6.01	14.33	2	0.538	0.708	0.584	0.611	0.937	0.01	159.9	86	113.2	93.4	97.7	149.9		2	2	2	2	2	2		High	High	High	High	High	High	Not Found
FALSE	High	Master Protein	P06276	Cholinesterase OS=Homo sapiens OX=9606 GN=BCHE PE=1 SV=1	0.003	8.108	7	3	3	3	1	602	68.4	7.42	6.23	3	0.82	1.075	1.665	1.359	0.929	0.01	102.2	83.8	109.9	170.2	139	94.9		2	2	2	2	2	2		High	High	High	High	High	High	Not Found
FALSE	High	Master Protein	A0A087WYE8	Immunoglobulin heavy variable 1/OR21-1 (non-functional) (Fragment) OS=Homo sapiens OX=9606 GN=IGHV1OR21-1 PE=1 SV=1	0.002	8.022	19	2	15	1	1	117	13	8.18	28.65	2	0.703	0.864	1.152	0.825	0.635	0.01	135.2	95	116.7	155.7	111.5	85.9		1	1	1	1	1	1		High	High	High	High	High	High	Not Found
FALSE	High	Master Protein	A0A0C4DH24	Immunoglobulin kappa variable 6-21 OS=Homo sapiens OX=9606 GN=IGKV6-21 PE=3 SV=1	0.002	7.955	29	2	4	1	1	114	12.4	7.28	16.63	2	1.094	1.403	1.064	2.963	0.925	1.934	67.4	73.7	94.6	71.7	199.8	62.3	130.4	1	1	1	1	1	1	1	High	High	High	High	High	High	High
FALSE	High	Master Protein	A0A0B4J1V2	Immunoglobulin heavy variable 2-26 OS=Homo sapiens OX=9606 GN=IGHV2-26 PE=3 SV=1	0.002	7.945	30	3	4	3	1	119	13.2	8.29	13.12	3	0.884	0.763	0.954	1.266	1.107	1.886	89.1	78.8	67.9	84.9	112.7	98.6	168	3	3	3	3	3	3	2	High	High	High	High	High	High	High
FALSE	High	Master Protein	P04406	Glyceraldehyde-3-phosphate dehydrogenase OS=Homo sapiens OX=9606 GN=GAPDH PE=1 SV=3	0.002	7.779	13	3	3	3	1	335	36	8.46	10.22	3	0.645	0.63	0.724	0.7	0.798	1.036	126.5	81.6	79.7	91.6	88.6	101	131	3	3	3	3	3	3	2	High	High	High	High	High	High	High
FALSE	High	Master Protein	P15169	Carboxypeptidase N catalytic chain OS=Homo sapiens OX=9606 GN=CPN1 PE=1 SV=1	0.002	7.606	6	2	2	2	1	458	52.3	7.34	7.47	2	0.899	1.064	0.786	0.794	0.505	0.01	138.6	124.7	147.6	108.9	110.1	70		2	2	2	2	2	2		High	High	High	High	High	High	Not Found
FALSE	High	Master Protein	K7ES00	Histone H3.3 (Fragment) OS=Homo sapiens OX=9606 GN=H3F3B PE=1 SV=1	0.002	7.561	15	3	4	3	1	151	16.6	11.84	11.8	3	1.552	1.278	0.774	0.639	0.694	0.634	106.5	165.3	136.2	82.4	68.1	74	67.5	3	3	3	3	3	3	2	High	High	High	High	High	High	High
FALSE	High	Master Protein	P02452	Collagen alpha-1(I) chain OS=Homo sapiens OX=9606 GN=COL1A1 PE=1 SV=5	0.002	7.482	3	4	5	4	1	1464	138.9	5.8	12.31	4	0.935	1.522	1.9	0.969	2.732	3.203	57.1	53.4	86.9	108.5	55.3	156	182.9	4	4	4	4	4	4	3	High	High	High	High	High	High	High
FALSE	High	Master Protein	P61106	Ras-related protein Rab-14 OS=Homo sapiens OX=9606 GN=RAB14 PE=1 SV=4	0.002	7.476	12	2	2	1	1	215	23.9	6.21	6.79	2	1.305	1.28	1.261	1.111	1.071	0.01	99.6	130	127.5	125.6	110.6	106.7		1	1	1	1	1	1		High	High	High	High	High	High	Not Found
FALSE	High	Master Protein	P12814	Alpha-actinin-1 OS=Homo sapiens OX=9606 GN=ACTN1 PE=1 SV=2	0.002	7.389	3	2	2	2	1	892	103	5.41	6.33	2	2.114	0.906	1.288	1.095	1.196	0.01	92.1	194.7	83.5	118.6	100.9	110.2		2	2	2	2	2	2		High	High	High	High	High	High	Not Found
FALSE	High	Master Protein	P20618	Proteasome subunit beta type-1 OS=Homo sapiens OX=9606 GN=PSMB1 PE=1 SV=2	0.006	7.285	10	2	2	2	1	241	26.5	8.13	8.61	2	0.762	0.591	0.601	0.486	0.466	0.267	167.8	127.9	99.2	100.8	81.5	78.1	44.7	2	2	2	2	2	2	1	High	High	High	High	High	High	High
FALSE	High	Master Protein	A0A0G2JMH6	HLA class II histocompatibility antigen, DR alpha chain OS=Homo sapiens OX=9606 GN=HLA-DRA PE=1 SV=1	0.006	7.25	9	2	2	2	1	254	28.6	5	7.73	2	1.035	0.823	0.929	1.34	1.203	1.417	90.4	93.5	74.4	84	121.1	108.7	128	2	2	2	2	2	2	1	High	High	High	High	High	High	High
FALSE	High	Master Protein	D6RAR4	Hepatocyte growth factor activator OS=Homo sapiens OX=9606 GN=HGFAC PE=1 SV=1	0.006	7.144	5	3	3	3	1	662	71.4	7.05	9.27	3	1.062	1.034	1.075	1.026	1.057	1.362	91.9	97.6	95	98.8	94.3	97.2	125.2	3	3	3	3	3	3	2	High	High	High	High	High	High	High
FALSE	High	Master Protein	P13688	Carcinoembryonic antigen-related cell adhesion molecule 1 OS=Homo sapiens OX=9606 GN=CEACAM1 PE=1 SV=2	0.006	7.103	7	2	2	2	1	526	57.5	5.97	8.22	2	1.17	1.56	1.004	1.098	1.057	0.865	90.3	105.6	140.8	90.6	99.1	95.4	78.1	2	2	2	2	2	2	1	High	High	High	High	High	High	High
FALSE	High	Master Protein	Q08722	Leukocyte surface antigen CD47 OS=Homo sapiens OX=9606 GN=CD47 PE=1 SV=1	0.006	6.88	6	2	3	2	1	323	35.2	7.21	9.07	2	1.149	0.952	0.99	0.984	0.987	0.01	115.5	132.7	109.9	114.3	113.6	114		2	2	2	2	2	2		High	High	High	High	High	High	Not Found
FALSE	High	Master Protein	A0A075B7B6	Immunoglobulin heavy variable 4/OR15-8 (non-functional) (Fragment) OS=Homo sapiens OX=9606 GN=IGHV4OR15-8 PE=4 SV=1	0.006	6.873	20	3	4	2	1	117	13	9.6	10.39	3	1.435	1.053	0.873	1.191	0.853	1.039	94	134.9	99	82.1	112	80.2	97.7	2	2	2	2	2	2	1	High	High	High	High	High	High	High
FALSE	High	Master Protein	P04278	Sex hormone-binding globulin OS=Homo sapiens OX=9606 GN=SHBG PE=1 SV=2	0.006	6.749	9	2	3	2	1	402	43.8	6.71	9.69	2	0.835	0.843	0.837	0.968	0.936	0.01	129.2	107.9	108.9	108.1	125	120.9		1	1	1	1	1	1		High	High	High	High	High	High	Not Found
FALSE	High	Master Protein	A0A075B6S9	Immunoglobulin kappa variable 1-37 (non-functional) (Fragment) OS=Homo sapiens OX=9606 GN=IGKV1-37 PE=1 SV=7	0.006	6.744	14	1	3	1	1	117	12.7	9.25	10.92	1	1.246	1.212	1.093	1.234	1.362	0.01	98	122.1	118.7	107	120.8	133.4		1	1	1	1	1	1		High	High	High	High	High	High	Not Found
FALSE	High	Master Protein	P61204	ADP-ribosylation factor 3 OS=Homo sapiens OX=9606 GN=ARF3 PE=1 SV=2	0.006	6.674	14	2	2	2	1	181	20.6	7.43	6.67	2	1.271	0.974	0.887	1.013	0.869	0.86	101.8	129.4	99.2	90.3	103.1	88.6	87.5	2	2	2	2	2	2	1	High	High	High	High	High	High	High
FALSE	High	Master Protein	C9JIF9	Acylamino-acid-releasing enzyme OS=Homo sapiens OX=9606 GN=APEH PE=1 SV=1	0.006	6.623	7	3	3	3	1	737	81.6	5.54	8.49	3	1.109	1.169	1.135	1.225	3.168	0.01	79.5	88.2	92.9	90.2	97.4	251.8		2	2	2	2	2	2		High	High	High	High	High	High	Not Found
FALSE	High	Master Protein	Q9NQ79	Cartilage acidic protein 1 OS=Homo sapiens OX=9606 GN=CRTAC1 PE=1 SV=2	0.006	6.608	5	2	2	2	1	661	71.4	5.12	6.69	2	1.154	1.236	1.285	1.468	1.23	0.01	94.9	109.6	117.3	122	139.3	116.7		1	1	1	1	1	1		High	High	High	High	High	High	Not Found
FALSE	High	Master Protein	Q86YZ3	Hornerin OS=Homo sapiens OX=9606 GN=HRNR PE=1 SV=2	0.006	6.54	3	3	3	3	1	2850	282.2	10.04	4.83	3	1.668	1.072	0.867	0.969	2.311	3.846	59.7	99.5	64	51.7	57.8	137.9	229.4	2	2	2	2	2	2	2	High	High	High	High	High	High	High
FALSE	High	Master Protein	A0A0A0MS14	Immunoglobulin heavy variable 1-45 OS=Homo sapiens OX=9606 GN=IGHV1-45 PE=3 SV=1	0.006	6.54	9	1	2	1	1	117	13.5	9.1	6.18	1	1.152	1.042	1.169	1.188	1.069	0.01	105.7	121.8	110.2	123.6	125.7	113		2	2	2	2	2	2		High	High	High	High	High	High	Not Found
FALSE	High	Master Protein	O95342	Bile salt export pump OS=Homo sapiens OX=9606 GN=ABCB11 PE=1 SV=2	0.006	6.501	2	3	3	2	1	1321	146.3	6.57	7.94	3	3.932	1.297	0.873	1.112	0.803	0.01	77.6	305.2	100.7	67.7	86.3	62.4		2	2	2	2	2	2		High	High	High	High	High	High	Not Found
FALSE	High	Master Protein	P13224	Platelet glycoprotein Ib beta chain OS=Homo sapiens OX=9606 GN=GP1BB PE=1 SV=1	0.006	6.43	5	1	2	1	1	206	21.7	9.31	5.98	1	0.766	0.67	0.7	0.882	1.254	0.01	132.8	101.7	89	92.9	117.1	166.5		1	1	1	1	1	1		High	High	High	High	High	High	Not Found
FALSE	High	Master Protein	P50395	Rab GDP dissociation inhibitor beta OS=Homo sapiens OX=9606 GN=GDI2 PE=1 SV=2	0.006	6.41	8	2	2	2	1	445	50.6	6.47	6	2	1.107	0.776	0.751	0.766	0.716	0.01	136.8	151.4	106.2	102.8	104.8	98		2	2	2	2	2	2		High	High	High	High	High	High	Not Found
FALSE	High	Master Protein	P05362	Intercellular adhesion molecule 1 OS=Homo sapiens OX=9606 GN=ICAM1 PE=1 SV=2	0.006	6.349	5	2	2	2	1	532	57.8	7.99	6.24	2	1.245	1.236	1.409	1.401	1.326	3.723	61.7	76.8	76.3	87	86.5	81.8	229.8	2	2	2	2	2	2	2	High	High	High	High	High	High	High
FALSE	High	Master Protein	A0A075B7F1	Immunoglobulin heavy variable 3/OR16-8 (non-functional) (Fragment) OS=Homo sapiens OX=9606 GN=IGHV3OR16-8 PE=1 SV=1	0.006	6.185	19	1	2	1	1	116	12.7	5.96	7.06	1	0.863	1.191	0.754	0.984	0.865	0.01	123.7	106.8	147.4	93.3	121.7	107		2	2	2	2	2	2		High	High	High	High	High	High	Not Found
FALSE	High	Master Protein	O00182	Galectin-9 OS=Homo sapiens OX=9606 GN=LGALS9 PE=1 SV=2	0.006	6.07	8	2	3	2	1	355	39.5	9.17	9.03	2	1.021	1.335	1.248	1.16	0.993	0.01	103.6	105.7	138.3	129.3	120.2	102.9		2	2	2	2	2	2		High	High	High	High	High	High	Not Found
FALSE	High	Master Protein	P00338	L-lactate dehydrogenase A chain OS=Homo sapiens OX=9606 GN=LDHA PE=1 SV=2	0.006	5.961	7	2	2	2	1	332	36.7	8.27	5.74	2	1.045	0.802	0.931	1.089	1.126	1.511	93.3	97.5	74.8	86.8	101.6	105.1	140.9	2	2	2	2	2	2	1	High	High	High	High	High	High	High
FALSE	High	Master Protein	P01705	Immunoglobulin lambda variable 2-23 OS=Homo sapiens OX=9606 GN=IGLV2-23 PE=1 SV=2	0.006	5.951	14	2	6	2	1	113	11.9	5.91	15.65	2	1.157	0.86	1.006	0.945	0.688	0.01	123.8	143.2	106.5	124.5	116.9	85.2		3	3	3	3	3	3		High	High	High	High	High	High	Not Found
FALSE	High	Master Protein	O95445	Apolipoprotein M OS=Homo sapiens OX=9606 GN=APOM PE=1 SV=2	0.006	5.825	14	3	4	3	1	188	21.2	6.01	10.9	3	0.905	1.199	1.178	0.973	0.629	0.956	102.3	92.7	122.7	120.5	99.5	64.3	97.9	3	3	3	3	3	3	1	High	High	High	High	High	High	High
FALSE	High	Master Protein	Q15389	Angiopoietin-1 OS=Homo sapiens OX=9606 GN=ANGPT1 PE=1 SV=2	0.006	5.821	5	2	2	2	1	498	57.5	6.76	6.41	2	0.843	1.02	0.89	0.9	0.713	0.01	130.4	110	133.1	116.1	117.4	93		2	2	2	2	2	2		High	High	High	High	High	High	Not Found
FALSE	High	Master Protein	P78324	Tyrosine-protein phosphatase non-receptor type substrate 1 OS=Homo sapiens OX=9606 GN=SIRPA PE=1 SV=2	0.006	5.786	6	2	2	2	1	504	54.9	6.98	6.06	2	2.14	1.247	1.686	0.899	1.863	3.106	58.6	125.4	73.1	98.8	52.7	109.2	182.1	2	2	2	2	2	2	1	High	High	High	High	High	High	High
FALSE	High	Master Protein	Q13867	Bleomycin hydrolase OS=Homo sapiens OX=9606 GN=BLMH PE=1 SV=1	0.006	5.741	7	2	2	2	1	455	52.5	6.27	6.05	2	0.936	0.987	0.868	0.844	1.172	1.179	100.2	93.8	98.9	87	84.5	117.5	118.2	2	2	2	2	2	2	1	High	High	High	High	High	High	High
FALSE	High	Master Protein	G3V2N0	Guanine nucleotide-binding protein subunit gamma OS=Homo sapiens OX=9606 GN=GNG2 PE=1 SV=1	0.006	5.719	21	2	2	2	1	110	12.4	8.91	6.25	2	0.946	0.949	1.096	1.064	1.038	1.065	97.8	92.5	92.8	107.2	104	101.5	104.2	2	2	2	2	2	2	1	High	High	High	High	High	High	High
FALSE	High	Master Protein	E7EMK3	Flotillin-2 OS=Homo sapiens OX=9606 GN=FLOT2 PE=1 SV=1	0.006	5.668	5	2	2	2	1	483	53.1	5.24	6.47	2	0.858	1.156	0.814	1.005	0.839	0.01	123.4	105.9	142.7	100.4	124.1	103.5		2	2	2	2	2	2		High	High	High	High	High	High	Not Found
FALSE	High	Master Protein	P22352	Glutathione peroxidase 3 OS=Homo sapiens OX=9606 GN=GPX3 PE=1 SV=2	0.006	5.536	16	3	3	3	1	226	25.5	8.13	8.17	3	0.89	1.141	0.821	1.016	0.936	0.385	113.1	100.7	129	92.8	114.9	105.9	43.6	3	3	3	3	3	3	1	High	High	High	High	High	High	High
FALSE	High	Master Protein	P28062	Proteasome subunit beta type-8 OS=Homo sapiens OX=9606 GN=PSMB8 PE=1 SV=3	0.006	5.512	7	2	2	2	1	276	30.3	7.43	7.31	2	0.721	0.627	0.489	0.391	0.398	0.01	193.1	139.2	121.1	94.4	75.4	76.8		2	2	2	2	2	2		High	High	High	High	High	High	Not Found
FALSE	High	Master Protein	Q8IWL1	Pulmonary surfactant-associated protein A2 OS=Homo sapiens OX=9606 GN=SFTPA2 PE=1 SV=1	0.006	5.453	8	2	2	2	1	248	26.2	5.17	6.59	2	2.237	1.372	0.805	0.721	0.691	0.01	102.6	229.4	140.8	82.5	73.9	70.9		2	2	2	2	2	2		High	High	High	High	High	High	Not Found
FALSE	High	Master Protein	Q9BXR6	Complement factor H-related protein 5 OS=Homo sapiens OX=9606 GN=CFHR5 PE=1 SV=1	0.006	5.435	4	2	2	1	1	569	64.4	7.06	3.79	2	0.965	1.493	1.28	1.098	1.223	0.01	99.1	95.7	148	126.9	108.9	121.3		1	1	1	1	1	1		High	High	High	High	High	High	Not Found
FALSE	High	Master Protein	P81605	Dermcidin OS=Homo sapiens OX=9606 GN=DCD PE=1 SV=2	0.006	5.317	10	1	4	1	1	110	11.3	6.54	9.17	1	0.829	1.101	0.955	0.839	1.267	0.754	103.8	86.1	114.2	99.2	87	131.5	78.3	1	1	1	1	1	1	1	High	High	High	High	High	High	High
FALSE	High	Master Protein	P50895	Basal cell adhesion molecule OS=Homo sapiens OX=9606 GN=BCAM PE=1 SV=2	0.006	5.299	4	2	2	2	1	628	67.4	5.81	5.22	2	1.157	0.954	0.801	1.111	1.131	0.01	113.8	131.6	108.5	91.2	126.4	128.6		2	2	2	2	2	2		High	High	High	High	High	High	Not Found
FALSE	High	Master Protein	Q08830	Fibrinogen-like protein 1 OS=Homo sapiens OX=9606 GN=FGL1 PE=1 SV=3	0.006	5.294	11	2	2	2	1	312	36.4	5.87	6.03	2	1.103	1.455	1.071	1.536	1.19	0.01	95.2	105	138.5	101.9	146.2	113.2		1	1	1	1	1	1		High	High	High	High	High	High	Not Found
FALSE	High	Master Protein	Q6UWD8	Transmembrane protein C16orf54 OS=Homo sapiens OX=9606 GN=C16orf54 PE=1 SV=1	0.006	5.29	17	2	2	2	1	224	24.3	6.19	8.12	2	0.713	1.024	1.118	1.162	0.853	0.947	102.7	73.3	105.1	114.8	119.3	87.6	97.2	2	2	2	2	2	2	1	High	High	High	High	High	High	High
FALSE	High	Master Protein	Q8N5I2	Arrestin domain-containing protein 1 OS=Homo sapiens OX=9606 GN=ARRDC1 PE=1 SV=1	0.006	5.253	6	2	2	2	1	433	46	7.02	7.12	2	1.773	0.993	0.883	0.944	0.772	0.01	110	195	109.2	97.1	103.8	84.9		2	2	2	2	2	2		High	High	High	High	High	High	Not Found
FALSE	High	Master Protein	C9JEE0	Immunoglobulin lambda-like polypeptide 1 (Fragment) OS=Homo sapiens OX=9606 GN=IGLL1 PE=1 SV=1	0.006	5.24	14	2	4	1	1	180	19.2	10.68	14.1	2	1.184	1.033	1.098	1.141	1.177	2.675	75.2	89	77.7	82.6	85.8	88.5	201.2	1	1	1	1	1	1	1	High	High	High	High	High	High	High
FALSE	High	Master Protein	Q7Z4W1	L-xylulose reductase OS=Homo sapiens OX=9606 GN=DCXR PE=1 SV=2	0.006	5.197	11	2	2	2	1	244	25.9	8.1	6.45	2	0.814	0.868	0.442	0.538	0.416	0.01	171.7	139.7	148.9	75.8	92.4	71.5		1	1	1	1	1	1		High	High	High	High	High	High	Not Found
FALSE	High	Master Protein	P25787	Proteasome subunit alpha type-2 OS=Homo sapiens OX=9606 GN=PSMA2 PE=1 SV=2	0.006	5.054	9	2	2	2	1	234	25.9	7.43	8.27	2	0.897	0.713	0.545	0.522	0.42	0.379	156.4	140.3	111.4	85.2	81.7	65.7	59.3	2	2	2	2	2	2	1	High	High	High	High	High	High	High
FALSE	High	Master Protein	P50502	Hsc70-interacting protein OS=Homo sapiens OX=9606 GN=ST13 PE=1 SV=2	0.006	4.976	6	2	2	2	1	369	41.3	5.27	2.64	2	1.296	0.902	0.805	1.298	1.805	0.01	98.5	127.7	88.8	79.3	127.9	177.8		1	1	1	1	1	1		High	High	High	High	High	High	Not Found
FALSE	High	Master Protein	Q86UP6	CUB and zona pellucida-like domain-containing protein 1 OS=Homo sapiens OX=9606 GN=CUZD1 PE=2 SV=1	0.006	4.919	4	2	3	2	1	607	68.1	6.47	9.06	2	1.486	0.926	0.617	0.765	2.393	3.161	67.6	100.5	62.6	41.8	51.8	161.9	213.8	2	2	2	2	2	2	1	High	High	High	High	High	High	High
FALSE	High	Master Protein	Q6GTS8	N-fatty-acyl-amino acid synthase/hydrolase PM20D1 OS=Homo sapiens OX=9606 GN=PM20D1 PE=2 SV=3	0.006	4.871	5	2	2	2	1	502	55.7	6.67	5.89	2	0.645	0.865	0.817	0.796	0.794	0.01	142.4	91.8	123.2	116.3	113.3	113.1		2	2	2	2	2	2		High	High	High	High	High	High	Not Found
FALSE	High	Master Protein	P01721	Immunoglobulin lambda variable 6-57 OS=Homo sapiens OX=9606 GN=IGLV6-57 PE=1 SV=2	0.006	4.847	17	1	1	1	1	117	12.6	4.78	5.95	1	0.876	0.649	0.489	0.505	0.466	0.01	175.7	153.9	114.1	85.9	88.7	81.8		1	1	1	1	1	1		High	High	High	High	High	High	Not Found
FALSE	High	Master Protein	A0A0A0MT69	Immunoglobulin kappa joining 4 (Fragment) OS=Homo sapiens OX=9606 GN=IGKJ4 PE=1 SV=1	0.005	4.843	67	1	2	1	1	12	1.2	8.84	6.68	1	1.086	1.266	1.031	1.003	1.547	2.323	75.6	82.1	95.7	78	75.9	117	175.7	1	1	1	1	1	1	1	High	High	High	High	High	High	High
FALSE	High	Master Protein	O75955	Flotillin-1 OS=Homo sapiens OX=9606 GN=FLOT1 PE=1 SV=3	0.005	4.834	6	2	2	2	1	427	47.3	7.49	5.16	2	0.943	1.186	0.984	1.256	1.312	0.01	104.8	98.8	124.3	103.1	131.6	137.5		2	2	2	2	2	2		High	High	High	High	High	High	Not Found
FALSE	High	Master Protein	Q15758	Neutral amino acid transporter B(0) OS=Homo sapiens OX=9606 GN=SLC1A5 PE=1 SV=2	0.005	4.823	5	2	3	2	1	541	56.6	5.48	9.23	2	1.483	1.136	0.969	1.383	1.464	0.01	94.1	139.6	107	91.3	130.2	137.8		2	2	2	2	2	2		High	High	High	High	High	High	Not Found
FALSE	High	Master Protein	A0A087WVC6	Receptor-type tyrosine-protein phosphatase eta OS=Homo sapiens OX=9606 GN=PTPRJ PE=1 SV=1	0.005	4.812	2	2	2	2	1	1342	146.5	5.62	5.31	2	1.175	1.004	0.91	0.876	0.854	0.01	120.3	141.3	120.8	109.5	105.4	102.7		2	2	2	2	2	2		High	High	High	High	High	High	Not Found
FALSE	High	Master Protein	Q658P3	Metalloreductase STEAP3 OS=Homo sapiens OX=9606 GN=STEAP3 PE=1 SV=2	0.005	4.762	4	2	2	2	1	488	54.6	8.6	5.06	2	1.336	1.177	1.009	1.535	1.359	0.01	94.4	126.1	111.1	95.2	144.9	128.3		2	2	2	2	2	2		High	High	High	High	High	High	Not Found
FALSE	High	Master Protein	J3KNB4	Cathelicidin antimicrobial peptide OS=Homo sapiens OX=9606 GN=CAMP PE=1 SV=1	0.005	4.743	12	2	2	2	1	173	19.6	9.41	5.83	2	0.917	1.084	1.242	1.317	1.315	2.023	78.7	72.2	85.3	97.7	103.6	103.4	159.2	2	2	2	2	2	2	2	High	High	High	High	High	High	High
FALSE	High	Master Protein	Q16706	Alpha-mannosidase 2 OS=Homo sapiens OX=9606 GN=MAN2A1 PE=1 SV=2	0.005	4.719	3	3	3	3	1	1144	131.1	7.58	4.28	3	0.829	1.02	0.842	1.481	0.853	1.139	97.7	81	99.7	82.2	144.7	83.3	111.3	3	3	3	3	3	3	1	High	High	High	High	High	High	High
FALSE	High	Master Protein	P04745	Alpha-amylase 1 OS=Homo sapiens OX=9606 GN=AMY1A PE=1 SV=2	0.005	4.71	5	2	2	2	1	511	57.7	6.93	5.45	2	0.772	1.34	0.95	1.226	2.936	3.681	58.8	45.4	78.8	55.9	72.1	172.6	216.4	2	2	2	2	2	2	1	High	High	High	High	High	High	High
FALSE	High	Master Protein	A0A0B4J1V7	Immunoglobulin heavy variable 7-81 (non-functional) (Fragment) OS=Homo sapiens OX=9606 GN=IGHV7-81 PE=4 SV=1	0.005	4.684	6	1	3	1	1	117	12.9	7.11	7.6	1	2.149	0.384	0.489	0.639	0.629	1.113	109.3	235	41.9	53.5	69.9	68.8	121.6	1	1	1	1	1	1	1	High	High	High	High	High	High	High
FALSE	High	Master Protein	Q16822	Phosphoenolpyruvate carboxykinase [GTP], mitochondrial OS=Homo sapiens OX=9606 GN=PCK2 PE=1 SV=4	0.005	4.621	4	2	2	2	1	640	70.7	7.62	5.69	2	0.879	1.353	0.868	0.846	0.79	0.992	104	91.5	140.8	90.3	88	82.1	103.3	2	2	2	2	2	2	1	High	High	High	High	High	High	High
FALSE	High	Master Protein	Q96KN2	Beta-Ala-His dipeptidase OS=Homo sapiens OX=9606 GN=CNDP1 PE=1 SV=4	0.007	4.598	4	2	2	2	1	507	56.7	5.3	5.85	2	0.885	1.18	1.029	2.412	0.781	1.519	79.5	70.4	93.8	81.8	191.7	62	120.8	2	2	2	2	2	2	1	High	High	High	High	High	High	High
FALSE	High	Master Protein	P28072	Proteasome subunit beta type-6 OS=Homo sapiens OX=9606 GN=PSMB6 PE=1 SV=4	0.007	4.59	8	2	3	2	1	239	25.3	4.92	7.68	2	0.916	0.739	0.806	0.62	0.577	0.608	132.9	121.8	98.3	107.1	82.4	76.7	80.8	2	2	2	2	2	2	1	High	High	High	High	High	High	High
FALSE	High	Master Protein	P12821	Angiotensin-converting enzyme OS=Homo sapiens OX=9606 GN=ACE PE=1 SV=1	0.007	4.564	2	2	2	2	1	1306	149.6	6.39	5.74	2	0.809	0.565	0.713	0.951	0.788	0.01	145.1	117.3	82	103.4	137.9	114.3		1	1	1	1	1	1		High	High	High	High	High	High	Not Found
FALSE	High	Master Protein	O60667	Fas apoptotic inhibitory molecule 3 OS=Homo sapiens OX=9606 GN=FCMR PE=1 SV=1	0.007	4.527	5	1	1	1	1	390	43.1	9.74	5.28	1	1.017	1.144	1.031	1.225	1.136	0.01	106.8	108.7	122.2	110.1	130.8	121.4		1	1	1	1	1	1		High	High	High	High	High	High	Not Found
FALSE	High	Master Protein	A0A0A0MT89	Immunoglobulin kappa joining 1 OS=Homo sapiens OX=9606 GN=IGKJ1 PE=4 SV=2	0.007	4.506	67	1	2	1	1	12	1.4	8.84	7.27	1	0.868	0.543	0.74	0.91	0.634	1.442	114.1	99.1	61.9	84.4	103.8	72.3	164.5	1	1	1	1	1	1	1	High	High	High	High	High	High	High
FALSE	High	Master Protein	A0A075B6K6	Immunoglobulin lambda variable 4-3 OS=Homo sapiens OX=9606 GN=IGLV4-3 PE=3 SV=1	0.007	4.465	14	2	4	1	1	122	13.3	5.71	10.88	2	1.402	1.174	2.845	2.873	1.952	3.346	48	67.3	56.3	136.5	137.8	93.6	160.5	1	1	1	1	1	1	1	High	High	High	High	High	High	High
FALSE	High	Master Protein	P08962	CD63 antigen OS=Homo sapiens OX=9606 GN=CD63 PE=1 SV=2	0.007	4.432	3	1	3	1	1	238	25.6	7.81	9.11	1	0.925	0.909	0.691	0.89	0.688	0.01	137.2	126.9	124.7	94.8	122.1	94.4		1	1	1	1	1	1	1	High	High	High	High	High	High	High
FALSE	High	Master Protein	O00161	Synaptosomal-associated protein 23 OS=Homo sapiens OX=9606 GN=SNAP23 PE=1 SV=1	0.007	4.431	11	2	2	2	1	211	23.3	5.01	5.85	2	0.855	1.067	0.973	0.965	1.306	1.417	92.3	78.9	98.5	89.8	89.1	120.5	130.8	2	2	2	2	2	2	1	High	High	High	High	High	High	High
FALSE	High	Master Protein	Q15907	Ras-related protein Rab-11B OS=Homo sapiens OX=9606 GN=RAB11B PE=1 SV=4	0.007	4.348	13	2	2	2	1	218	24.5	5.94	5.96	2	1.078	0.992	0.875	0.88	0.986	0.777	106.3	114.5	105.4	93	93.5	104.8	82.6	2	2	2	2	2	2	1	High	High	High	High	High	High	High
FALSE	High	Master Protein	A0A0C4DGB5	Calpastatin OS=Homo sapiens OX=9606 GN=CAST PE=1 SV=1	0.007	4.308	2	1	1	1	1	754	81	5.1	4.47	1	0.958	1.729	1.048	1.254	2.379	0.01	83.7	80.2	144.6	87.7	104.9	199		1	1	1	1	1	1		High	High	High	High	High	High	Not Found
FALSE	High	Master Protein	Q99816	Tumor susceptibility gene 101 protein OS=Homo sapiens OX=9606 GN=TSG101 PE=1 SV=2	0.007	4.306	5	2	2	2	1	390	43.9	6.46	5.48	2	0.894	1.009	0.881	0.961	0.935	2.061	90.4	80.8	91.3	79.7	86.9	84.5	186.4	2	2	2	2	2	2	1	High	High	High	High	High	High	High
FALSE	High	Master Protein	A0A2R8Y4Z1	Protein HEG homolog 1 (Fragment) OS=Homo sapiens OX=9606 GN=HEG1 PE=1 SV=1	0.007	4.267	5	1	1	1	1	351	36.3	4.92	5.17	1	1.249	1.09	1.284	1.018	1.083	1.311	87.1	108.8	95	111.8	88.7	94.4	114.2	1	1	1	1	1	1	1	High	High	High	High	High	High	High
FALSE	High	Master Protein	Q8WWI5	Choline transporter-like protein 1 OS=Homo sapiens OX=9606 GN=SLC44A1 PE=1 SV=1	0.007	4.193	2	1	1	1	1	657	73.3	8.6	3.65	1	0.721	0.725	0.789	0.791	0.763	0.01	146.2	105.4	106	115.3	115.7	111.6		1	1	1	1	1	1		High	High	High	High	High	High	Not Found
FALSE	High	Master Protein	Q15942	Zyxin OS=Homo sapiens OX=9606 GN=ZYX PE=1 SV=1	0.007	4.178	3	1	2	1	1	572	61.2	6.67	7.04	1	0.573	0.765	0.719	0.727	0.682	0.01	156.7	89.8	119.9	112.7	114	106.9		1	1	1	1	1	1		High	High	High	High	High	High	Not Found
FALSE	High	Master Protein	A0A0D9SFB5	Alcohol dehydrogenase 4 OS=Homo sapiens OX=9606 GN=ADH4 PE=1 SV=1	0.007	4.174	7	2	2	2	1	391	41.6	7.91	3.45	2	1.212	0.98	0.788	0.839	0.937	0.01	121.6	147.4	119.2	95.8	102.1	114		2	2	2	2	2	2		High	High	High	High	High	High	Not Found
FALSE	High	Master Protein	P08571	Monocyte differentiation antigen CD14 OS=Homo sapiens OX=9606 GN=CD14 PE=1 SV=2	0.007	4.066	7	2	2	2	1	375	40.1	6.23	5.33	2	0.804	0.883	0.725	0.904	0.748	0.707	121.3	97.6	107.1	87.9	109.6	90.8	85.8	2	2	2	2	2	2	1	High	High	High	High	High	High	High
FALSE	High	Master Protein	P28074	Proteasome subunit beta type-5 OS=Homo sapiens OX=9606 GN=PSMB5 PE=1 SV=3	0.007	4.057	6	1	1	1	1	263	28.5	6.92	4.11	1	0.791	0.724	0.707	0.832	0.518	0.01	153.1	121.2	110.9	108.2	127.3	79.3		1	1	1	1	1	1		High	High	High	High	High	High	Not Found
FALSE	High	Master Protein	Q96F07	Cytoplasmic FMR1-interacting protein 2 OS=Homo sapiens OX=9606 GN=CYFIP2 PE=1 SV=2	0.007	4.052	1	1	1	1	1	1278	148.3	7.31	3.64	1	0.874	1.072	0.982	1.08	0.965	0.01	117.2	102.5	125.6	115	126.6	113.1		1	1	1	1	1	1		High	High	High	High	High	High	Not Found
FALSE	High	Master Protein	P01814	Immunoglobulin heavy variable 2-70 OS=Homo sapiens OX=9606 GN=IGHV2-70 PE=1 SV=2	0.007	4.048	6	1	2	1	1	119	13.3	6.52	5.11	1	2.497	1.651	1.461	1.33	1.389	1.953	62.1	154.9	102.4	90.7	82.5	86.2	121.2	1	1	1	1	1	1	1	High	High	High	High	High	High	High
FALSE	High	Master Protein	P53801	Pituitary tumor-transforming gene 1 protein-interacting protein OS=Homo sapiens OX=9606 GN=PTTG1IP PE=1 SV=1	0.007	4.046	4	1	2	1	1	180	20.3	8.79	4.56	1	0.974	1.03	0.855	0.76	0.667	0.521	120.5	117.4	124.2	103	91.7	80.4	62.8	1	1	1	1	1	1	1	High	High	High	High	High	High	High
FALSE	High	Master Protein	Q86UF1	Tetraspanin-33 OS=Homo sapiens OX=9606 GN=TSPAN33 PE=1 SV=1	0.007	4.028	5	1	1	1	1	283	31.5	7.17	4.29	1	0.729	0.714	0.922	0.75	0.738	0.01	144.2	105.1	103	133	108.2	106.4		1	1	1	1	1	1		High	High	High	High	High	High	Not Found
FALSE	High	Master Protein	A0A0B4J2B8	Immunoglobulin heavy variable 1/OR15-9 (non-functional) (Fragment) OS=Homo sapiens OX=9606 GN=IGHV1OR15-9 PE=4 SV=1	0.007	3.994	13	1	2	1	1	117	12.9	8.37	7.29	1	2.805	0.687	0.789	0.728	0.782	0.01	103.1	289.1	70.8	81.3	75.1	80.6		1	1	1	1	1	1		High	High	High	High	High	High	Not Found
FALSE	High	Master Protein	Q9UIQ6	Leucyl-cystinyl aminopeptidase OS=Homo sapiens OX=9606 GN=LNPEP PE=1 SV=3	0.007	3.979	4	2	3	2	1	1025	117.3	5.73	5.46	2	0.619	0.84	0.988	0.86	0.805	0.01	136.9	84.7	115.1	135.3	117.7	110.3		1	1	1	1	1	1		High	High	High	High	High	High	Not Found
FALSE	High	Master Protein	Q9NZH0	G-protein coupled receptor family C group 5 member B OS=Homo sapiens OX=9606 GN=GPRC5B PE=2 SV=2	0.007	3.953	3	1	1	1	1	403	44.8	8.24	3.86	1	0.934	0.951	0.666	0.652	0.528	0.435	147.9	138.2	140.7	98.5	96.5	78.2	64.3	1	1	1	1	1	1		High	High	High	High	High	High	Not Found
FALSE	High	Master Protein	A0A087WV75	Neural cell adhesion molecule 1 OS=Homo sapiens OX=9606 GN=NCAM1 PE=1 SV=1	0.007	3.952	3	2	2	2	1	884	97.3	4.93	4.84	2	1.025	1.52	1.167	1.67	1.355	2.382	69.2	70.9	105.2	80.8	115.5	93.7	164.8	2	2	2	2	2	2	1	High	High	High	High	High	High	High
FALSE	High	Master Protein	P35858	Insulin-like growth factor-binding protein complex acid labile subunit OS=Homo sapiens OX=9606 GN=IGFALS PE=1 SV=1	0.007	3.918	2	1	1	1	1	605	66	6.79	3.93	1	1.19	0.954	1.367	1.474	0.884	0.01	101.9	121.3	97.2	139.3	150.2	90.1		1	1	1	1	1	1		High	High	High	High	High	High	Not Found
FALSE	High	Master Protein	O14745	Na(+)/H(+) exchange regulatory cofactor NHE-RF1 OS=Homo sapiens OX=9606 GN=SLC9A3R1 PE=1 SV=4	0.007	3.908	6	2	2	2	1	358	38.8	5.77	4.69	2	1.072	1.135	1.015	1.099	0.973	0.01	111.2	119.3	126.2	112.9	122.2	108.2		2	2	2	2	2	2		High	High	High	High	High	High	Not Found
FALSE	High	Master Protein	Q15404	Ras suppressor protein 1 OS=Homo sapiens OX=9606 GN=RSU1 PE=1 SV=3	0.007	3.902	6	1	1	1	1	277	31.5	8.65	4.1	1	0.677	0.948	0.824	0.962	0.748	0.01	135.7	91.9	128.6	111.8	130.6	101.5		1	1	1	1	1	1		High	High	High	High	High	High	Not Found
FALSE	High	Master Protein	Q9H190	Syntenin-2 OS=Homo sapiens OX=9606 GN=SDCBP2 PE=1 SV=2	0.007	3.831	3	1	1	1	1	292	31.6	9.07	3.12	1	0.708	0.882	0.665	0.884	0.73	0.01	143.8	101.8	126.8	95.6	127	104.9		1	1	1	1	1	1		High	High	High	High	High	High	Not Found
FALSE	High	Master Protein	P06703	Protein S100-A6 OS=Homo sapiens OX=9606 GN=S100A6 PE=1 SV=1	0.007	3.784	16	2	2	2	1	90	10.2	5.48	4.97	2	1.113	1.011	0.952	1.076	1.084	0.01	112.2	124.9	113.5	106.9	120.8	121.6		2	2	2	2	2	2		High	High	High	High	High	High	Not Found
FALSE	High	Master Protein	M9MML0	Low affinity immunoglobulin gamma Fc region receptor III-A OS=Homo sapiens OX=9606 GN=FCGR3A PE=4 SV=2	0.007	3.778	3	1	1	1	1	359	40.2	7.4	3.58	1	1.154	0.867	1.245	1.083	1.02	0.01	109.9	126.8	95.3	136.9	119.1	112.1		1	1	1	1	1	1		High	High	High	High	High	High	Not Found
FALSE	High	Master Protein	Q969X1	Protein lifeguard 3 OS=Homo sapiens OX=9606 GN=TMBIM1 PE=1 SV=2	0.007	3.732	5	1	1	1	1	311	34.6	7.72	3.75	1	0.889	0.743	0.848	0.889	0.468	0.01	144.8	128.6	107.5	122.7	128.6	67.8		1	1	1	1	1	1		High	High	High	High	High	High	Not Found
FALSE	High	Master Protein	A0A0C4DH43	Immunoglobulin heavy variable 2-70D OS=Homo sapiens OX=9606 GN=IGHV2-70D PE=3 SV=1	0.007	3.719	12	2	3	2	1	119	13.3	8.29	7.5	2	1.793	3.535	2.628	2.829	1.612	1.07	48.4	86.7	171.1	127.2	136.9	78	51.8	2	2	2	2	2	1	1	High	High	High	High	High	High	High
FALSE	High	Master Protein	Q6ZN40	Tropomyosin 1 (Alpha), isoform CRA_f OS=Homo sapiens OX=9606 GN=TPM1 PE=1 SV=1	0.006	3.707	5	2	3	2	1	326	37.4	4.72	4.35	2	0.713	0.613	0.855	0.659	1.907	0.01	121.8	86.9	74.7	104.1	80.2	232.3		2	2	2	2	2	2		High	High	High	High	High	High	Not Found
FALSE	High	Master Protein	P53396	ATP-citrate synthase OS=Homo sapiens OX=9606 GN=ACLY PE=1 SV=3	0.006	3.661	1	1	1	1	1	1101	120.8	7.33	3.15	1	0.445	0.544	0.59	0.467	0.61	0.01	191.4	85.2	104.2	112.9	89.4	116.8		1	1	1	1	1	1		High	High	High	High	High	High	Not Found
FALSE	High	Master Protein	P04229	HLA class II histocompatibility antigen, DRB1-1 beta chain OS=Homo sapiens OX=9606 GN=HLA-DRB1 PE=1 SV=2	0.006	3.641	6	2	2	1	1	266	29.9	7.69	5.7	2	1.407	1.022	1.208	1.541	1.862	3.496	60.7	85.4	62	73.3	93.5	113	212.1	1	1	1	1	1	1	1	High	High	High	High	High	High	High
FALSE	High	Master Protein	P62328	Thymosin beta-4 OS=Homo sapiens OX=9606 GN=TMSB4X PE=1 SV=2	0.006	3.607	16	1	3	1	1	44	5.1	5.06	6.04	1	0.789	0.511	0.65	0.615	1.169	1.237	117.2	92.5	59.9	76.2	72.1	137	145	1	1	1	1	1	1	1	High	High	High	High	High	High	High
FALSE	High	Master Protein	P11049	Leukocyte antigen CD37 OS=Homo sapiens OX=9606 GN=CD37 PE=1 SV=2	0.006	3.607	6	1	1	1	1	281	31.7	7.94	4.55	1	0.853	0.843	0.757	0.651	0.482	0.01	152.7	130.2	128.7	115.6	99.3	73.6		1	1	1	1	1	1		High	High	High	High	High	High	Not Found
FALSE	High	Master Protein	O00391	Sulfhydryl oxidase 1 OS=Homo sapiens OX=9606 GN=QSOX1 PE=1 SV=3	0.006	3.6	2	1	1	1	1	747	82.5	8.92	3.4	1	0.941	0.924	0.906	0.915	0.82	0.01	127.1	119.7	117.5	115.1	116.3	104.2		1	1	1	1	1	1		High	High	High	High	High	High	Not Found
FALSE	High	Master Protein	Q9H221	ATP-binding cassette sub-family G member 8 OS=Homo sapiens OX=9606 GN=ABCG8 PE=1 SV=1	0.006	3.583	1	1	1	1	1	673	75.6	8.22	3.45	1	5.117	0.927	0.774	0.893	0.615	0.01	75.1	384.1	69.6	58.1	67	46.2		1	1	1	1	1	1		High	High	High	High	High	High	Not Found
FALSE	High	Master Protein	O00592	Podocalyxin OS=Homo sapiens OX=9606 GN=PODXL PE=1 SV=2	0.006	3.575	4	2	2	2	1	558	58.6	5.49	4.95	2	0.932	1.036	1.198	1.268	1.242	1.165	89.3	83.2	92.5	106.9	113.2	110.8	104	2	2	2	2	2	2	1	High	High	High	High	High	High	High
FALSE	High	Master Protein	P13598	Intercellular adhesion molecule 2 OS=Homo sapiens OX=9606 GN=ICAM2 PE=1 SV=2	0.006	3.538	5	1	1	1	1	275	30.6	7.43	4.2	1	0.469	0.475	0.482	0.443	0.504	0.01	207.5	97.3	98.5	100.1	92	104.6		1	1	1	1	1	1		High	High	High	High	High	High	Not Found
FALSE	Medium	Master Protein	P14923	Junction plakoglobin OS=Homo sapiens OX=9606 GN=JUP PE=1 SV=3	0.013	3.491	2	1	1	1	1	745	81.7	6.14	2.68	1	1.036	1.759	1.557	0.907	2.38	0.01	81	83.9	142.5	126.1	73.5	192.9		1	1	1	1	1	1		High	High	High	High	High	High	Not Found
FALSE	Medium	Master Protein	P61769	Beta-2-microglobulin OS=Homo sapiens OX=9606 GN=B2M PE=1 SV=1	0.013	3.489	8	1	2	1	1	119	13.7	6.52	6.98	1	0.962	0.636	0.755	0.739	0.878	1.425	109.4	105.3	69.6	82.7	80.9	96.1	155.9	1	1	1	1	1	1	1	High	High	High	High	High	High	High
FALSE	Medium	Master Protein	D3DX19	Claudin OS=Homo sapiens OX=9606 GN=CLDN5 PE=1 SV=1	0.013	3.455	3	1	1	1	1	303	31.6	9.07	4.05	1	0.791	1.619	0.894	0.859	0.95	1.137	96.6	76.4	156.3	86.4	82.9	91.7	109.8	1	1	1	1	1	1	1	High	High	High	High	High	High	High
FALSE	Medium	Master Protein	Q8NBI5	Solute carrier family 43 member 3 OS=Homo sapiens OX=9606 GN=SLC43A3 PE=1 SV=2	0.013	3.445	3	2	2	2	1	491	54.5	8.53	5.58	2	1.004	1.004	0.985	1.053	0.928	1.702	91.2	91.6	91.6	89.8	96	84.6	155.2	2	2	2	2	2	2	2	High	High	High	High	High	High	High
FALSE	Medium	Master Protein	J3KPF3	4F2 cell-surface antigen heavy chain OS=Homo sapiens OX=9606 GN=SLC3A2 PE=1 SV=1	0.013	3.417	2	1	1	1	1	631	68.1	5.05	3.26	1	1.092	0.981	1.193	1.208	1.343	0.01	102.7	112.1	100.8	122.5	124.1	137.9		1	1	1	1	1	1		High	High	High	High	High	High	Not Found
FALSE	Medium	Master Protein	P50552	Vasodilator-stimulated phosphoprotein OS=Homo sapiens OX=9606 GN=VASP PE=1 SV=3	0.013	3.406	3	1	1	1	1	380	39.8	8.94	3.47	1	0.758	0.442	0.585	0.51	1.06	0.01	160.7	121.8	71	94.1	82	170.3		1	1	1	1	1	1		High	High	High	High	High	High	Not Found
FALSE	Medium	Master Protein	P17858	ATP-dependent 6-phosphofructokinase, liver type OS=Homo sapiens OX=9606 GN=PFKL PE=1 SV=6	0.013	3.388	2	1	1	1	1	780	85	7.5	3.81	1	0.793	0.924	0.85	1.049	1.117	0.01	122.1	96.8	112.8	103.8	128.1	136.4		1	1	1	1	1	1		High	High	High	High	High	High	Not Found
FALSE	Medium	Master Protein	Q9UHR4	Brain-specific angiogenesis inhibitor 1-associated protein 2-like protein 1 OS=Homo sapiens OX=9606 GN=BAIAP2L1 PE=1 SV=2	0.013	3.382	6	2	2	2	1	511	56.8	8.68	5.16	2	2.063	1.008	0.749	0.84	0.726	0.01	109.6	226.1	110.5	82.1	92.1	79.6		2	2	2	2	2	2		High	High	High	High	High	High	Not Found
FALSE	Medium	Master Protein	O75264	Small integral membrane protein 24 OS=Homo sapiens OX=9606 GN=SMIM24 PE=2 SV=2	0.013	3.359	15	1	1	1	1	130	15	5.29	3.75	1	2.543	1.179	0.949	1.121	0.78	0.01	92.4	235.1	109	87.7	103.6	72.1		1	1	1	1	1	1		High	High	High	High	High	High	Not Found
FALSE	Medium	Master Protein	Q6UWP8	Suprabasin OS=Homo sapiens OX=9606 GN=SBSN PE=1 SV=2	0.013	3.356	15	2	2	2	1	590	60.5	7.01	4.68	2	0.93	1.201	1.001	1.193	1.663	0.01	100.2	93.2	120.3	100.3	119.5	166.6		2	2	2	2	2	2		High	High	High	High	High	High	Not Found
FALSE	Medium	Master Protein	A0A0C4DH30	Immunoglobulin heavy variable 3-16 (non-functional) (Fragment) OS=Homo sapiens OX=9606 GN=IGHV3-16 PE=1 SV=1	0.013	3.309	17	1	1	1	1	117	13.1	9.73	5.27	1	0.517	0.596	0.412	0.568	0.487	0.01	195.5	101.2	116.5	80.5	111.1	95.1		1	1	1	1	1	1		High	High	High	High	High	High	Not Found
FALSE	Medium	Master Protein	A0A0C4DH63	T cell receptor gamma joining P (Fragment) OS=Homo sapiens OX=9606 GN=TRGJP PE=4 SV=1	0.013	3.302	35	1	2	1	1	20	2.1	10.01	5.5	1	1.309	1.203	0.93	1.021	0.636	0.01	114.8	150.3	138.1	106.7	117.2	73		1	1	1	1	1	1		High	High	High	High	High	High	Not Found
FALSE	Medium	Master Protein	P28799	Granulins OS=Homo sapiens OX=9606 GN=GRN PE=1 SV=2	0.014	3.258	2	1	1	1	1	593	63.5	6.83	3.12	1	0.68	0.982	0.793	0.814	1.003	0.01	132.8	90.3	130.4	105.3	108.1	133.1		1	1	1	1	1	1		High	High	High	High	High	High	Not Found
FALSE	Medium	Master Protein	P17931	Galectin-3 OS=Homo sapiens OX=9606 GN=LGALS3 PE=1 SV=5	0.014	3.25	4	1	1	1	1	250	26.1	8.56	3.35	1	0.966	1.018	1.045	1.199	1.024	1.226	93.6	90.4	95.3	97.8	112.3	95.9	114.8	1	1	1	1	1	1	1	High	High	High	High	High	High	High
FALSE	Medium	Master Protein	O43423	Acidic leucine-rich nuclear phosphoprotein 32 family member C OS=Homo sapiens OX=9606 GN=ANP32C PE=2 SV=1	0.014	3.237	3	1	7	1	1	234	26.7	4.21	19.32	1	0.844	1.417	1.227	1.108	0.628	0.794	99.8	84.2	141.3	122.4	110.5	62.6	79.2	1	1	1	1	1	1	1	High	High	High	High	High	High	High
FALSE	Medium	Master Protein	O75531	Barrier-to-autointegration factor OS=Homo sapiens OX=9606 GN=BANF1 PE=1 SV=1	0.014	3.236	17	2	2	2	1	89	10.1	6.09	4.53	2	0.821	0.392	0.603	0.477	0.78	1.256	131.4	107.9	51.6	79.2	62.6	102.5	164.9	2	2	2	2	2	2	1	High	High	High	High	High	High	High
FALSE	Medium	Master Protein	P07900	Heat shock protein HSP 90-alpha OS=Homo sapiens OX=9606 GN=HSP90AA1 PE=1 SV=5	0.014	3.227	3	2	2	2	1	732	84.6	5.02	5.21	2	0.854	0.901	0.937	1.074	1.084	0.01	119.6	102.2	107.8	112.1	128.5	129.7		2	2	2	2	2	2		High	High	High	High	High	High	Not Found
FALSE	Medium	Master Protein	Q99808	Equilibrative nucleoside transporter 1 OS=Homo sapiens OX=9606 GN=SLC29A1 PE=1 SV=3	0.014	3.181	5	2	2	2	1	456	50.2	8.29	4.69	2	1.217	0.96	1.126	1.406	1.126	0.93	90.2	109.7	86.6	101.5	126.7	101.5	83.8	2	2	2	2	2	2	1	High	High	High	High	High	High	High
FALSE	Medium	Master Protein	P01911	HLA class II histocompatibility antigen, DRB1-15 beta chain OS=Homo sapiens OX=9606 GN=HLA-DRB1 PE=1 SV=2	0.014	3.172	6	2	2	1	1	266	29.9	7.74	5.23	2	0.828	0.778	1.071	1.064	0.938	0.01	123.3	102.1	95.9	132	131.2	115.6		1	1	1	1	1	1		High	High	High	High	High	High	Not Found
FALSE	Medium	Master Protein	Q15599	Na(+)/H(+) exchange regulatory cofactor NHE-RF2 OS=Homo sapiens OX=9606 GN=SLC9A3R2 PE=1 SV=2	0.014	3.168	6	2	2	2	1	337	37.4	7.93	2.34	2	0.82	0.795	0.812	0.892	0.927	0.01	133.4	109.4	106.1	108.3	119	123.7		2	2	2	2	2	2		High	High	High	High	High	High	Not Found
FALSE	Medium	Master Protein	P31151	Protein S100-A7 OS=Homo sapiens OX=9606 GN=S100A7 PE=1 SV=4	0.014	3.155	11	1	1	1	1	101	11.5	6.77	3.05	1	0.608	0.652	0.425	0.512	0.51	0.01	188.8	114.9	123	80.3	96.7	96.2		1	1	1	1	1	1		High	High	High	High	High	High	Not Found
FALSE	Medium	Master Protein	F5H2F4	C-1-tetrahydrofolate synthase, cytoplasmic OS=Homo sapiens OX=9606 GN=MTHFD1 PE=1 SV=1	0.014	3.112	2	1	1	1	1	1020	110.5	8.43	3.5	1	0.868	1.299	0.63	0.606	0.609	0.01	139.7	121.2	181.4	88	84.6	85.1		1	1	1	1	1	1		High	High	High	High	High	High	Not Found
FALSE	Medium	Master Protein	J3QRS3	Myosin regulatory light chain 12A OS=Homo sapiens OX=9606 GN=MYL12A PE=1 SV=1	0.014	3.105	6	1	1	1	1	177	20.4	4.75	2.83	1	0.779	0.696	0.915	0.75	0.948	0.01	137.6	107.2	95.7	125.9	103.2	130.5		1	1	1	1	1	1		High	High	High	High	High	High	Not Found
FALSE	Medium	Master Protein	P63218	Guanine nucleotide-binding protein G(I)/G(S)/G(O) subunit gamma-5 OS=Homo sapiens OX=9606 GN=GNG5 PE=1 SV=3	0.014	3.1	13	1	1	1	1	68	7.3	9.85	3.4	1	1.19	0.807	1.027	1.002	0.993	0.94	100.6	119.7	81.2	103.3	100.8	99.9	94.6	1	1	1	1	1	1	1	High	High	High	High	High	High	High
FALSE	Medium	Master Protein	P10412	Histone H1.4 OS=Homo sapiens OX=9606 GN=HIST1H1E PE=1 SV=2	0.014	3.09	4	2	2	2	1	219	21.9	11.03	4.87	2	1.343	1.299	1.017	0.942	1.308	1.861	79.8	107.2	103.7	81.2	75.2	104.4	148.5	2	2	2	2	2	2	1	High	High	High	High	High	High	High
FALSE	Medium	Master Protein	Q9UGM5	Fetuin-B OS=Homo sapiens OX=9606 GN=FETUB PE=1 SV=2	0.014	3.057	3	1	2	1	1	382	42	6.83	5.04	1	0.883	0.803	0.731	0.823	0.656	0.01	143	126.3	114.8	104.5	117.7	93.8		1	1	1	1	1	1		High	High	High	High	High	High	Not Found
FALSE	Medium	Master Protein	O75038	1-phosphatidylinositol 4,5-bisphosphate phosphodiesterase eta-2 OS=Homo sapiens OX=9606 GN=PLCH2 PE=2 SV=3	0.014	3.056	1	1	2	1	1	1416	154.6	7.84	5.3	1	0.715	0.54	0.522	0.568	0.617	0.01	176.7	126.3	95.4	92.2	100.4	109.1		1	1	1	1	1	1		High	High	High	High	High	High	Not Found
FALSE	Medium	Master Protein	P00915	Carbonic anhydrase 1 OS=Homo sapiens OX=9606 GN=CA1 PE=1 SV=2	0.014	3.051	4	1	1	1	1	261	28.9	7.12	3.82	1	1.734	1.055	0.825	1.14	1.21	0.963	88.3	153.1	93.1	72.8	100.7	106.9	85	1	1	1	1	1	1	1	High	High	High	High	High	High	High
FALSE	Medium	Master Protein	O60613	Selenoprotein F OS=Homo sapiens OX=9606 GN=SELENOF PE=1 SV=4	0.014	3.047	8	1	1	1	1	165	18.1	5.03	2.81	1	0.909	1.151	1.15	0.949	0.726	0.01	118.9	108.1	136.9	136.8	112.9	86.4		1	1	1	1	1	1		High	High	High	High	High	High	Not Found
FALSE	Medium	Master Protein	G5EA09	Syndecan binding protein (Syntenin), isoform CRA_a OS=Homo sapiens OX=9606 GN=SDCBP PE=1 SV=1	0.014	3.037	4	2	2	2	1	318	34.8	8.51	4.57	2	1.003	1.03	0.81	0.892	0.77	0.427	127.2	127.6	131	103	113.4	97.9	54.3	2	2	2	2	2	2		High	High	High	High	High	High	Not Found
FALSE	Medium	Master Protein	P07948	Tyrosine-protein kinase Lyn OS=Homo sapiens OX=9606 GN=LYN PE=1 SV=3	0.014	3.008	3	1	1	1	1	512	58.5	7.11	2.92	1	0.949	0.723	1.113	0.992	1	0.01	121.2	115	87.6	134.8	120.1	121.2		1	1	1	1	1	1		High	High	High	High	High	High	Not Found
FALSE	Medium	Master Protein	Q16610	Extracellular matrix protein 1 OS=Homo sapiens OX=9606 GN=ECM1 PE=1 SV=2	0.015	2.997	5	2	2	2	1	540	60.6	6.71	2.12	2	1.143	0.985	1.15	1.132	1.025	0.01	108.8	124.3	107.2	125.1	123.2	111.5		1	1	1	1	1	1		High	High	High	High	High	High	Not Found
FALSE	Medium	Master Protein	O75556	Mammaglobin-B OS=Homo sapiens OX=9606 GN=SCGB2A1 PE=1 SV=1	0.017	2.908	19	1	1	1	1	95	10.9	5.78	2.2	1	1.011	1.894	1.721	1.484	1.26	0.01	83.6	84.5	158.4	143.9	124.1	105.4		1	1	1	1	1	1		High	High	High	High	High	High	Not Found
FALSE	Medium	Master Protein	P32942	Intercellular adhesion molecule 3 OS=Homo sapiens OX=9606 GN=ICAM3 PE=1 SV=2	0.017	2.888	3	1	1	1	1	547	59.5	5.43	2.77	1	0.94	0.819	1.026	0.841	0.82	0.01	128.5	120.8	105.3	131.9	108.1	105.4		1	1	1	1	1	1		High	High	High	High	High	High	Not Found
FALSE	Medium	Master Protein	P59665	Neutrophil defensin 1 OS=Homo sapiens OX=9606 GN=DEFA1 PE=1 SV=1	0.017	2.884	10	1	1	1	1	94	10.2	6.99	2.62	1	1.888	1.451	1.064	0.856	0.924	0.01	97.5	184	141.4	103.7	83.4	90		1	1	1	1	1	1		High	High	High	High	High	High	Not Found
FALSE	Medium	Master Protein	A0A087X1C5	Putative cytochrome P450 2D7 OS=Homo sapiens OX=9606 GN=CYP2D7 PE=5 SV=1	0.017	2.857	3	1	1	1	1	515	57.5	8.4	2.77	1	0.409	0.537	0.468	0.499	0.54	1.224	149.7	61.2	80.3	70.1	74.7	80.8	183.2	1	1	1	1	1	1	1	High	High	High	High	High	High	High
FALSE	Medium	Master Protein	P48230	Transmembrane 4 L6 family member 4 OS=Homo sapiens OX=9606 GN=TM4SF4 PE=1 SV=1	0.017	2.842	7	1	1	1	1	202	21.4	5.12	2.04	1	3.903	2.449	1.276	1.248	1.688	0.01	60.5	236.3	148.2	77.2	75.6	102.2		1	1	1	1	1	1		High	High	High	High	High	High	Not Found
FALSE	Medium	Master Protein	K7ES93	TYRO protein tyrosine kinase-binding protein OS=Homo sapiens OX=9606 GN=TYROBP PE=1 SV=1	0.017	2.812	10	1	1	1	1	144	15.6	7.75	2.72	1	0.972	1.347	1.1	1.003	1.205	0.01	105.6	102.7	142.3	116.2	106	127.3		1	1	1	1	1	1		High	High	High	High	High	High	Not Found
FALSE	Medium	Master Protein	P51790	H(+)/Cl(-) exchange transporter 3 OS=Homo sapiens OX=9606 GN=CLCN3 PE=1 SV=2	0.017	2.777	2	1	1	1	1	818	90.9	6.28	3.35	1	0.771	1.286	0.83	1.011	0.752	0.01	123.9	95.5	159.3	102.9	125.2	93.2		1	1	1	1	1	1		High	High	High	High	High	High	Not Found
FALSE	Medium	Master Protein	F8VU56	Receptor-type tyrosine-protein phosphatase beta OS=Homo sapiens OX=9606 GN=PTPRB PE=1 SV=1	0.017	2.776	1	1	1	1	1	2127	239.4	7.74	2.62	1	1.3	0.977	1.032	1.612	1.165	0.01	98.8	128.4	96.5	102	159.2	115.1		1	1	1	1	1	1		High	High	High	High	High	High	Not Found
FALSE	Medium	Master Protein	P61158	Actin-related protein 3 OS=Homo sapiens OX=9606 GN=ACTR3 PE=1 SV=3	0.017	2.772	3	1	1	1	1	418	47.3	5.88	3	1	0.877	1.099	1.093	0.982	1.009	0.01	115.5	101.3	127	126.3	113.5	116.6		1	1	1	1	1	1		High	High	High	High	High	High	Not Found
FALSE	Medium	Master Protein	K7ES70	Microfibril-associated glycoprotein 4 OS=Homo sapiens OX=9606 GN=MFAP4 PE=1 SV=1	0.017	2.75	6	1	1	1	1	280	31.3	5.87	3.46	1	1.107	2.401	1.156	1.341	1.625	0.01	81.1	89.8	194.7	93.8	108.7	131.8		1	1	1	1	1	1		High	High	High	High	High	High	Not Found
FALSE	Medium	Master Protein	A0A0A0MRZ9	Immunoglobulin lambda variable 5-52 OS=Homo sapiens OX=9606 GN=IGLV5-52 PE=3 SV=1	0.019	2.733	7	1	3	1	1	124	13.4	7.91	7.61	1	1.646	4.557	3.16	3.885	2.496	3.697	34.2	56.4	156.1	108.2	133	85.5	126.6	1	1	1	1	1	1	1	High	High	High	High	High	High	High
FALSE	Medium	Master Protein	P98172	Ephrin-B1 OS=Homo sapiens OX=9606 GN=EFNB1 PE=1 SV=1	0.019	2.682	4	1	1	1	1	346	38	8.94	2.64	1	0.884	1.787	0.853	1.12	1.079	0.01	104.1	92	186.1	88.8	116.6	112.3		1	1	1	1	1	1		High	High	High	High	High	High	Not Found
FALSE	Medium	Master Protein	O75558	Syntaxin-11 OS=Homo sapiens OX=9606 GN=STX11 PE=1 SV=1	0.019	2.674	5	1	1	1	1	287	33.2	6.55	3.3	1	2.133	1.061	0.657	0.662	0.857	0.01	109.9	234.3	116.6	72.2	72.7	94.2		1	1	1	1	1	1		High	High	High	High	High	High	Not Found
FALSE	Medium	Master Protein	Q13724	Mannosyl-oligosaccharide glucosidase OS=Homo sapiens OX=9606 GN=MOGS PE=1 SV=5	0.019	2.664	2	1	1	1	1	837	91.9	8.9	2.7	1	0.836	0.981	0.882	0.944	0.835	2.554	87.1	72.9	85.5	76.9	82.3	72.8	222.6	1	1	1	1	1	1	1	High	High	High	High	High	High	High
FALSE	Medium	Master Protein	Q00796	Sorbitol dehydrogenase OS=Homo sapiens OX=9606 GN=SORD PE=1 SV=4	0.019	2.653	5	1	1	1	1	357	38.3	7.97	3.2	1	0.736	1.04	0.795	0.83	0.868	0.01	132.8	97.8	138.2	105.7	110.2	115.3		1	1	1	1	1	1		High	High	High	High	High	High	Not Found
FALSE	Medium	Master Protein	Q92954	Proteoglycan 4 OS=Homo sapiens OX=9606 GN=PRG4 PE=1 SV=3	0.019	2.65	1	1	2	1	1	1404	151	9.51	6.78	1	0.583	0.769	0.708	0.75	0.606	0.01	158.5	92.4	121.8	112.2	118.9	96.1		1	1	1	1	1	1		High	High	High	High	High	High	Not Found
FALSE	Medium	Master Protein	P03951	Coagulation factor XI OS=Homo sapiens OX=9606 GN=F11 PE=1 SV=1	0.019	2.635	2	1	1	1	1	625	70.1	8.1	3.01	1	1.175	1.128	1.191	1.169	0.979	2.244	78.8	92.6	88.9	93.8	92.1	77.1	176.8	1	1	1	1	1	1	1	High	High	High	High	High	High	High
FALSE	Medium	Master Protein	P61626	Lysozyme C OS=Homo sapiens OX=9606 GN=LYZ PE=1 SV=1	0.019	2.635	6	1	1	1	1	148	16.5	9.16	3.48	1	0.925	1.654	1.727	0.666	1.789	1.923	72.3	66.9	119.5	124.8	48.2	129.3	139	1	1	1	1	1	1	1	High	High	High	High	High	High	High
FALSE	Medium	Master Protein	O75882	Attractin OS=Homo sapiens OX=9606 GN=ATRN PE=1 SV=2	0.019	2.587	1	1	1	1	1	1429	158.4	7.31	2.36	1	0.814	0.857	0.958	1.154	0.864	0.01	124	100.9	106.2	118.8	143.1	107.1		1	1	1	1	1	1		High	High	High	High	High	High	Not Found
FALSE	Medium	Master Protein	P80108	Phosphatidylinositol-glycan-specific phospholipase D OS=Homo sapiens OX=9606 GN=GPLD1 PE=1 SV=3	0.019	2.568	1	1	1	1	1	840	92.3	6.37	2.92	1	0.882	0.904	0.871	1.023	1.045	0.01	122.3	107.9	110.5	106.5	125	127.8		1	1	1	1	1	1		High	High	High	High	High	High	Not Found
FALSE	Medium	Master Protein	P35613	Basigin OS=Homo sapiens OX=9606 GN=BSG PE=1 SV=2	0.019	2.567	4	1	1	1	1	385	42.2	5.66	3.18	1	1.224	0.941	0.931	1.094	1.188	0.01	109.8	134.4	103.3	102.1	120.1	130.4		1	1	1	1	1	1		High	High	High	High	High	High	Not Found
FALSE	Medium	Master Protein	Q9BUF7	Protein crumbs homolog 3 OS=Homo sapiens OX=9606 GN=CRB3 PE=1 SV=3	0.019	2.469	14	1	1	1	1	120	12.8	9.96	2.97	1	3.094	1.348	0.976	1.004	0.868	0.01	84.4	261.2	113.8	82.4	84.8	73.3		1	1	1	1	1	1		High	High	High	High	High	High	Not Found
FALSE	Medium	Master Protein	P53990	IST1 homolog OS=Homo sapiens OX=9606 GN=IST1 PE=1 SV=1	0.019	2.462	2	1	1	1	1	364	39.7	5.35	2.28	1	0.94	1.01	0.756	0.767	0.656	0.521	136.5	128.3	137.8	103.2	104.7	89.5	71.1	1	1	1	1	1	1		High	High	High	High	High	High	Not Found
FALSE	Medium	Master Protein	P13640	Metallothionein-1G OS=Homo sapiens OX=9606 GN=MT1G PE=1 SV=2	0.019	2.409	19	1	1	1	1	62	6.1	7.96	2.67	1	1.832	1.441	1.262	0.999	1.789	0.01	84.1	154.1	121.2	106.2	84	150.5		1	1	1	1	1	1		High	High	High	High	High	High	Not Found
FALSE	Medium	Master Protein	Q10589	Bone marrow stromal antigen 2 OS=Homo sapiens OX=9606 GN=BST2 PE=1 SV=1	0.019	2.385	6	1	1	1	1	180	19.8	5.6	2.49	1	2.017	1.271	0.889	1.183	1.288	1.255	78.6	158.6	100	69.9	93	101.2	98.7	1	1	1	1	1	1	1	High	High	High	High	High	High	High
FALSE	Medium	Master Protein	P31025	Lipocalin-1 OS=Homo sapiens OX=9606 GN=LCN1 PE=1 SV=1	0.019	2.373	6	1	1	1	1	176	19.2	5.58	2.39	1	1.256	1.675	2.621	1.094	1.043	0.01	80.6	101.2	134.9	211.2	88.1	84.1		1	1	1	1	1	1		High	High	High	High	High	High	Not Found
FALSE	Medium	Master Protein	Q9UHB6	LIM domain and actin-binding protein 1 OS=Homo sapiens OX=9606 GN=LIMA1 PE=1 SV=1	0.019	2.284	1	1	2	1	1	759	85.2	6.84	7.69	1	1.145	0.93	0.953	1.147	1.193	2.026	83.4	95.5	77.5	79.4	95.7	99.5	169	1	1	1	1	1	1	1	High	High	High	High	High	High	High
FALSE	Medium	Master Protein	E7EUC7	UTP--glucose-1-phosphate uridylyltransferase OS=Homo sapiens OX=9606 GN=UGP2 PE=1 SV=1	0.019	2.28	2	1	2	1	1	517	57.8	8.13	6.45	1	1.159	1.165	0.821	0.996	3.631	6.237	46.6	54.1	54.3	38.3	46.5	169.3	290.9	1	1	1	1	1	1	1	High	High	High	High	High	High	High
FALSE	Medium	Master Protein	Q99828	Calcium and integrin-binding protein 1 OS=Homo sapiens OX=9606 GN=CIB1 PE=1 SV=4	0.019	2.275	7	1	1	1	1	191	21.7	4.78	2.61	1	1.006	1.122	1.111	1.111	1.227	0.01	106.4	107	119.4	118.3	118.2	130.6		1	1	1	1	1	1		High	High	High	High	High	High	Not Found
FALSE	Medium	Master Protein	P05154	Plasma serine protease inhibitor OS=Homo sapiens OX=9606 GN=SERPINA5 PE=1 SV=3	0.019	2.262	2	1	1	1	1	406	45.6	9.26	2.27	1	0.796	1.095	1.084	1	1.097	0.01	115.3	91.8	126.2	125	115.3	126.5		1	1	1	1	1	1		High	High	High	High	High	High	Not Found
FALSE	Medium	Master Protein	A0A0G2JJG8	Megakaryocyte and platelet inhibitory receptor G6b OS=Homo sapiens OX=9606 GN=MPIG6B PE=1 SV=1	0.019	2.237	5	1	1	1	1	241	26	9.45	0	1	0.531	0.495	0.51	0.426	0.456	0.01	204.8	108.8	101.4	104.4	87.3	93.3		1	1	1	1	1	1		High	High	High	High	High	High	Not Found
FALSE	Medium	Master Protein	Q9Y5C1	Angiopoietin-related protein 3 OS=Homo sapiens OX=9606 GN=ANGPTL3 PE=1 SV=1	0.019	2.221	2	1	1	1	1	460	53.6	6.7	2.78	1	1.433	1.344	2.235	0.698	0.567	0.01	96.2	137.8	129.3	215	67.1	54.5		1	1	1	1	1	1		High	High	High	High	High	High	Not Found
FALSE	Medium	Master Protein	P62330	ADP-ribosylation factor 6 OS=Homo sapiens OX=9606 GN=ARF6 PE=1 SV=2	0.019	2.218	6	1	1	1	1	175	20.1	8.95	2.06	1	0.795	0.756	0.662	0.753	0.624	0.01	152.5	121.3	115.2	100.9	114.9	95.2		1	1	1	1	1	1		High	High	High	High	High	High	Not Found
FALSE	Medium	Master Protein	P55209	Nucleosome assembly protein 1-like 1 OS=Homo sapiens OX=9606 GN=NAP1L1 PE=1 SV=1	0.019	2.203	3	1	1	1	1	391	45.3	4.46	2.17	1	0.773	0.884	0.92	0.854	0.826	0.01	133.2	102.9	117.7	122.5	113.8	110		1	1	1	1	1	1		High	High	High	High	High	High	Not Found
FALSE	Medium	Master Protein	O00299	Chloride intracellular channel protein 1 OS=Homo sapiens OX=9606 GN=CLIC1 PE=1 SV=4	0.019	2.199	7	1	1	1	1	241	26.9	5.17	2.57	1	0.908	0.938	0.969	1.091	0.93	3.492	75	68.1	70.4	72.7	81.9	69.8	262.1	1	1	1	1	1	1	1	High	High	High	High	High	High	High
FALSE	Medium	Master Protein	P01034	Cystatin-C OS=Homo sapiens OX=9606 GN=CST3 PE=1 SV=1	0.019	2.108	11	1	1	1	1	146	15.8	8.75	2.43	1	0.496	0.75	0.717	0.838	0.76	0.01	153.5	76.2	115	110.1	128.6	116.6		1	1	1	1	1	1		High	High	High	High	High	High	Not Found
FALSE	Medium	Master Protein	A0A0A0MTS7	Titin OS=Homo sapiens OX=9606 GN=TTN PE=1 SV=1	0.019	2.105	0	1	1	1	1	35991	3992.2	6.39	3.6	1	1.651	0.555	0.952	1.71	2.701	5.159	51	84.2	28.3	48.6	87.2	137.7	263	1	1	1	1	1	1	1	High	High	High	High	High	High	High
FALSE	Medium	Master Protein	P05165	Propionyl-CoA carboxylase alpha chain, mitochondrial OS=Homo sapiens OX=9606 GN=PCCA PE=1 SV=4	0.019	2.077	1	1	1	1	1	728	80	7.52	2.71	1	1.634	0.732	0.695	0.553	0.676	0.01	132.3	216.2	96.9	91.9	73.1	89.4		1	1	1	1	1	1		High	High	High	High	High	High	Not Found
FALSE	Medium	Master Protein	P14625	Endoplasmin OS=Homo sapiens OX=9606 GN=HSP90B1 PE=1 SV=1	0.019	2.056	2	1	1	1	1	803	92.4	4.84	0	1	0.865	0.686	0.645	0.771	0.658	0.01	151.3	130.9	103.9	97.7	116.7	99.6		1	1	1	1	1	1		High	High	High	High	High	High	Not Found
FALSE	Medium	Master Protein	P16070	CD44 antigen OS=Homo sapiens OX=9606 GN=CD44 PE=1 SV=3	0.022	2.024	1	1	1	1	1	742	81.5	5.33	3.41	1	1.328	1.545	1.362	1.387	1.195	3.066	64.3	85.4	99.4	87.6	89.2	76.9	197.2	1	1	1	1	1	1	1	High	High	High	High	High	High	High
FALSE	Medium	Master Protein	Q6P2Q0	ABCB9 protein OS=Homo sapiens OX=9606 GN=ABCB9 PE=1 SV=1	0.022	2.003	1	1	1	1	1	769	84.7	7.93	3.15	1	1.329	0.708	0.813	0.384	0.558	0.01	146.1	194.2	103.4	118.8	56.1	81.5		1	1	1	1	1	1		High	High	High	High	High	High	Not Found
FALSE	Medium	Master Protein	Q9NZT1	Calmodulin-like protein 5 OS=Homo sapiens OX=9606 GN=CALML5 PE=1 SV=2	0.022	1.991	5	1	1	1	1	146	15.9	4.44	2.39	1	0.996	0.858	1.067	1.036	2.221	2.552	71.9	71.6	61.7	76.8	74.5	159.8	183.6	1	1	1	1	1	1	1	High	High	High	High	High	High	High
FALSE	Medium	Master Protein	P05107	Integrin beta-2 OS=Homo sapiens OX=9606 GN=ITGB2 PE=1 SV=2	0.023	1.971	1	1	1	1	1	769	84.7	6.95	2.29	1	1.767	0.874	1.346	1.33	0.918	0.01	96.8	171	84.6	130.2	128.7	88.8		1	1	1	1	1	1		High	High	High	High	High	High	Not Found
FALSE	Medium	Master Protein	A0A2R8YEH1	Ammonium transporter Rh type A OS=Homo sapiens OX=9606 GN=RHAG PE=1 SV=1	0.024	1.946	2	1	1	1	1	433	46.9	6.6	2.58	1	0.952	1.251	1.104	1.106	0.701	0.01	114.5	109	143.2	126.3	126.7	80.3		1	1	1	1	1	1		High	High	High	High	High	High	Not Found
FALSE	Medium	Master Protein	A0A075B6I4	Immunoglobulin lambda variable 10-54 OS=Homo sapiens OX=9606 GN=IGLV10-54 PE=3 SV=1	0.024	1.94	9	1	2	1	1	117	12.4	8.03	7.83	1	0.696	1.169	0.956	1.111	1.276	1.431	91.6	63.8	107.1	87.6	101.8	116.9	131.2	1	1	1	1	1	1	1	High	High	High	High	High	High	High
FALSE	Medium	Master Protein	Q9UHN6	Cell surface hyaluronidase OS=Homo sapiens OX=9606 GN=CEMIP2 PE=1 SV=1	0.024	1.852	1	1	1	1	1	1383	154.3	8.15	2.46	1	1.814	1.972	1.052	1.081	1.201	1.465	73	132.5	144	76.8	78.9	87.7	107	1	1	1	1	1	1	1	High	High	High	High	High	High	High
FALSE	Medium	Master Protein	A0A075B6I6	Immunoglobulin lambda variable 1-50 (non-functional) (Fragment) OS=Homo sapiens OX=9606 GN=IGLV1-50 PE=1 SV=1	0.024	1.836	25	1	1	1	1	118	12.3	6.49	2.66	1	0.927	0.87	0.757	1.286	1.351	0.01	113.1	104.8	98.4	85.6	145.4	152.8		1	1	1	1	1	1		High	High	High	High	High	High	Not Found
FALSE	Medium	Master Protein	O95183	Vesicle-associated membrane protein 5 OS=Homo sapiens OX=9606 GN=VAMP5 PE=1 SV=1	0.024	1.829	11	1	1	1	1	116	12.8	7.85	2.06	1	0.942	1.153	0.903	1.046	0.908	0.01	117.6	110.8	135.6	106.2	123	106.7		1	1	1	1	1	1		High	High	High	High	High	High	Not Found
FALSE	Medium	Master Protein	P05543	Thyroxine-binding globulin OS=Homo sapiens OX=9606 GN=SERPINA7 PE=1 SV=2	0.026	1.808	3	1	1	1	1	415	46.3	6.3	2.39	1	0.879	1.574	1.312	1.107	0.79	0.01	105.1	92.3	165.4	137.9	116.3	83		1	1	1	1	1	1		High	High	High	High	High	High	Not Found
FALSE	Medium	Master Protein	Q9UK41	Vacuolar protein sorting-associated protein 28 homolog OS=Homo sapiens OX=9606 GN=VPS28 PE=1 SV=1	0.026	1.807	5	1	1	1	1	221	25.4	5.54	2.64	1	1.048	1.382	1.039	1.143	1.039	0.01	105.3	110.3	145.4	109.3	120.3	109.3		1	1	1	1	1	1		High	High	High	High	High	High	Not Found
FALSE	Medium	Master Protein	A1L157	Tetraspanin-11 OS=Homo sapiens OX=9606 GN=TSPAN11 PE=2 SV=2	0.026	1.797	3	1	1	1	1	253	28.2	7.58	2.9	1	0.613	0.572	0.791	0.575	0.764	1.448	121.5	74.5	69.5	96.1	69.8	92.8	175.9	1	1	1	1	1	1	1	High	High	High	High	High	High	High
FALSE	Medium	Master Protein	Q9UQP3	Tenascin-N OS=Homo sapiens OX=9606 GN=TNN PE=1 SV=2	0.026	1.788	1	1	1	1	1	1299	143.9	5.63	2.82	1	0.795	1.634	1.155	0.99	0.847	0.01	109	86.6	178.1	126	108	92.3		1	1	1	1	1	1		High	High	High	High	High	High	Not Found
FALSE	Medium	Master Protein	O00186	Syntaxin-binding protein 3 OS=Homo sapiens OX=9606 GN=STXBP3 PE=1 SV=2	0.026	1.768	2	1	1	1	1	592	67.7	7.8	0	1	1.02	0.611	0.679	0.904	0.919	0.01	136.4	139.1	83.3	92.6	123.2	125.4		1	1	1	1	1	1		High	High	High	High	High	High	Not Found
FALSE	Medium	Master Protein	Q5T4S7	E3 ubiquitin-protein ligase UBR4 OS=Homo sapiens OX=9606 GN=UBR4 PE=1 SV=1	0.028	1.759	0	1	1	1	1	5183	573.5	6.04	2.07	1	0.943	1.028	0.962	0.815	0.796	0.01	126.3	119.1	129.8	121.4	102.9	100.5		1	1	1	1	1	1		High	High	High	High	High	High	Not Found
FALSE	Medium	Master Protein	Q15904	V-type proton ATPase subunit S1 OS=Homo sapiens OX=9606 GN=ATP6AP1 PE=1 SV=2	0.028	1.759	1	1	1	1	1	470	52	6.14	0	1	0.975	1.028	0.88	1.228	0.953	0.01	115.4	112.5	118.7	101.6	141.8	110		1	1	1	1	1	1		High	High	High	High	High	High	Not Found
FALSE	Medium	Master Protein	P20701	Integrin alpha-L OS=Homo sapiens OX=9606 GN=ITGAL PE=1 SV=3	0.027	1.724	1	1	1	1	1	1170	128.7	5.63	0	1	1.097	0.947	0.878	0.955	0.993	0.01	119.3	130.8	112.9	104.7	113.9	118.4		1	1	1	1	1	1		High	High	High	High	High	High	Not Found
FALSE	Medium	Master Protein	P55058	Phospholipid transfer protein OS=Homo sapiens OX=9606 GN=PLTP PE=1 SV=1	0.027	1.714	2	1	1	1	1	493	54.7	7.01	2.42	1	0.809	0.96	0.937	0.879	0.954	0.01	126.4	102.3	121.4	118.4	111.1	120.5		1	1	1	1	1	1		High	High	High	High	High	High	Not Found
FALSE	Medium	Master Protein	Q96RF0	Sorting nexin-18 OS=Homo sapiens OX=9606 GN=SNX18 PE=1 SV=2	0.027	1.714	1	1	1	1	1	628	68.9	5.68	2.23	1	3.863	1.286	1.156	0.985	0.786	0.01	77.1	297.9	99.2	89.1	76	60.7		1	1	1	1	1	1		High	High	High	High	High	High	Not Found
FALSE	Medium	Master Protein	Q5T749	Keratinocyte proline-rich protein OS=Homo sapiens OX=9606 GN=KPRP PE=1 SV=1	0.027	1.712	1	1	1	1	1	579	64.1	8.27	2.1	1	1.141	0.814	0.859	0.834	1.156	2.538	83.9	95.7	68.3	72.1	70	97	213	1	1	1	1	1	1	1	High	High	High	High	High	High	High
FALSE	Medium	Master Protein	J3KPS3	Fructose-bisphosphate aldolase OS=Homo sapiens OX=9606 GN=ALDOA PE=1 SV=1	0.034	1.669	4	1	1	1	1	368	39.8	8.09	1.71	1	1.117	0.641	0.951	0.886	1.082	0.01	123.3	137.7	79.1	117.3	109.3	133.4		1	1	1	1	1	1		High	High	High	High	High	High	Not Found
FALSE	Medium	Master Protein	P46976	Glycogenin-1 OS=Homo sapiens OX=9606 GN=GYG1 PE=1 SV=4	0.034	1.66	2	1	1	1	1	350	39.4	5.53	2.9	1	1.145	1.136	1.139	1.173	0.727	0.948	96.3	110.2	109.4	109.7	113	70	91.3	1	1	1	1	1	1	1	High	High	High	High	High	High	High
FALSE	Medium	Master Protein	P58166	Inhibin beta E chain OS=Homo sapiens OX=9606 GN=INHBE PE=1 SV=1	0.034	1.658	2	1	1	1	1	350	38.5	9.25	2.63	1	1.037	1.268	1.016	1.063	1.155	2.561	76.9	79.7	97.6	78.2	81.8	88.8	197	1	1	1	1	1	1	1	High	High	High	High	High	High	High
FALSE	Medium	Master Protein	P54709	Sodium/potassium-transporting ATPase subunit beta-3 OS=Homo sapiens OX=9606 GN=ATP1B3 PE=1 SV=1	0.034	1.652	5	1	1	1	1	279	31.5	8.35	2.92	1	0.829	0.669	0.672	1.006	0.841	0.01	139.5	115.6	93.4	93.8	140.3	117.4		1	1	1	1	1	1		High	High	High	High	High	High	Not Found
FALSE	Medium	Master Protein	Q7KZF4	Staphylococcal nuclease domain-containing protein 1 OS=Homo sapiens OX=9606 GN=SND1 PE=1 SV=1	0.034	1.643	2	1	1	1	1	910	101.9	7.17	0	1	1.117	1.659	1.32	1.289	1.224	0.01	92	102.7	152.6	121.5	118.6	112.6		1	1	1	1	1	1		High	High	High	High	High	High	Not Found
FALSE	Medium	Master Protein	U3KQK0	Histone H2B OS=Homo sapiens OX=9606 GN=HIST1H2BN PE=1 SV=1	0.034	1.64	4	1	1	1	1	166	18.8	10.54	2.63	1	1.125	1.265	0.628	0.513	0.529	0.841	118.7	133.4	150	74.5	60.8	62.8	99.7	1	1	1	1	1	1	1	High	High	High	High	High	High	High
FALSE	Medium	Master Protein	E9PGA6	C1QTNF3-AMACR readthrough (NMD candidate) OS=Homo sapiens OX=9606 GN=C1QTNF3-AMACR PE=4 SV=1	0.033	1.612	2	1	1	1	1	284	31.1	8.5	3.01	1	0.852	1.765	0.937	1.229	0.973	1.268	87.2	74.3	154	81.8	107.2	84.9	110.6	1	1	1	1	1	1	1	High	High	High	High	High	High	High
FALSE	Medium	Master Protein	O15162	Phospholipid scramblase 1 OS=Homo sapiens OX=9606 GN=PLSCR1 PE=1 SV=1	0.033	1.609	2	1	1	1	1	318	35	4.94	2.44	1	1.46	0.982	1.529	1.034	0.978	1.562	81.9	119.6	80.5	125.3	84.7	80.1	127.9	1	1	1	1	1	1	1	High	High	High	High	High	High	High
FALSE	Medium	Master Protein	Q92835	Phosphatidylinositol 3,4,5-trisphosphate 5-phosphatase 1 OS=Homo sapiens OX=9606 GN=INPP5D PE=1 SV=2	0.036	1.534	1	1	1	1	1	1189	133.2	7.59	2.43	1	1.685	0.47	0.244	0.18	0.063	0.01	192.2	323.8	90.4	46.9	34.6	12.2		1	1	1	1	1	1		High	High	High	High	High	High	Not Found
FALSE	Medium	Master Protein	Q96RT7	Gamma-tubulin complex component 6 OS=Homo sapiens OX=9606 GN=TUBGCP6 PE=1 SV=3	0.037	1.494	1	1	1	1	1	1819	200.4	6.32	3.14	1	0.787	1.131	0.456	0.394	0.695	0.01	156.9	123.5	177.4	71.5	61.8	109		1	1	1	1	1	1		High	High	High	High	High	High	Not Found
FALSE	Medium	Master Protein	A0A0G2JN42	Mucin-6 OS=Homo sapiens OX=9606 GN=MUC6 PE=1 SV=1	0.038	1.481	0	1	1	1	1	2439	256.9	7.39	2.1	1	1.045	1.264	1.093	1.099	1.357	1.805	80.8	84.4	102.1	88.3	88.8	109.7	145.8	1	1	1	1	1	1	1	High	High	High	High	High	High	High
FALSE	Medium	Master Protein	P01137	Transforming growth factor beta-1 proprotein OS=Homo sapiens OX=9606 GN=TGFB1 PE=1 SV=2	0.038	1.472	2	1	1	1	1	390	44.3	8.53	2.36	1	1.121	1.297	1.038	1.196	1.165	0.01	102.7	115.1	133.2	106.6	122.8	119.6		1	1	1	1	1	1		High	High	High	High	High	High	Not Found
FALSE	Medium	Master Protein	P22748	Carbonic anhydrase 4 OS=Homo sapiens OX=9606 GN=CA4 PE=1 SV=2	0.038	1.471	2	1	1	1	1	312	35	7.83	2.31	1	1.196	1.861	1.166	1.382	1.519	4.034	57.6	68.9	107.1	67.1	79.6	87.5	232.3	1	1	1	1	1	1	1	High	High	High	High	High	High	High
FALSE	Medium	Master Protein	Q9UKE5	TRAF2 and NCK-interacting protein kinase OS=Homo sapiens OX=9606 GN=TNIK PE=1 SV=1	0.038	1.449	1	1	1	1	1	1360	154.8	7.17	1.93	1	0.908	2.488	1.143	1.266	0.767	3.036	66	59.9	164.2	75.4	83.5	50.6	200.4	1	1	1	1	1	1	1	High	High	High	High	High	High	High
FALSE	Medium	Master Protein	A0A0U1RQQ9	SCY1-like protein 2 OS=Homo sapiens OX=9606 GN=SCYL2 PE=1 SV=1	0.038	1.441	1	1	2	1	1	933	104	8.22	5.92	1	0.871	0.846	0.931	0.965	0.984	1.714	95.7	83.4	81	89.1	92.4	94.2	164.1	1	1	1	1	1	1	1	High	High	High	High	High	High	High
FALSE	Medium	Master Protein	A0A075B6I7	Immunoglobulin lambda variable 5-48 (non-functional) OS=Homo sapiens OX=9606 GN=IGLV5-48 PE=1 SV=2	0.039	1.432	9	1	1	1	1	105	11.2	9.51	0	1	0.827	1.502	1.054	1.445	1.135	1.977	78.3	64.8	117.6	82.5	113.1	88.9	154.8	1	1	1	1	1	1	1	High	High	High	High	High	High	High
FALSE	Medium	Master Protein	P09525	Annexin A4 OS=Homo sapiens OX=9606 GN=ANXA4 PE=1 SV=4	0.039	1.431	3	1	1	1	1	319	35.9	6.13	2.48	1	1.275	1.152	0.938	0.894	1.236	4.365	64.5	82.2	74.3	60.5	57.6	79.7	281.3	1	1	1	1	1	1	1	High	High	High	High	High	High	High
FALSE	Medium	Master Protein	P40967	Melanocyte protein PMEL OS=Homo sapiens OX=9606 GN=PMEL PE=1 SV=2	0.04	1.431	1	1	1	1	1	661	70.2	5.58	2.84	1	0.834	0.747	0.397	0.426	0.35	0.01	186.5	155.6	139.3	74	79.5	65.2		1	1	1	1	1	1		High	High	High	High	High	High	Not Found
FALSE	Medium	Master Protein	P23280	Carbonic anhydrase 6 OS=Homo sapiens OX=9606 GN=CA6 PE=1 SV=3	0.04	1.429	2	1	1	1	1	308	35.3	7.02	2.09	1	0.629	0.71	0.714	0.784	0.601	0.01	157.7	99.2	112	112.6	123.7	94.7		1	1	1	1	1	1		High	High	High	High	High	High	Not Found
FALSE	Medium	Master Protein	Q969P0	Immunoglobulin superfamily member 8 OS=Homo sapiens OX=9606 GN=IGSF8 PE=1 SV=1	0.04	1.419	3	1	1	1	1	613	65	8	0	1	1.017	1.962	1.125	1.235	0.961	0.01	95.9	97.5	188.1	107.9	118.4	92.2		1	1	1	1	1	1		High	High	High	High	High	High	Not Found
FALSE	Medium	Master Protein	Q14242	P-selectin glycoprotein ligand 1 OS=Homo sapiens OX=9606 GN=SELPLG PE=1 SV=1	0.04	1.408	4	1	1	1	1	412	43.2	4.4	3.26	1	1.14	0.738	1.129	1.36	0.937	0.01	111.1	126.6	81.9	125.4	151	104		1	1	1	1	1	1		High	High	High	High	High	High	Not Found
FALSE	Medium	Master Protein	A0A0G2JH68	Protein diaphanous homolog 1 OS=Homo sapiens OX=9606 GN=DIAPH1 PE=1 SV=1	0.04	1.404	1	1	1	1	1	1272	141.3	5.39	0	1	0.909	0.963	1.222	0.955	0.991	0.01	115.9	105.4	111.6	141.6	110.7	114.9		1	1	1	1	1	1		High	High	High	High	High	High	Not Found
FALSE	Medium	Master Protein	Q8N4Q0	Prostaglandin reductase 3 OS=Homo sapiens OX=9606 GN=ZADH2 PE=1 SV=1	0.04	1.402	2	1	1	1	1	377	40.1	8.18	2.46	1	0.484	0.744	0.521	0.899	0.488	0.661	145.9	70.6	108.5	76.1	131.2	71.2	96.4	1	1	1	1	1	1	1	High	High	High	High	High	High	High
FALSE	Medium	Master Protein	Q9HCS7	Pre-mRNA-splicing factor SYF1 OS=Homo sapiens OX=9606 GN=XAB2 PE=1 SV=2	0.041	1.389	1	1	1	1	1	855	99.9	6.23	2.44	1	0.744	0.546	0.527	0.419	0.274	0.01	199.5	148.5	108.8	105.1	83.6	54.6		1	1	1	1	1	1		High	High	High	High	High	High	Not Found
FALSE	Medium	Master Protein	O15552	Free fatty acid receptor 2 OS=Homo sapiens OX=9606 GN=FFAR2 PE=1 SV=1	0.041	1.389	6	1	1	1	1	330	37.1	9.39	3.37	1	1.917	0.578	1.397	1.738	2.244	1.937	64.7	124.1	37.4	90.5	112.6	145.3	125.4	1	1	1	1	1	1	1	High	High	High	High	High	High	High
FALSE	Medium	Master Protein	H9KV90	SH3 and multiple ankyrin repeat domains protein 1 OS=Homo sapiens OX=9606 GN=SHANK1 PE=1 SV=1	0.041	1.383	0	1	2	1	1	2169	225.8	8.34	4.73	1	1.288	3.979	1.18	1.689	1.505	0.01	65.8	84.8	261.8	77.6	111.1	99		1	1	1	1	1	1		High	High	High	High	High	High	Not Found
FALSE	Medium	Master Protein	A0A140TA62	Uncharacterized protein OS=Homo sapiens OX=9606 GN=LOC100653049 PE=3 SV=2	0.044	1.371	3	1	1	1	1	436	49.4	5.06	2.99	1	0.988	1.046	1.98	0.869	1.723	0.635	71	70.1	74.3	140.6	61.7	122.4	45.1	1	1	1	1	1	1	1	High	High	High	High	High	High	High
